1 **The physiological response of the marine platyhelminth *Macrostomum lignano* to**  
2 **different environmental oxygen concentrations.**

3 Short title: Response of a flatworm to oxygen variation

4  
5 G. A. Rivera-Ingraham\*, U. Bickmeyer, D. Abele

6  
7 Alfred-Wegener-Institute for Polar and Marine Research.  
8 Dept. Functional Ecology  
9 Am Handelshafen 12, 27570 Bremerhaven, Germany.

10  
11 \*Corresponding author: [Georgina.Rivera-Ingraham@awi.de](mailto:Georgina.Rivera-Ingraham@awi.de) / [grivera@us.es](mailto:grivera@us.es)

12  
13  
14  
15 **ABSTRACT**

16 Respiration rate of meiofauna is difficult to measure, and the response to variations in  
17 the environmental oxygen concentrations has so far been mainly addressed through  
18 behavioral investigation. We investigated the effect of different oxygen concentrations  
19 on the physiology of the marine platyhelminth *Macrostomum lignano*. Respiration was  
20 measured using batches of 20 animals in a glass microtiter plate equipped with optical  
21 oxygen sensor spots. At higher oxygen saturations (>12kPa), animals showed a clear  
22 oxyconforming behavior. However, below this values, the flatworms kept respiration  
23 rates constant at  $0.064 \pm 0.001 \text{ nmol O}_2 \cdot \text{l}^{-1} \cdot \text{h}^{-1} \cdot \text{ind}^{-1}$  down to 3 kPa  $p\text{O}_2$ , and this rate was  
24 increased in 30% in animals that were reoxygenated after enduring a period of 1.5h in  
25 anoxia. Physiological changes related to tissue oxygenation were assessed using live  
26 imaging techniques with different fluorophores in animals maintained in normoxic (21  
27 kPa), hyperoxic (40 kPa), near anoxic ( $\approx 0$  kPa) conditions and subjected to anoxia-  
28 reoxygenation. Ageladine-A and BCECF both indicated that  $\text{pH}_i$  under near anoxia  
29 increases by about 0.07 to 0.10 units. Mitochondrial membrane potential,  $\Delta\psi_m$ , was  
30 higher in anoxic and hyperoxic compared to normoxic conditions (JC1). Staining with  
31 ROS sensitive dyes, DHE for detection of superoxide anion ( $\text{O}_2^{\bullet-}$ ) formation and C-  
32 H<sub>2</sub>DFFDA for other ROS species aside from  $\text{O}_2^{\bullet-}$  ( $\text{H}_2\text{O}_2$ ,  $\text{HOO}^{\bullet}$  and  $\text{ONOO}^{\bullet}$ ), both  
33 showed increased ROS formation following anoxia reoxygenation treatment. Animals  
34 exposed to hyperoxic, normoxic and anoxic treatments displayed no significant  
35 differences in  $\text{O}_2^{\bullet-}$  formation, whereas mitochondrial ROS formation as detected by C-  
36 H<sub>2</sub>DFFDA was higher after hyperoxic exposure and lowest under near anoxia compared  
37 to the normoxic control group. *M. lignano* seems to be a species tolerant to a wide range  
38 of oxygen concentrations (being able to maintain aerobic metabolism from extremely  
39 low  $p\text{O}_2$  and up to hyperoxic conditions) which is an essential prerequisite for  
40 successfully dealing with the drastic environmental oxygen variations that occur within  
41 intertidal sediments.

42  
43 **Keywords:** flatworm, live-imaging, meiofauna, respiration.

44  
45 Abbreviations used in the text:

46  $\Delta\psi_m$ =mitochondrial membrane potential

47 C-H<sub>2</sub>DFFDA= 5-(and-6)-carboxy-2',7'-difluorodihydrofluorescein diacetate

48 DHE=dihydroethidium

49 NH-FSW=Filtered sea water supplemented with 15mM Na-HEPES

- 50  $pH_i$ =intracellular pH
- 51  $P_{O_2}$ =oxygen partial pressure
- 52 ROS=reactive oxygen species
- 53 SDT=sodium diethyl-dithiocarbamate trihydrate
- 54 SOD=superoxide dismutase
- 55

56 INTRODUCTION

57

58 Marine meiofauna colonize the upper sediment layer of the ocean which, especially in  
59 coastal and intertidal sediments, can be highly variable with respect to oxygenation. On  
60 one hand, wave action and coastal currents often lead to mechanical mixing of oxygen  
61 rich surface water into the upper loosely packed sediment layers. Relatively compacted  
62 sediment surfaces in shallow waters are often densely colonized by benthic microalgae  
63 that cause daily peaks of photosynthetic oxygenation in the upper 1-2 cm of sediment  
64 surface. On the other hand, coastal sediments contain high amounts of organic matter  
65 from decaying macroalgae or terrestrial and riverine coastal runoff. The chemical and  
66 microbial oxygen demand in these sediments is high so that oxygen that diffuses  
67 downwards is rapidly consumed. This produces steep sedimentary redox gradients  
68 between the upper, sometimes even hyperoxic and the lower suboxic to anoxic layers,  
69 which often span no more than 10 to 50 cm below which the sediment becomes  
70 chronically anoxic and sulfidic (rich in hydrogen sulfide, H<sub>2</sub>S) (Fenchel and Finlay,  
71 2008). These sediments are colonized by highly diverse macro- and meiofauna  
72 communities, the composition of which varies depending on sediment stability, grain  
73 size composition, organic matter content and oxygenation. Whereas macrofauna  
74 organisms often build sedimentary burrows that they oxygenate through irrigation with  
75 oxygen rich surface waters, meiofauna organisms move between the sand grains,  
76 seeking optimal positioning between too high and too low environmental oxygenation  
77 according to their metabolic and nutritional requirements. In very few cases, marine  
78 meiofauna were shown to actively establish suitable environmental oxygen levels in  
79 their closest environment between the sediment grains (Corbari et al., 2005). Much  
80 more often it was shown that the meiofauna stratify in response to the sedimentary  
81 oxygen gradient (Corbari et al., 2004) and different groups of meiofauna have been  
82 described as oxophilic, microoxophilic and thiobiotic according to their preferred  
83 positioning in the small scale chemical and redox gradients within the sediment column  
84 and around macrofauna burrows (Fenchel and Finlay, 1995; Morrill et al., 1988). This  
85 behavior precludes not only that meiofauna species have different metabolic strategies  
86 to cope with low and variable environmental oxygenation, but also that they would have  
87 means to sense oxygen (and hydrogen sulfide) and react flexibly to changing  
88 environmental oxygenation. These reactions include vertical migrations within the  
89 sediment column, often away from too high surface oxygenation (Corbari et al., 2005),  
90 and/or adjustment of metabolic rate to cope with reduced oxygen availability. However,  
91 soft bodied meiofauna worms, such as nematodes and platyhelminths, generally deal  
92 with fluctuating tissue oxygenation and changes in environmental redox state because of  
93 their small size and fast equilibration time. Whereas several studies have assessed the  
94 behavioral (Rosenberg et al., 1991; Tinson and Laybourn-Parry, 1985) and ecological  
95 responses to fluctuating oxygenation (Wetzel et al., 2001), studies of the physiological  
96 response to fluctuating chemical and oxygenation gradients are scarce.  
97 A seminal paper by Morrill et al. (1988) reported antioxidant activities to be better  
98 established in thiobiotic than in oxybiotic meiofauna, giving rise to the idea that i)  
99 normoxic oxygen levels could already be “hyper-oxic” for these low oxygen adapted  
100 species, ii) that the oxidation of toxic H<sub>2</sub>S could give rise to the formation of reactive  
101 oxygen species (ROS) in thiobiotic, low oxygen adapted meiofauna.  
102 In the present study, we investigated the physiological effects of hyperoxic and anoxic  
103 exposure conditions in the interstitial marine flatworm *Macrostomum lignano*  
104 (Rhabditophora, Macrostomorpha) Ladurner et al, 2005. *M. lignano* has been  
105 established as a new model in sexual selection (Schärer et al., 2005) and evolutionary

106 and developmental studies (Egger et al., 2006; Morris et al., 2006), but especially in  
107 stem-cell research (Bode et al., 2006; Pfister et al., 2007) and the role of these stem-  
108 cells for the process of ageing (Mouton et al., 2009).

109 Platyhelminths are transparent and, thus, elegant model organisms to study cellular and  
110 subcellular processes *in vivo*. Using “live imaging” techniques we provide a first set of  
111 data regarding the physiological responses of individual flatworms to extreme states of  
112 environmental oxygenation and, further, on the effect of anoxia and subsequent  
113 reoxygenation on ROS forming processes, mitochondrial membrane potential and tissue  
114 pH. We developed a technique to record oxygen partial pressure ( $pO_2$ ) dependent  
115 oxygen consumption rates using batches of 20 flatworms in order to describe their  
116 metabolic response to variable environmental oxygenation.

117 In this study we used non-invasive optical techniques to understand how an anoxia  
118 tolerant, animal responds to high, low and fluctuating oxygenation, especially with  
119 respect to ROS formation, mitochondrial functioning and maintenance pH homeostasis  
120 during anoxia-reoxygenation, a detrimental situation in many human pathologies.

121

## 122 MATERIALS AND METHODS

### 123 *Animal culturing*

124 Cultures of *M. lignano* (DV-1 line) were reared at the Alfred Wegener Institute  
125 (Bremerhaven, Germany) in Petri dishes with Guillard’s F/2 medium at room  
126 temperature (RT) (20°C) and fed weekly the diatom *Nitzschia* sp. For experimentation,  
127 however, a sterile medium composed of seawater filtered over a 0.2µm Whatman filter  
128 and supplemented with 15mM Na-HEPES (NH-FSW) was used. Buffering was  
129 necessary to avoid pH changes in the medium when setting anoxic or hyperoxic  
130 conditions.

131

### 132 *Respiration measurements*

133 Two different treatments were considered for the respiration measurements: normoxic  
134 (21kPa) and anoxic (0kPa) followed by reoxygenation. For the latter, animals were kept  
135 for 1.5h under anoxic conditions (kept in a gas tight glovebox which was equilibrated  
136 with 100% N<sub>2</sub> and immersed in an anoxic medium which was prepared by flushing with  
137 100% N<sub>2</sub>) and later reoxygenated by bubbling with air for an additional 1.5h. Prior to  
138 conducting respiration measurements, experimental animals were isolated from the  
139 cultures and maintained without food for ca. 20h in NH-FSW. After the acclimation  
140 time, 3 groups of 20 animals were transferred with a micropipette to 3 individual wells  
141 of a glass microtiter plate (Mikroglas Chemtech GmbH, Mainz, Germany) previously  
142 equipped with oxygen sensor spots (SP-PSt3-NAU-D5-YOP, Precision Sensing GmbH,  
143 Regensburg, Germany) glued onto the bottom of each well. An additional well was  
144 maintained as control, and contained only NH-FSW and the sensor spot. Each of the  
145 wells was filled completely with NH-FSW to its maximum capacity which was  $100 \pm$   
146  $0.5 \mu\text{l}$ , to avoid the formation of air bubbles when sealing the wells. Each of the four  
147 wells was sealed with a coverslip and the complete surface of the microtiter plate was  
148 additionally covered with a layer of auto-adhesive Armaflex<sup>®</sup> (Armacell Enterprise  
149 GmbH, Münster, Germany). Additional pressure was maintained on the complete  
150 surface of the plate in order to ensure air-tight sealing. Measurements were carried out  
151 with a 4-channel fiber-optical oxygen meter (Oxy-4) and non-invasive oxygen sensors  
152 (Precision Sensing GmbH, Regensburg, Germany) which were daily calibrated  
153 following the manufacturer’s description. Data were recorded at 15sec intervals and the  
154 experiments were stopped when the oxygen was completely consumed from each of the  
155 animal chambers, which usually took around 16h. All experiments were conducted at

156 RT. Data corresponding to the first 30min following the start of the experiment were  
157 discarded in order to avoid interference from stress related to the manipulation of the  
158 worms. Respiration rates were expressed as  $\text{nmol O}_2 \cdot \text{L}^{-1} \cdot \text{h}^{-1} \cdot \text{ind}^{-1}$ . The critical oxygen  
159 pressure ( $p_c$ ) (Tang, 1933) was calculated using the equation of Duggleby (1984).

160

### 161 *Optical measurements*

162 In this study intracellular pH, mitochondrial membrane potential, mitochondrial density  
163 and reactive oxygen species (ROS) concentrations were measured by “live imaging”  
164 techniques, which consist in applying specific dyes and *in-vivo* visualization using a  
165 Leica TCS SP5II confocal microscope (Leica Microsystems CMS GmbH, Wetzlar,  
166 Germany) and a CCD camera system (Visitron Systems GmbH, Puchheim, Germany).

167

168 Four treatments were considered in our study: control (21kPa), anoxia (0kPa),  
169 hyperoxia (40kPa) and anoxia followed by reoxygenation. Experiments were carried out  
170 in a gas tight glovebox which was equilibrated with either 100% N<sub>2</sub> (anoxia) or 40%  
171 O<sub>2</sub>/60% N<sub>2</sub> (hyperoxia) using a Wösthoff gas mixing pump (Wösthoff GmbH, Bochum,  
172 Germany). Anoxic medium was prepared by flushing with 100% N<sub>2</sub>, while hyperoxic  
173 NH-FSW medium was obtained by flushing with a 40% O<sub>2</sub>-60% N<sub>2</sub> mixture. Thirty  
174 minutes flushing were enough for equilibration in all cases as confirmed by  
175 measurements of the oxygen content using optical oxygen sensors and the Presens  
176 Oximeter (see above).

177 Treatments were conducted with batches of 10 animals which were manipulated at the  
178 same time in 2ml Utermöhl chambers for 1.5h. The microscopic chamber in which the  
179 animals were anoxically incubated was sealed while still inside of the glovebox and  
180 under the gas stream. The chamber was then transferred to the confocal microscope and  
181 for the anoxic treatment, it should be noted that we cannot exclude some minor  
182 reoxygenation. Thus we decided to use the term of “near anoxia” for the treatment that  
183 was aimed to be strict anoxia. After finishing the incubation, a fluorophore was added to  
184 the animals in normoxic, anoxic (severely hypoxic) and hyperoxic treatments.

185 For the anoxia-reoxygenation treatment we can assure that the worms were incubated in  
186 absolute anoxia, whereupon the chamber was opened and medium and animals were  
187 allowed to reoxygenate for an additional 1.5 h. After this time, the dye was added to the  
188 reoxygenation treatment. All dyes were used individually for separate batches of  
189 animals in order to avoid any possible interference among dyes. The list of the different  
190 dyes used in the present study along with their mechanisms of function is given in table  
191 1, while incubation and analysis conditions for each of these dyes are detailed in table 2.

192

193 For both of the pH-sensitive dyes used in the present study (ageladine-A and BCECF),  
194 further calibration was needed in order to assign numerical pH values to the  
195 experimentally recorded intensities/ratios. For ageladine-A (Fujita et al., 2003) this was  
196 done following the method described by Bickmeyer et al. (2008) and Bickmeyer (2012)  
197 in which the average values obtained for each of the treatments are expressed as a  
198 proportion of the control values, and by assuming that non-specialized cells under these  
199 control conditions would present a putative  $\text{pH}_i$  of 7.3-7.4. On the other hand, and since  
200 BCECF fluorescence intensity at 490 nm linearly increases between 6.4 and 7.8 pH  
201 (Silver, 2003), BCECF results were also converted to  $\text{pH}_i$  by constructing a calibration  
202 curve using the Nigericin technique (Nigericin sodium salt, N7143-5mg, Sigma Aldrich,  
203 Germany) described by Thomas et al. (1979).

204 Fluorimetric analysis of the response of the animals to the treatment conditions were  
205 carried out in sealed microscope slides using a Leica TCS SP5II confocal microscope.

206 For validation of the  $pH_i$  results, further analyses were carried out using a wide-field  
207 fluorescence microscope Zeiss Axiovert-10 (Zeiss GmbH, Germany) (equipped a CCD  
208 camera system, Visitron, Puchheim, Germany) and applying BCECF staining. For  
209 analysis, animals were anesthetized in a 2:1 mixture of 7.14%  $MgCl_2 \cdot 6H_2O$  and NH-  
210 FSW (Pfannkuche and Thiel, 1988). One picture per individual and per PMT, when  
211 ratio calculation was required, was taken for each of the animals using a 10x objective  
212 lens. In order to avoid photobleaching, a short period (<5 sec) of low resolution (256 x  
213 256 pixel) live scanning was applied for focus adjustments and afterwards only one  
214 single scan (512 x 512 pixel) was run of each individual. Autofluorescence was  
215 suppressed by adjusting the threshold, and phototoxicity was minimized by the  
216 multiphoton laser for low wavelengths scans.

217

218 Image analysis was carried out using Leica LAS Lite software (Leica Microsystems  
219 CMS GmbH 2011). Quantification was carried out by plotting 5 transects per animal  
220 (always perpendicular to the longitudinal axis of the animal and in all cases selecting the  
221 areas of highest intensity, Fig. 1). The maximum value for each transect was obtained  
222 and the values of the 5 transects were averaged for each individual.

223

224 Experiments were repeated for a minimum of two times (if results were identical) and  
225 up to 12 times, in order to confirm the differences between treatments. Data from the  
226 different replicas were pooled. However, since dye uptake by the animals varied among  
227 days, the confocal settings needed to be adjusted in order to optimize the quality of the  
228 images taken. Thus, data normalization was required prior pooling. Data were  
229 normalized by expressing all values within one experimental replica (40 worms) as  
230 percentage of the maximum recorded value in that experiment. The maximum value  
231 was set to equal 100%. Statistical analyses were performed using SPSS 15.0 (SPSS Inc.,  
232 Chicago, IL, USA). Resulting data were compared using ANOVA (followed by  
233 Student-Newman-Keuls *a-posteriori* multiple comparison test) when data complied  
234 with the assumptions for parametric analyses. When this was not the case, Kruskal-  
235 Wallis tests were conducted.

236

## 237 RESULTS

### 238 *Respiration measurements*

239 For the normoxic treatment,  $P_{O_2}$  dependent respiration rates were analyzed in a total of  
240 10 pools, each consisting in 20 animals. Figure 2 shows that respiration rates decreased  
241 rapidly (by 70%) between 19 to 12.5kPa in the chamber. Below this  $po_2$ , *M. lignano*  
242 starts to regulate respiration down to a low critical  $po_2$ . Thus, for *M. lignano*, a first  
243 critical oxygen partial pressure ( $p_c$ ) was established at 13 kPa ( $p_{c1}$ ), which marks the  
244 point at which the organisms are switching between conformity to regulation. Between  
245 12.5 and approximately 3kPa the respiration rates of the worms were constant around  
246  $0.064 \pm 0.001 \text{ nmol O}_2 \cdot \text{l}^{-1} \cdot \text{h}^{-1} \cdot \text{ind}^{-1}$ . A second  $p_c$  appears at  $1.36 \pm 0.32 \text{ kPa}$  ( $p_{c2}$ ), where  
247 respiration rates started to decrease again with declining  $po_2$ . Thus, the analysis revealed  
248 a high and a low  $pc$  above which ( $p_{c1}$ ) and below which ( $p_{c2}$ ) the worms switch from  
249 regulating to conforming,  $po_2$  dependent respiration. The same pattern was observed for  
250 the animals that were previously maintained under anoxic conditions and later  
251 reoxygenated. However, the interval at which animals maintained constant respiration  
252 rates, values were significantly higher ( $0.083 \pm 0.001 \text{ nmol O}_2 \cdot \text{l}^{-1} \cdot \text{h}^{-1} \cdot \text{ind}^{-1}$ ) ( $F=458.23$ ;  
253  $p<0.001$ ).

254

### 255 *Activity observations*

256 Normoxic and hyperoxic animals moved rapidly in the Petri dishes with behavioural  
257 characteristic best described as unidirectional burst swimming. For microscopic analysis  
258 at these high oxygenation levels, the worms had to be anesthetized with  $MgCl_2$ .  
259 Contrary, movement were drastically reduced in anoxia and often the worms started to  
260 swim in circles. Many worms were completely immobilized and displayed only  
261 epithelial cilia movements. Movements were completely reactivated by reoxygenation,  
262 with animals often reaching normoxic levels of activity after 1.5 h under reoxygenated  
263 conditions.

264

#### 265 *pH measurements*

266 Staining with the pH sensitive dye ageladine-A (Fig. 3a and supplementary material fig.  
267 1a) indicated that the tissue pH levels in anoxic worms or the ones exposed to anoxia-  
268 reoxygenation were significantly more alkaline compared to normoxic and hyperoxic  
269 animals; ANOVA ( $F=10.38$ ;  $p<0.001$ ). Further estimation of the pH values (using the  
270 values of normoxic animals as a reference and assuming that non-specialized cells have  
271 a pH of 7.4) indicated a pH-increase by approximately 0.10 units under near anoxia and  
272 anoxia-reoxygenation.

273

274 Staining with BCECF (supplementary material fig. 1b) corroborated the general pattern  
275 obtained with ageladine in which anoxic and reoxygenated individuals were  
276 significantly more basic than the normoxic and hyperoxic treatment groups ( $F=3.70$ ;  
277  $p<0.05$ ) (Fig. 3b). As these results contradicted all our assumptions that animals  
278 exposed to near anoxia should become, if anything, more acidic, we applied yet another  
279 approach with the wide-field fluorescence imaging microscope and BCECF. Again,  
280 animals under near anoxia and anoxia-reoxygenation had the most alkaline values  
281 (supplementary material fig. 2) (showing an average increase of 0.07 units) whereas the  
282 normoxic and hyperoxic treated worms had a tissue pH of 7.46.

283

#### 284 *Mitochondrial density and membrane potential specific staining*

285 MitoTracker staining indicated most mitochondria to be located in the animals' body  
286 wall in epithelial and muscle cells, as well as around the mouth area (Fig. 4).  
287 MitoTracker Green FM (supplementary material fig. 3a) stained different treatment  
288 groups with different intensities ( $K=54.09$ ;  $p<0.000$ ). Animals kept under hyperoxic  
289 conditions (40 kPa) were stained with highest intensity, theoretically suggesting  
290 maximum mitochondrial density in hyperoxic worms, followed by individuals under  
291 normoxic conditions which displayed less intensive staining (Fig. 5a). Animals kept in  
292 anoxia had the lowest staining values with MitoTracker green, and individuals that were  
293 subsequently reoxygenated returned to staining intensity recorded in normoxia.

294 To determine whether the significant differences between differently oxygenated groups  
295 were associated with oxygenation dependent capacities for dye uptake, a second  
296 experiment was performed in which the animals were stained prior to the exposure to  
297 the different oxygenation treatments. With this approach we obtained exactly the same  
298 group specific pattern as in the first experiment in which the dye was applied following  
299 incubation at different oxygen levels. Therefore we used MitoTracker Deep Red 633 in  
300 a third approach (supplementary material fig. 3b), which did not produce a clear group-  
301 specific pattern. Pooled data from the 4 replicas conducted with MitoTracker Deep Red  
302 633, yielded no significant differences among treatments ( $K=6.98$ ;  $p=0.072$ ) (Fig. 5b).  
303 High resolution confocal imagery confirmed staining of individual mitochondria in *M.*  
304 *lignano* cells (Fig. 6).

305

306 Staining with the dye JC-1 (supplementary material fig. 3c) indicated significant  
307 differences in the chemiosmotic  $H^+$  potential ( $\Delta\psi_m$ ) across the mitochondrial inner  
308 membrane among treatments ( $F=15.14$ ;  $p<0.001$ ) (Fig. 5c). The smallest potentials were  
309 measured in animals exposed to normoxia and in the ones that were reoxygenated after  
310 1.5 h of anoxic incubation. Animals exposed in hyperoxic and anoxic media showed  
311 significantly more red/green staining, indicating an elevated membrane potential, i.e. a  
312 stronger  $H^+$  gradient.

313

#### 314 *Staining for ROS detection*

315 Superoxide anion ( $O_2^{\bullet-}$ ) concentrations were assessed with dihydroethidium (DHE)  
316 (supplementary material fig. 4a). DHE staining was similar in animals exposed to  
317 anoxic, normoxic and hyperoxic conditions. Animals that were reoxygenated after a  
318 period of 1.5h in anoxia had significantly increased DHE staining compared to all other  
319 groups ( $K=15.77$ ;  $p<0.001$ ) (Fig. 7a). Formation of other ROS species aside from  $O_2^{\bullet-}$   
320 ( $H_2O_2$ ,  $HOO\bullet$  and  $ONOO^{\bullet}$ ) in *M. lignano* cells were assessed using C-H<sub>2</sub>DFFDA  
321 (supplementary material fig. 4b), which again showed important differences between  
322 treatments ( $K=80.82$ ;  $p<0.000$ ). The staining intensity decreased in the order anoxia-  
323 reoxygenation = hyperoxia > normoxia > near anoxia (Fig. 7b) indicating ROS  
324 formation to decrease between hyperoxia and anoxia as expected.

325

#### 326 *Effects of superoxide dismutase (SOD) and sodium diethyl-dithiocarbamate trihydrate* 327 *(SDT) on ROS staining*

328 To scrutinize for the causes of the high DHE signal in anoxically incubated worms that  
329 should theoretically not be able to form  $O_2^{\bullet-}$ , we applied a SOD solution (Sigma S-2515)  
330 and the SOD inhibitor SDT (Sigma D-3506) to anoxic animals stained with DHE (Fig.  
331 8a). The first results with neither SOD nor SDT addition again lead to significant DHE  
332 staining (above the background signal) in anoxically incubated specimens, although the  
333 values were significantly lower than those obtained with normoxic animals. SOD  
334 addition to anoxically incubated animals significantly reduced DHE staining, as  $O_2^{\bullet-}$   
335 radicals were converted to  $H_2O_2$  at higher rates. Contrary, addition of the SOD-inhibitor  
336 SDT caused 2-fold higher DHE fluorescence in anoxic compared to normoxically  
337 exposed animals, because less  $O_2^{\bullet-}$  radicals were converted to  $H_2O_2$ . Around 90% of the  
338 animals died under anoxic exposure with addition of SDT. After performing these tests  
339 that indirectly confirm the specificity of DHE for  $O_2^{\bullet-}$  detection, we assessed the effect  
340 of SOD addition on DHE and C-H<sub>2</sub>DFFDA staining in an experiment with both dyes  
341 (Fig. 8b). Addition of SOD to the medium of anoxically incubated worms once again  
342 significantly reduced  $O_2^{\bullet-}$  staining in the DHE-stained worms compared to the normoxic  
343 control group. Contrary, SOD addition significantly increased C-H<sub>2</sub>DFFDA staining,  
344 suggesting higher  $H_2O_2$  concentrations in anoxically incubated SOD supplemented  
345 animals than in normoxic controls.

346

## 347 DISCUSSION

348

#### 349 *M. lignano as marine model organism for live imaging of physiological stress*

350 In the present study we used living *M. lignano* individuals for the application of live  
351 imaging techniques. The transparency of this organism allowed an adequate and  
352 satisfactory measurement of the physiological parameters taken into account. Moreover,  
353 its small size also favoured a fast and complete dye uptake making live imaging with  
354 the whole animal possible.

355



356 *Po<sub>2</sub> dependent respiration in M. lignano*

357 Respiration measurements in *M. lignano* cannot be conducted with single animals, and  
358 instead require batches of 20 specimens maintained in small volumes (90-100  $\mu$ l) of  
359 liquid. As the respiration rates are extremely low, measurements need to be conducted  
360 in small glass or plexiglass chambers without linings made of Teflon, known to be an  
361 oxygen binder.

362 Exposing *M. lignano* to decreasing oxygen concentrations during the respiration  
363 measurements indicated that the worms maintain constant consumption rates between 3  
364 and 12.5kPa. This could be indicating that this is the species' optimum range of  
365 respiration and the animals are actually regulating oxygen consumption, most likely by  
366 adjusting ciliary beat frequency. Velocity of ciliary pumping movements may determine  
367 the water flow over the body surface which, in this species, also represents the  
368 respiratory epithelium. We could not quantify ciliary beat frequency in the present study  
369 but, however, we did not observe remarkable differences in cilia movements under  
370 different oxygen concentrations. Without being able to rule out the hypothesis that  
371 animals are actively regulating ventilation through cilia beating, it should also be  
372 considered the possibility that such regulation does not exist and that, in fact, results  
373 are driven by mitochondria saturation above 3kPa and that the activity of an alternative  
374 oxidase could be responsible for the increase in O<sub>2</sub> consumption above 12.5kPa.  
375 Regardless the reason, the range of constant respiration characterizes *M. lignano* as  
376 aerobic hypoxia tolerant species. Similar *po<sub>2</sub>* dependent respiration patterns have been  
377 reported for other marine meiofauna such as oligochaetes (Giere et al., 1999) and the  
378 authors suggested this to be an important prerequisite for successfully inhabiting  
379 intertidal sediments with microscale spatial variations of the oxygen concentration.  
380 Animals that were reoxygenated after enduring a 1.5h period under anoxia, showed a  
381 30% increase in their respiration rates, probably due to the stress of the procedure.

382

383 *Responses to high oxygen concentrations*

384  $\Delta\psi_m$ , and the way the mitochondrial membrane potential is affected by different oxygen  
385 concentrations, has mainly been addressed in mammalian cell cultures. For *M. lignano*  
386 the JC1 measurements under normoxia and hyperoxia suggest the increase in oxygen  
387 consumption not to be due to mitochondrial uncoupling (opening of the mitochondrial  
388 membrane transmission pore, MTP), but to a more intensive respiration, respectively  
389 electron flow, which causes increased mitochondrial membrane potential ( $\Delta\psi_m$ ) in  
390 hyperoxically exposed worms. Contrary mitochondrial uncoupling and reduction of  
391  $\Delta\psi_m$  under hyperoxic conditions has been observed in mammalian microvascular cells  
392 (Sastre et al., 2000) and pneumocytes (Guthmann et al., 2005) which impressively  
393 highlights the difference between oxyconforming flatworms and oxyregulating  
394 mammalian cells. We did not observe aggregation of worms under normoxic/hyperoxic  
395 conditions indicating collective re-breathing as observed in ostracods when facing too  
396 high oxygen levels (Corbari et al., 2005). Indeed, *M. lignano* would warrant more  
397 thorough investigations of its migration or aggregation behaviour within oxygenation  
398 structured micro-environments (Fenchel and Finlay, 2008). However, we did observe  
399 that the locomotory activity of the worms was conspicuously higher in normoxic and  
400 hyperoxically manipulated treatments, with no observable difference between both  
401 oxygenation states. Thus, as in many other infaunal species (Abele et al 1998),  
402 normoxic oxygen levels are already high for these plathyhelminths and their behaviour  
403 indicates an attempt to reduce oxygenation in their sedimentary environment. This  
404 increased activity is fuelled by the enhanced respiration above 12.5kPa.

405

406 The C-H<sub>2</sub>DFFDA measurements further indicate an increase in ROS (H<sub>2</sub>O<sub>2</sub>, HOO• and  
407 ONOO<sup>-</sup>) production compared to normoxic worms, whereas no effect of hyperoxia on  
408 O<sub>2</sub><sup>•-</sup> concentrations was observed in the DHE measurements. A cross-experiment in  
409 which we added either SOD or SOD inhibitor STD to the medium confirmed that the  
410 DHE signal depends primarily on the amount of O<sub>2</sub><sup>•-</sup> in the cells. The measurements  
411 with ROS sensitive fluorophores therefore indicate that under hyperoxia the worms  
412 SOD activity converts excess O<sub>2</sub><sup>•-</sup> to H<sub>2</sub>O<sub>2</sub>. This conversion is abolished by the SOD  
413 inhibitor STD which killed the animals when they were exposed under hyperoxic  
414 conditions and STD. Mitochondrial production of ROS increases linearly with  
415 increasing oxygen concentration (Turrens et al., 1982), and hyperoxia has been shown to  
416 elicit oxidative stress and antioxidant responses in marine model organisms (Abele et  
417 al., 1998; Lushchak and Bagnyukova, 2006). Interestingly, 12.5kPa is also the limit at  
418 which mitochondria of the mammalian lung start to release H<sub>2</sub>O<sub>2</sub> at a faster rate  
419 compared to lower oxygen levels, indicating antioxidant defenses starting to be  
420 overwhelmed. It seems a bit far-fetched to suggest a common upper *pc* for such distinct  
421 systems as meiofauna species and human lung epithelia, but the comparison illustrates  
422 the wide applicability of the hypothesis that in very diverse systems *po*<sub>2</sub> is kept at very  
423 low levels to prevent hyperoxic ROS production.

424  
425 pH of the tissue in hyperoxia was shown to be slightly more acidic than in animals kept  
426 under normoxic conditions. This can result from various mechanisms such as  
427 intensified hydrolysis of ATP and oxidative inhibition of the Na/H<sup>+</sup> antiporter under  
428 enhanced oxidative stress, as reported for brain cells (Mulkey et al., 2004) and for  
429 crustaceans (Abele-Oeschger et al., 1997). Furthermore, in fish and some crustaceans  
430 hyperoxic shocks can result in a reduction of ventilation rates, which cause extracellular  
431 acidosis (Gilmour and Perry, 1994; Gilmour, 2001; Wheatly and Toop, 1989).

#### 432 433 *Responses to anoxia and subsequent reoxygenation*

434 Under anoxic conditions *M. lignano* showed drastically reduced movements,  
435 presumably an energy saving behaviour in response to the lack of oxygen. A similar  
436 response to anoxia has been reported for a wide variety of invertebrate species, like  
437 bivalves (e.g. de Zwaan and Wijsman, 1976) or crustaceans (e.g. Hervant et al., 1995).

438  
439 Even though we did not obtain numerical  $\Delta\psi_m$  results, our data indicate that *M. lignano*  
440 mitochondria mount a stronger H<sup>+</sup> gradient under low oxygen concentrations than at  
441 normoxic conditions (Fig. 5). Compared at normoxia, hypoxia tolerant invertebrates  
442 have lower  $\Delta\psi_m$  values than cold-blooded vertebrate and mammalian mitochondria  
443 (Abele et al., 2007; Brookes et al., 1998; Keller et al., 2004). Anoxic *M. lignano* also  
444 maintained high  $\Delta\psi_m$  values as hyperoxic individuals, reinforcing the view that the  
445 species not only tolerates low oxygen concentration but keeps up the mitochondrial  
446 proton gradient down to very low *po*<sub>2</sub>. Under severely hypoxic to anoxic conditions <  
447 1.5 kPa oxygen consumption rates started to decline as oxygen became limiting.  
448 Maintenance of the high proton gradient would then be due to reduced energy  
449 expenditures including complete absence of swimming mobility so that energetic  
450 requirements can be estimated to be minimal. This leads to the conservation of a high  
451 H<sup>+</sup> gradient because of a reduced phosphorylation activity and proton backflow at the  
452 ATPase.

453  
454 On the other hand, anoxic animals also featured the most alkaline (least acidic)  
455 intracellular pH. This is paradoxical in the sense that for many organisms, cells and

456 tissues, severe hypoxia has been demonstrated to lead to a decrease in cellular ATP,  
457 increase of the free intracellular calcium concentrations (e.g. Kristián and Siesjö, 1996)  
458 and acidification of extra- and intracellular pH (e.g. Bickler, 1992). Only few studies  
459 have observed hypoxic alkalization in cancer cells (see review by Webb et al., 2011)  
460 and certain mammalian cells and are in keeping with our results (Mitsufuji et al., 1995).  
461 Such an alkalization of the intracellular pH during anoxia could well be an adaptive  
462 strategy to avoid apoptosis, known to be associated with intracellular acidification  
463 (Lagadic-Gossman et al., 2004; Matsuyama et al., 2000). But the question remains how  
464 such an increase of  $\text{pH}_i$  can be achieved. In cancer cells this has been associated with  
465 changes in the expression and/or activity of membrane transporters and ion pumps (see  
466 Webb et al., 2011). Other authors like Mitsufuji et al. (1995) suggested that the  
467 increasing pH values might be attributed to the activation of the  $\text{Na}/\text{H}^+$ -antiporter during  
468 hypoxia. Since the  $\text{Na}^+$  gradient across the cellular membrane is maintained by the  
469  $\text{Na},\text{K}$ -dependent ATP-ase, the driving force for the proton export by the  $\text{Na}/\text{H}^+$ -  
470 antiporter is an energy (ATP) dependent process. The  $\text{Na}/\text{H}^+$ -antiporter exports  
471 intracellular protons, thus increasing  $\text{pH}_i$  and preventing acidosis until the cellular stores  
472 of ATP are exhausted. We have, however, demonstrated that mitochondrial membrane  
473 potential and potentially also the electron flow are maintained down to very low oxygen  
474 concentrations. Since ATP requirements are reduced through the reduction of  
475 locomotion, we assume ATP to be available for the upkeep of the  $\text{Na}^+$  gradient and so to  
476 stabilize secondary active proton export during severe hypoxia, which would explain  
477 less acidic values in our near anoxia exposed worms. Since ATP concentration was not  
478 measured in the present study, this hypothesis cannot be corroborated. In future studies  
479 ATP concentrations and involvement of membrane transporters in stabilizing  
480 intracellular pH can be tested by luminescence assays (ATP+APD) and using specific  
481 inhibitors for membrane transporters. Another factor that could theoretically contribute  
482 to the more alkaline pH values during periods of low oxygen concentrations would be  
483 the decrease in ATP hydrolysis, which also involves  $\text{H}^+$  release, due to the reduction of  
484 the worms' muscular activity. Although we consider hypoxic alkalisation to be an  
485 important new finding based on live imaging techniques and confirmed by usage of two  
486 different pH-sensitive dyes, further investigations of this phenomenon are  
487 recommended. While no exact calibration in vivo has been yet developed for the use of  
488 Ageladine-A, BCECF has a reported accuracy of 0.07 pH units (Franck et al., 1996),  
489 which is within the range shift that we have detected in the present study. Further  
490 experiments are planned to see whether  $\text{pH}_i$  alkalisation during hypoxia in the worms  
491 is accompanied by an extracellular acidification as observed in cancer cells (Webb et  
492 al., 2011).

493  
494 The tenet that mitochondrial ROS formation increases linearly with oxygen  
495 concentration in cells (Turrens et al., 1982) is also disputable for the worms. Whereas  
496 the  $\text{H}_2\text{O}_2$  formation was in agreement with this theory,  $\text{O}_2\bullet^-$  formation follows a  
497 different pattern: *M. lignano* individuals under near anoxia showed similar  $\text{O}_2\bullet^-$   
498 concentrations as normoxic and hyperoxic animals. Under conditions of strict anoxia  
499 and thus in the absence of oxygen, ROS can definitely not be produced. In consequence,  
500 under so-called anoxia, minimal traces of oxygen must still have been present, enough  
501 to cause some  $\text{O}_2\bullet^-$  formation in the worms. It is still under debate if ROS can be  
502 produced under hypoxia (Hermes-Lima et al., 1998; Hermes-Lima and Zenteno-Savin,  
503 2002) and some evidence of this happening first came from direct ROS measurements  
504 (Vanden Hoek et al., 1997), followed by detection through resulting DNA damage  
505 (Englander et al., 1999). These results can, however, also be explained by the low  $K_m$

506 for O<sub>2</sub> of mitochondrial nitric oxide synthase, which would lead to production of NO,  
507 estimated to be around 5-10% of the normal steady rate of NO production (Alvarez et  
508 al., 2003). This NO may bind to and inhibit cytochrome oxidase, causing an increase of  
509 its K<sub>m</sub> for oxygen and, consequently, increased reduction of the upstream electrons  
510 transporters such as complex I and III and in consequence, enhance formation of O<sub>2</sub>•<sup>-</sup>  
511 under hypoxic conditions (reviewed by Turrens, 2003). Further, NO can react with  
512 superoxide to form toxic peroxynitrite which can lead to all sorts of macromolecular  
513 damage, including DNA damage, and presumably also induce antioxidant systems.  
514 Based on the results obtained through the use of SOD and STD and their effect on  
515 anoxic individuals, we suggest that SOD might be inhibited during anoxia, which would  
516 additionally contribute to the high O<sub>2</sub>•<sup>-</sup> and the low H<sub>2</sub>O<sub>2</sub> concentrations recorded under  
517 these conditions. For other invertebrate species such as clams, a decrease in SOD  
518 expression and activity has also been observed (Monari et al., 2005).

#### 519 *Effect of oxygenation on MitoTracker fluorescence*

520 Mitochondria in *M. lignano* are mainly concentrated in muscular and epithelial cells,  
521 providing energy to the numerous cilia and for body contraction. Although both  
522 MitoTracker dyes stained the same location, MitoTracker Green FM and MitoTracker  
523 Deep Red 633 gave significantly different results (Fig. 5 and supplementary material  
524 fig. 3) with respect to the comparison across treatments. Only with MitoTracker Green  
525 we observed a decrease in staining under anoxia, which suggests fluorescence of this  
526 dye to be negatively affected by anoxic exposure, even though it has been reported to be  
527 independent of membrane potential (Métivier et al., 1998). Some studies have  
528 demonstrated that this may not be true (Keij et al., 2000), and similar oxygenation  
529 dependent patterns of JC-1 and MitoTracker Green FM in *M. lignano* strongly suggest  
530 that MitoTracker Green is indeed sensitive to Δψ<sub>m</sub>. In that case, MitoTracker Green FM  
531 cannot be considered as a useful probe for mitochondrial density in experiments  
532 involving variable tissue oxygenation. This is further supported by the fact that  
533 MitoTracker Deep Red 633 staining was independent of the experimental oxygenation  
534 state and can thus be considered a better tool for determining mitochondrial mass  
535 (Haugland, 2002) in this kind of experiment.

#### 536 537 538 539 CONCLUSIONS

540 In an attempt to establish the platyhelminth *M. lignano* as an applicable whole animal  
541 model for physiological investigations, we determined its peculiar physiological  
542 response to anoxic and hyperoxic exposure at different levels of cellular functioning.  
543 The worms are hypoxia tolerant and maintain the mitochondrial proton gradient and  
544 presumably also ATP levels during at least two hours of anoxic exposure.  
545 Oxyconforming respiration below 3 kPa apparently satisfies the worm's maintenance  
546 metabolism and prevents onset of cellular acidosis, while mobility ceases altogether and  
547 only ciliary movements are observable in anoxia and severe hypoxia. Elevated DHE  
548 fluorescence indicated superoxide formation in near anoxia which might be attributable  
549 to diminishment of SOD activity at low tissue oxygenation. However, we suggest that  
550 *M. lignano* could also be an interesting model to study hypothetical respiratory chain  
551 superoxide formation at low tissue oxygenation under the possible influence of hypoxic  
552 NO formation. The response to hyperoxia also differed from mammalian systems, but  
553 aligned with other marine invertebrate infauna that increase respiration rates in a pO<sub>2</sub>  
554 dependent manner above an upper critical p<sub>c2</sub>. This is often interpreted as an attempt to  
555 reduce excess oxygen in the animals' environment and could be characteristic of

556 species that have successfully adapted to deal with the vagaries of environmental  
557 oxygenation in intertidal sediments.

558

559

#### 560 ACKNOWLEDGEMENTS

561 The authors would like to thank Nelly Tremblay for her advice and comments on the  
562 respiration measurements and further data analysis, Stefanie Meyer for her valuable  
563 laboratory assistance and Peter Karuso, Achim Grube and Matthias Köck for kindly  
564 supplying the Ageladine-A used in the present study. Thanks also go to Dr. V.  
565 Lushchak and one anonymous referee for the comments on the original manuscript.

566

#### 567 FUNDING

568 This study was supported by Fundación Ramón Areces through a post-doctoral grant  
569 awarded to G.A.

570

571

#### 572 REFERENCES

573

574 **Abele-Oeschger, D., Sartoris, F. J. and Pörtner, H.-O.** (1997). Hydrogen  
575 Peroxide Causes a Decrease in Aerobic Metabolic Rate and in Intracellular pH in the  
576 Shrimp *Crangon crangon*. *Comparative Biochemistry and Physiology Part C:*  
577 *Pharmacology, Toxicology and Endocrinology* **117**, 123-129.

578 **Abele, D., Großpietsch, H. and Pörtner, H. O.** (1998). Temporal fluctuations  
579 and spatial gradients of environmental Po<sub>2</sub>, temperature, H<sub>2</sub>O<sub>2</sub> and H<sub>2</sub>S in its intertidal  
580 habitat trigger enzymatic antioxidant protection in the capitellid worm *Heteromastus*  
581 *filiformis*. *Marine Ecology Progress Series* **163**, 179-191.

582 **Abele, D., Philipp, E., Gonzalez, P. and Puntarulo, S.** (2007). Marine  
583 invertebrate mitochondria and oxidative stress. *Frontiers in Biochemistry* **12**, 933-946.

584 **Alvarez, S., Valdez, L. B., Zaobornyj, T. and Boveris, A.** (2003). Oxygen  
585 dependence of mitochondrial nitric oxide synthase activity. *Biochemical and*  
586 *Biophysical Research Communications* **305**, 771-775.

587 **Bickler, P. E.** (1992). Cerebral anoxia tolerance in turtles: regulation of  
588 intracellular calcium and pH. *American Journal of Physiology - Regulatory, Integrative*  
589 *and Comparative Physiology* **263**, R1298-R1302.

590 **Bickmeyer, U.** (2012). The Alkaloid Ageladine A, Originally Isolated from  
591 Marine Sponges, Used for pH-Sensitive Imaging of Transparent Marine Animals.  
592 *Marine Drugs* **10**, 223-233.

593 **Bickmeyer, U., Grube, A., Klings, K.-W. and Köck, M.** (2008). Ageladine A,  
594 a pyrrole-imidazole alkaloid from marine sponges, is a pH sensitive membrane  
595 permeable dye. *Biochemical and Biophysical Research Communications* **373**, 419-422.

596 **Bode, A., Salvenmoser, W., Nimeth, K., Mahlke, M., Adamski, Z.,**  
597 **Rieger, R., Peter, R. and Ladurner, P.** (2006). Immunogold-labeled S-phase  
598 neoblasts, total neoblast number, their distribution, and evidence for arrested neoblasts  
599 in *Macrostomum lignano* (Platyhelminthes, Rhabditophora). *Cell and Tissue Research*  
600 **325**, 577-587.

601 **Brookes, P. S., Buckingham, J. A., Tenreiro, A. M., Hulbert, A. J. and**  
602 **Brand, M. D.** (1998). The Proton Permeability of the Inner Membrane of Liver  
603 Mitochondria from Ectothermic and Endothermic Vertebrates and from Obese Rats:  
604 Correlations with Standard Metabolic Rate and Phospholipid Fatty Acid Composition.

605 *Comparative Biochemistry and Physiology Part B: Biochemistry and Molecular*  
606 *Biology* **119**, 325-334.

607 **Corbari, L., Carbonel, P. and Massabuau, J.-C.** (2005). The early life history  
608 of tissue oxygenation in crustaceans: the strategy of the myodocopid ostracod  
609 *Cylindroleberis mariae*. *Journal of Experimental Biology* **208**, 661-670.

610 **Corbari, L., Carbonel, P. and Massabuau, J. C.** (2004). How a low tissue O<sub>2</sub>  
611 strategy could be conserved in early crustaceans? the example of the podocopid  
612 ostracods. *Journal of Experimental Biology* **207**, 4415-4425.

613 **de Zwaan, A. and Wijsman, T. C. M.** (1976). Anaerobic metabolism in  
614 bivalvia (Mollusca) Characteristics of anaerobic metabolism. *Comparative*  
615 *Biochemistry and Physiology Part B: Comparative Biochemistry* **54**, 313-323.

616 **Duggleby, R. G.** (1984). Regression analysis of nonlinear Arrhenius plots: An  
617 empirical model and a computer program. *Computers in Biology and Medicine* **14**, 447-  
618 455.

619 **Egger, B., Ladurner, P., Nimeth, K., Gschwentner, R. and Rieger, R.** (2006).  
620 The regeneration capacity of the flatworm &i&t;Macrostomum lignano —on  
621 repeated regeneration, rejuvenation, and the minimal size needed for regeneration.  
622 *Development Genes and Evolution* **216**, 565-577.

623 **Englander, E. W., Greeley, G. H., Wang, G., Perez-Polo, J. R. and Lee, H.-**  
624 **M.** (1999). Hypoxia-induced mitochondrial and nuclear DNA damage in the rat brain.  
625 *Journal of Neuroscience Research* **58**, 262-269.

626 **Fenchel, T. and Finlay, B.** (1995). Ecology and evolution in anoxic worlds.  
627 Oxford: Oxford University Press.

628 **Fenchel, T. and Finlay, B.** (2008). Oxygen and the Spatial Structure of  
629 Microbial Communities. *Biological Reviews* **83**, 553-569.

630 **Franck, P., Petitpain, N., Cherlet, M., Dardennes, M., Maachi, F., Schutz,**  
631 **B., Poisson, L. and Nabet, P.** (1996). Measurement of intracellular pH in cultured cells  
632 by flow cytometry with BCECF-AM. *Journal of Biotechnology* **46**, 187-195.

633 **Fujita, M., Nakao, Y., Matsunaga, S., Seiki, M., Itoh, Y., Yamashita, J., van**  
634 **Soest, R. W. M. and Fusetani, N.** (2003). Ageladine A: An Antiangiogenic  
635 Matrixmetalloproteinase Inhibitor from the Marine Sponge *Agelas nakamurai*1. *Journal*  
636 *of the American Chemical Society* **125**, 15700-15701.

637 **Giere, O., Preusse, J. H. and Dubilier, N.** (1999). *Tubificoides benedii*  
638 (Tubificidae, Oligochaeta) – a pioneer in hypoxic and sulfidic environments. An  
639 overview of adaptive pathways. *Hydrobiologia* **406**, 235-241.

640 **Gilmour, K. and Perry, S.** (1994). The effects of hypoxia, hyperoxia or  
641 hypercapnia on the acid-base disequilibrium in the arterial blood of rainbow trout.  
642 *Journal of Experimental Biology* **192**, 269-84.

643 **Gilmour, K. M.** (2001). The CO<sub>2</sub>/pH ventilatory drive in fish. *Comparative*  
644 *Biochemistry and Physiology - Part A: Molecular & Integrative Physiology* **130**, 219-  
645 240.

646 **Guthmann, F., Wissel, H., Schachtrup, C., Tölle, A., Rüdiger, M., Spener, F.**  
647 **and Rüstow, B.** (2005). Inhibition of TNF $\alpha$  in vivo prevents hyperoxia-mediated  
648 activation of caspase 3 in type II cells. *Respiratory Research* **6**, 1465-1475.

649 **Haugland, R. P.** (2002). Handbook of fluorescent probes and research products.  
650 USA: Molecular Probes Inc.

651 **Hermes-Lima, M., Storey, J. M. and Storey, K. B.** (1998). Antioxidant  
652 defenses and metabolic depression. The hypothesis of preparation for oxidative stress in  
653 land snails. *Comp Biochem Phys* **120**, 437-48.

654 **Hermes-Lima, M. and Zenteno-Savin, T.** (2002). Animal response to drastic  
655 changes in oxygen availability and physiological oxidative stress. *Comp Biochem Phys*  
656 **133C**, 537-556.

657 **Hervant, F., Mathieu, J., Garin, D. and Fréminet, A.** (1995). Behavioral,  
658 ventilatory, and metabolic responses to severe hypoxia and subsequent recovery of the  
659 hypogean *Niphargus rhenorhodanensis* and the epigean *Gammarus fossarum*  
660 (Crustacea: Amphipoda). *Physiological Zoology* **68**, 223-244.

661 **Keij, J. F., Bell-Prince, C. and Steinkamp, J. A.** (2000). Staining of  
662 mitochondrial membranes with 10-nonyl acridine orange MitoFluor Green, and  
663 MitoTracker Green is affected by mitochondrial membrane potential altering drugs.  
664 *Cytometry* **39**, 203-210.

665 **Keller, M., Sommer, A. M., Pörtner, H. O. and Abele, D.** (2004). Seasonality  
666 of energetic functioning and production of reactive oxygen species by lugworm  
667 (*Arenicola marina*) mitochondria exposed to acute temperature changes. *Journal of*  
668 *Experimental Biology* **207**, 2529-38.

669 **Kristián, T. and Siesjö, B. K.** (1996). Calcium-related damage in ischemia. *Life*  
670 *Sciences* **59**, 357-367.

671 **Lagadic-Gossman, D., Huc, L. and Lecureur, V.** (2004). Alterations of  
672 intracellular pH homeostasis in apoptosis: origins and roles. *Cell death and*  
673 *differentiation* **11**, 953-961.

674 **Lushchak, V. I. and Bagnyukova, T. V.** (2006). Effects of different  
675 environmental oxygen levels on free radical processes in fish. *Comp Biochem Physiol B*  
676 *Biochem Mol Biol*.

677 **Matsuyama, S., Llopis, J., Deveraux, Q. L., Tsien, R. Y. and Reed, J. C.**  
678 (2000). Changes in intramitochondrial and cytosolic pH: early events that modulate  
679 caspase activation during apoptosis. *Nature cell biology* **2**, 318-325.

680 **Métivier, D., Dallaporta, B., Zamzami, N., Larochette, N., Susin, S. A.,**  
681 **Marzo, I. and Kroemer, G.** (1998). Cytofluorometric detection of mitochondrial  
682 alterations in early CD95/Fas/APO-1-triggered apoptosis of Jurkat T lymphoma cells.  
683 Comparison of seven mitochondrion-specific fluorochromes. *Immunology Letters* **61**,  
684 157-163.

685 **Mitsufuji, N., Yoshioka, H., Tominaga, M., Okano, S., Nishiki, T. and**  
686 **Sawada, T.** (1995). Intracellular alkalosis during hypoxia in newborn mouse brain in  
687 the presence of systemic acidosis: a phosphorus magnetic resonance spectroscopic  
688 study. *Brain and Development* **17**, 256-260.

689 **Monari, M., Matozzo, V., Foschi, J., Marin, M. G. and Cattani, O.** (2005).  
690 Exposure to anoxia of the clam, *Chamelea gallina*: II: Modulation of superoxide  
691 dismutase activity and expression in haemocytes. *Journal of Experimental Marine*  
692 *Biology and Ecology* **325**, 175.

693 **Morrill, A. C., Powell, E. N., Bidigare, R. R. and Shick, J. M.** (1988).  
694 Adaptations to life in the sulfide system: a comparison of oxygen detoxifying enzymes  
695 in thiobiotic and oxybiotic meiofauna (and freshwater planarians). *Journal of*  
696 *Comparative Physiology B: Biochemical, Systemic, and Environmental Physiology* **158**,  
697 335-344.

698 **Morris, J., Ladurner, P., Rieger, R., Pfister, D., Del Mar De Miguel-Bonet,**  
699 **M., Jacobs, D. and Hartenstein, V.** (2006). The *Macrostomum lignano* EST database  
700 as a molecular resource for studying platyhelminth development and phylogeny.  
701 *Development Genes and Evolution* **216**, 695-707.

702 **Mouton, S., Willems, M., Braeckman, B. P., Egger, B., Ladurner, P.,**  
703 **Schärer, L. and Borgonie, G.** (2009). The free-living flatworm *Macrostomum lignano*:  
704 A new model organism for ageing research. *Experimental Gerontology* **44**, 243-249.

705 **Mulkey, D. K., Stornetta, R. L., Weston, M. C., Simmons, J. R., Parker, A.,**  
706 **Bayliss, D. A. and Guyenet, P. G.** (2004). Respiratory control by ventral surface  
707 chemoreceptor neurons in rats. *Nat Neurosci* **7**, 1360-1369.

708 **Pfannkuche, O. and Thiel, H.** (1988). Sample processing. In *Introduction to*  
709 *the study of meiofauna*, eds. R. P. Higgins and H. Thiel), pp. 134-145. Washington:  
710 Smithsonian Institution.

711 **Pfister, D., De Mulder, K., Phillip, I., Kuales, G., Hrouda, M., Eichberger,**  
712 **P., Borgonie, G., Hartenstein, V. and Ladurner, P.** (2007). The exceptional stem cell  
713 system of *Macrostomum lignano*: screening for gene expression and studying cell  
714 proliferation by hydroxyurea treatment and irradiation. *Frontiers in Zoology* **4**.

715 **Rosenberg, R., Hellman, B. and Johansson, B.** (1991). Hypoxic tolerance of  
716 marine benthic fauna. *Marine Ecology Progress Series* **79**, 127-131.

717 **Sastre, J., Pallardo, F. V. and Vina, J.** (2000). Mitochondrial oxidative stress  
718 plays a key role in aging and apoptosis. *IUBMB Life* **49**, 427-435.

719 **Schärer, L., Sandner, P. and Michiels, N. K.** (2005). Trade-off between male  
720 and female allocation in the simultaneously hermaphroditic flatworm *Macrostomum* sp.  
721 *Journal of Evolutionary Biology* **18**, 396-404.

722 **Silver, R. B.** (2003). Ratio Imaging: Measuring Intracellular Ca<sup>++</sup> and pH in  
723 Living Cells. In *Methods in Cell Biology*, vol. Volume 72 eds. W. Leslie and M. Paul),  
724 pp. 369-387: Academic Press.

725 **Tang, P.-S.** (1933). On the Rate of Oxygen Consumption by Tissues and Lower  
726 Organisms as a Function of Oxygen Tension. *The Quarterly Review of Biology* **8**, 260-  
727 274.

728 **Thomas, J. A., Buchsbaum, R. N., Zimniak, A. and Racker, E.** (1979).  
729 Intracellular pH measurements in Ehrlich ascites tumor cells utilizing spectroscopic  
730 probes generated in situ. *Biochemistry* **18**, 2210-2218.

731 **Tinson, S. and Laybourn-Parry, J.** (1985). The behavioural responses and  
732 tolerance of freshwater benthic cyclopoid copepods to hypoxia and anoxia.  
733 *Hydrobiologia* **127**, 257-263.

734 **Turrens, J. F.** (2003). Mitochondrial formation of reactive oxygen species. *The*  
735 *Journal of Physiology* **552**, 335-344.

736 **Turrens, J. F., Freeman, B. A., Levitt, J. G. and Crapo, J. D.** (1982). The  
737 effect of hyperoxia on superoxide production by lung submitochondrial particles.  
738 *Archives of Biochemistry and Biophysics* **217**, 401-410.

739 **Vanden Hoek, T. L., Li, C., Shao, Z., Schumacker, P. T. and Becker, L. B.**  
740 (1997). Significant Levels of Oxidants are Generated by Isolated Cardiomyocytes  
741 During Ischemia Prior to Reperfusion. *Journal of Molecular and Cellular Cardiology*  
742 **29**, 2571-2583.

743 **Webb, B. A., Chimenti, M., Jacobson, M. P. and Barber, D. L.** (2011).  
744 Dysregulated pH: a perfect storm for cancer progression. *Nature Reviews: Cancer* **11**,  
745 671-677.

746 **Wetzel, M. A., Fleeger, J. W. and Powers, S. P.** (2001). Effects of hypoxia and  
747 anoxia on meiofauna: a review with new data from the Gulf of Mexico. *Coastal and*  
748 *Estuarine Studies* **58**, 165-184.

749 **Wheatly, M. G. and Toop, T.** (1989). Physiological responses of the crayfish  
750 *Pacifastacus leniusculus* to environmental hyperoxia: II. Role of the antennal gland in  
751 acid-base and ion regulation. *Journal of Experimental Biology* **143**, 53-70.



752  
753

754 FIGURE CAPTIONS

755

756 Fig. 1: Quantification process of the resulting confocal images: a total of 5 transects  
757 were used for each of the animals under study. These were always perpendicular to the  
758 longitudinal axis of the animal and were located on the areas with the highest  
759 fluorescence intensities. A. Animal stained with MitoTracker Deep Red 633. B.  
760 Transmission image of the same individual.

761

762 Fig. 2: Oxygen consumption rates of *Macrostomum lignano* at different environmental  
763 oxygen partial pressures (kPa). Values are pooled in 1% intervals. Black dots represent  
764 mean oxygen consumption rates for the 10 replicas conducted, while grey diamonds  
765 represent the values obtained for animals that were, after reaching anoxia, further  
766 reoxygenated. Whiskers represent the s.e.m.  $p_{c1}$ = upper critical oxygen partial pressure;  
767  $p_{c2}$ = low critical oxygen partial pressure

768

769 Fig. 3: Bar diagrams showing the quantitative results obtained for the pH measurements  
770 through A) Ageladine-A staining and B) BCECF staining (obtained with the confocal  
771 microscope). Subfigures 1 (A1 and B1) show the results corresponding to one  
772 individual replica of the experiment. Since for each case the pattern was consistent  
773 throughout the replicas, data was normalized and pooled (refer to materials and methods  
774 section for more details). The corresponding results are shown in subfigures 2 (A2 and  
775 B2). Whiskers represent the s.e.m. N=number of replicas conducted.

776

777

778 Fig. 4: Staining of *M. lignano* with MitoTracker Deep Red 633. A) Transmission image  
779 of *M. lignano*. B) MitoTracker Deep Red 633 fluorescence of the same individual and  
780 showing how the highest mitochondrial densities can be found in the animals' body  
781 wall, in epithelial and muscle cells. C) View of the head showing how high  
782 mitochondrial density is also registered around the mouth (white arrow).

783

784

785 Fig. 5: Bar diagrams showing the quantitative results obtained for the mitochondrial  
786 measurements through A) MitoTracker Green FM and B) MitoTracker Deep Red 633  
787 staining for the assessment of mitochondrial density and C) JC-1 staining for the  
788 determination of mitochondrial membrane potential ( $\Delta\psi_m$ ). Subfigures 1 (A1, B1, C1)  
789 show the results corresponding to one individual replica of the experiment. Since for  
790 each case the pattern was consistent throughout the replicas (except for MitoTracker  
791 Deep Red 633), data was normalized and pooled (refer to materials and methods section  
792 for more details). The corresponding results are shown in subfigures 2 (A2, B2, C2).  
793 Whiskers represent the s.e.m. N=number of replicas conducted.

794

795 Fig. 6: High resolution fluorescence images of individual cells of *M. lignano* stained  
796 with MitoTracker Green FM under anoxic (A) and normoxic (B) conditions. Confocal  
797 imagery. Scale bar=15 $\mu$ m.

798

799

800 Fig. 7: Bar diagrams showing the quantitative results obtained in the ROS quantification  
801 through A) DHE and B) C-H<sub>2</sub>DFFDA staining. Subfigures 1 (A1, B1) show the results  
802 corresponding to one individual replica of the experiment. Since for each case the  
803 pattern was consistent throughout the replicas, data was normalized and pooled (refer to

804 materials and methods section for more details). The corresponding results are shown in  
805 subfigures 2 (A2, B2). Whiskers represent the s.e.m. N=number of replicas conducted.

806

807 Fig. 8: Results on the effect of the inhibition of SOD under anoxic conditions: (a) effect  
808 of SOD and SDT on anoxic animals. Groups associated with the same letter (a-b-c-d)  
809 belong to the same subset based on a *a-posteriori* multiple comparison test Student-  
810 Newman-Keuls (S.N.K.) ( $K=27.41$ ;  $p<0.001$ ); (b) effect of SOD on the concentrations  
811 of  $O_2^-$  (DHE values) (b1) and  $H_2O_2$  (C-H<sub>2</sub>DFFDA values) (b2) in anoxic animals.  
812 Whiskers represent the s.e.m. \*\*\*  $p<0.001$ .

813

814

815 SUPPLEMENTARY MATERIAL CAPTIONS

816

817 Fig. 1: Representative fluorescence images obtained during the pH measurements under  
818 the confocal microscope for each of the treatments considered. A) Ageladine-A  
819 staining. B) BCECF staining.

820

821 Fig. 2: Wide-field fluorescing imaging of *M. lignano* individuals stained with BCECF  
822 under the four treatments considered in the study: a) anoxia followed by reoxygenation,  
823 b) Near anoxia, c) Normoxia and d) Hyperoxia.

824

825 Fig. 3: Representative fluorescence images obtained during the mitochondrial  
826 measurements under the confocal microscope for each of the treatments considered. Use  
827 of A) MitoTracker Green Fm and (B) MitoTracker Deep Red 633 for mitochondrial  
828 mass estimation and (C) JC-1 for  $\Delta\psi_m$  calculation.

829

830 Fig. 4: Representative fluorescence images obtained during ROS quantification under  
831 the confocal microscope for each of the treatments considered. Use of A) DHE and B)  
832 C-H<sub>2</sub>DFFDA for O<sub>2</sub>• and H<sub>2</sub>O<sub>2</sub> quantification, respectively.



**A**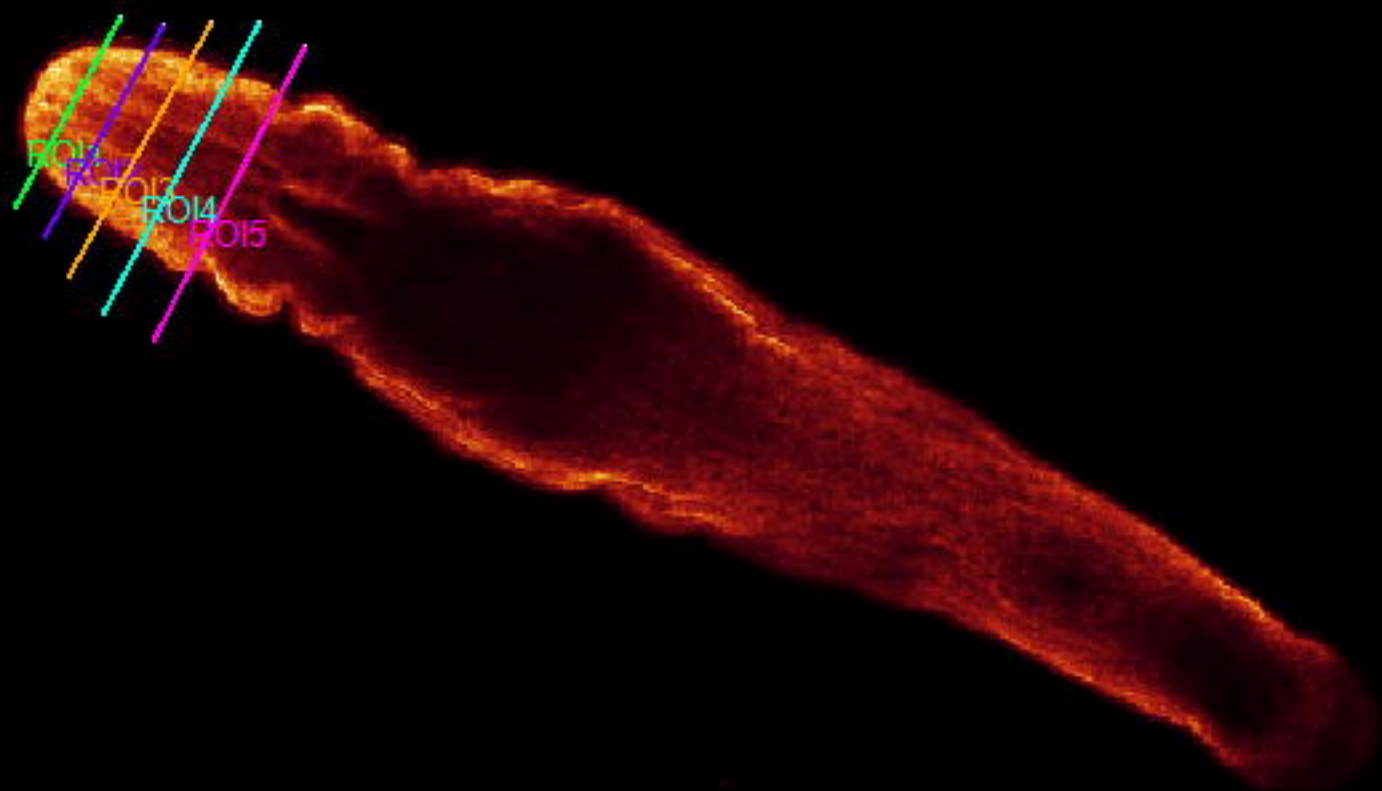**B**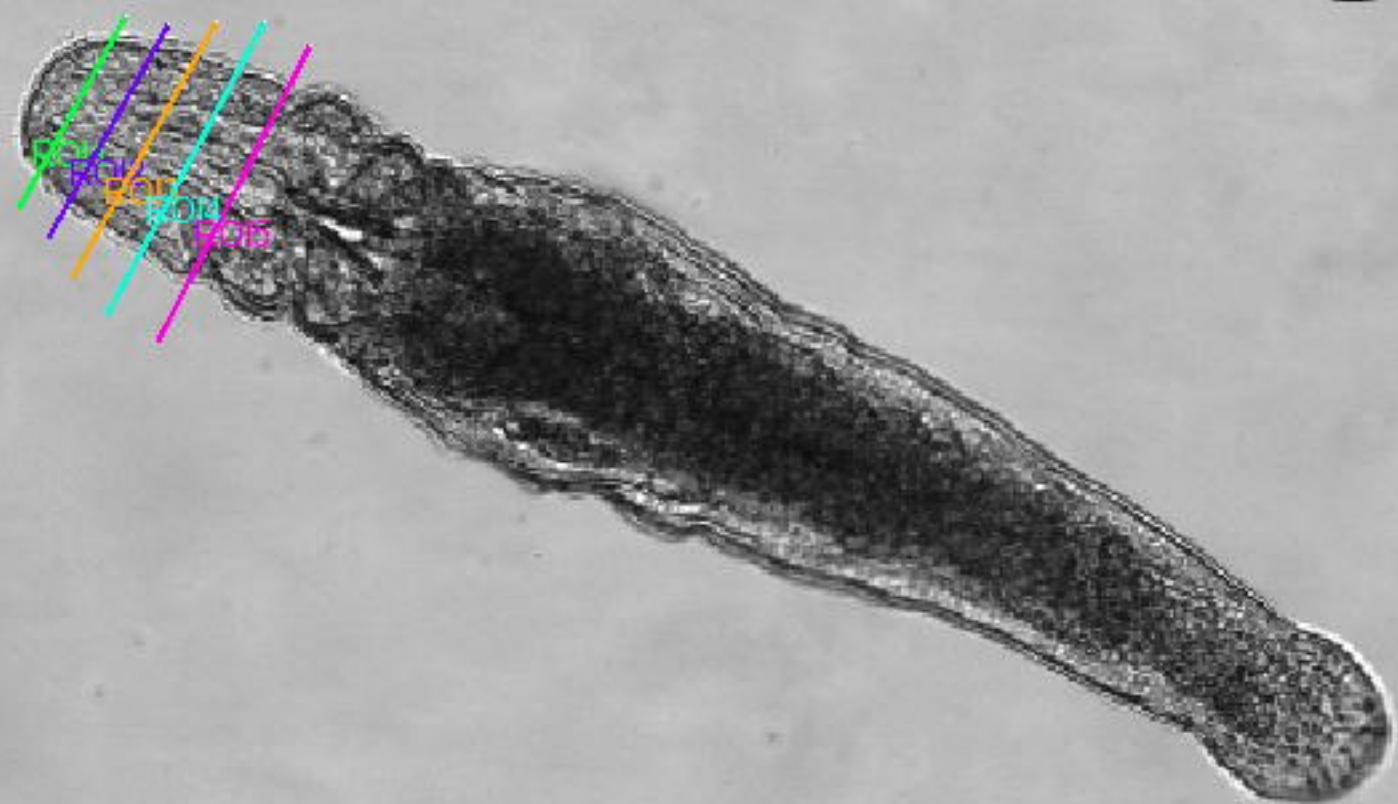

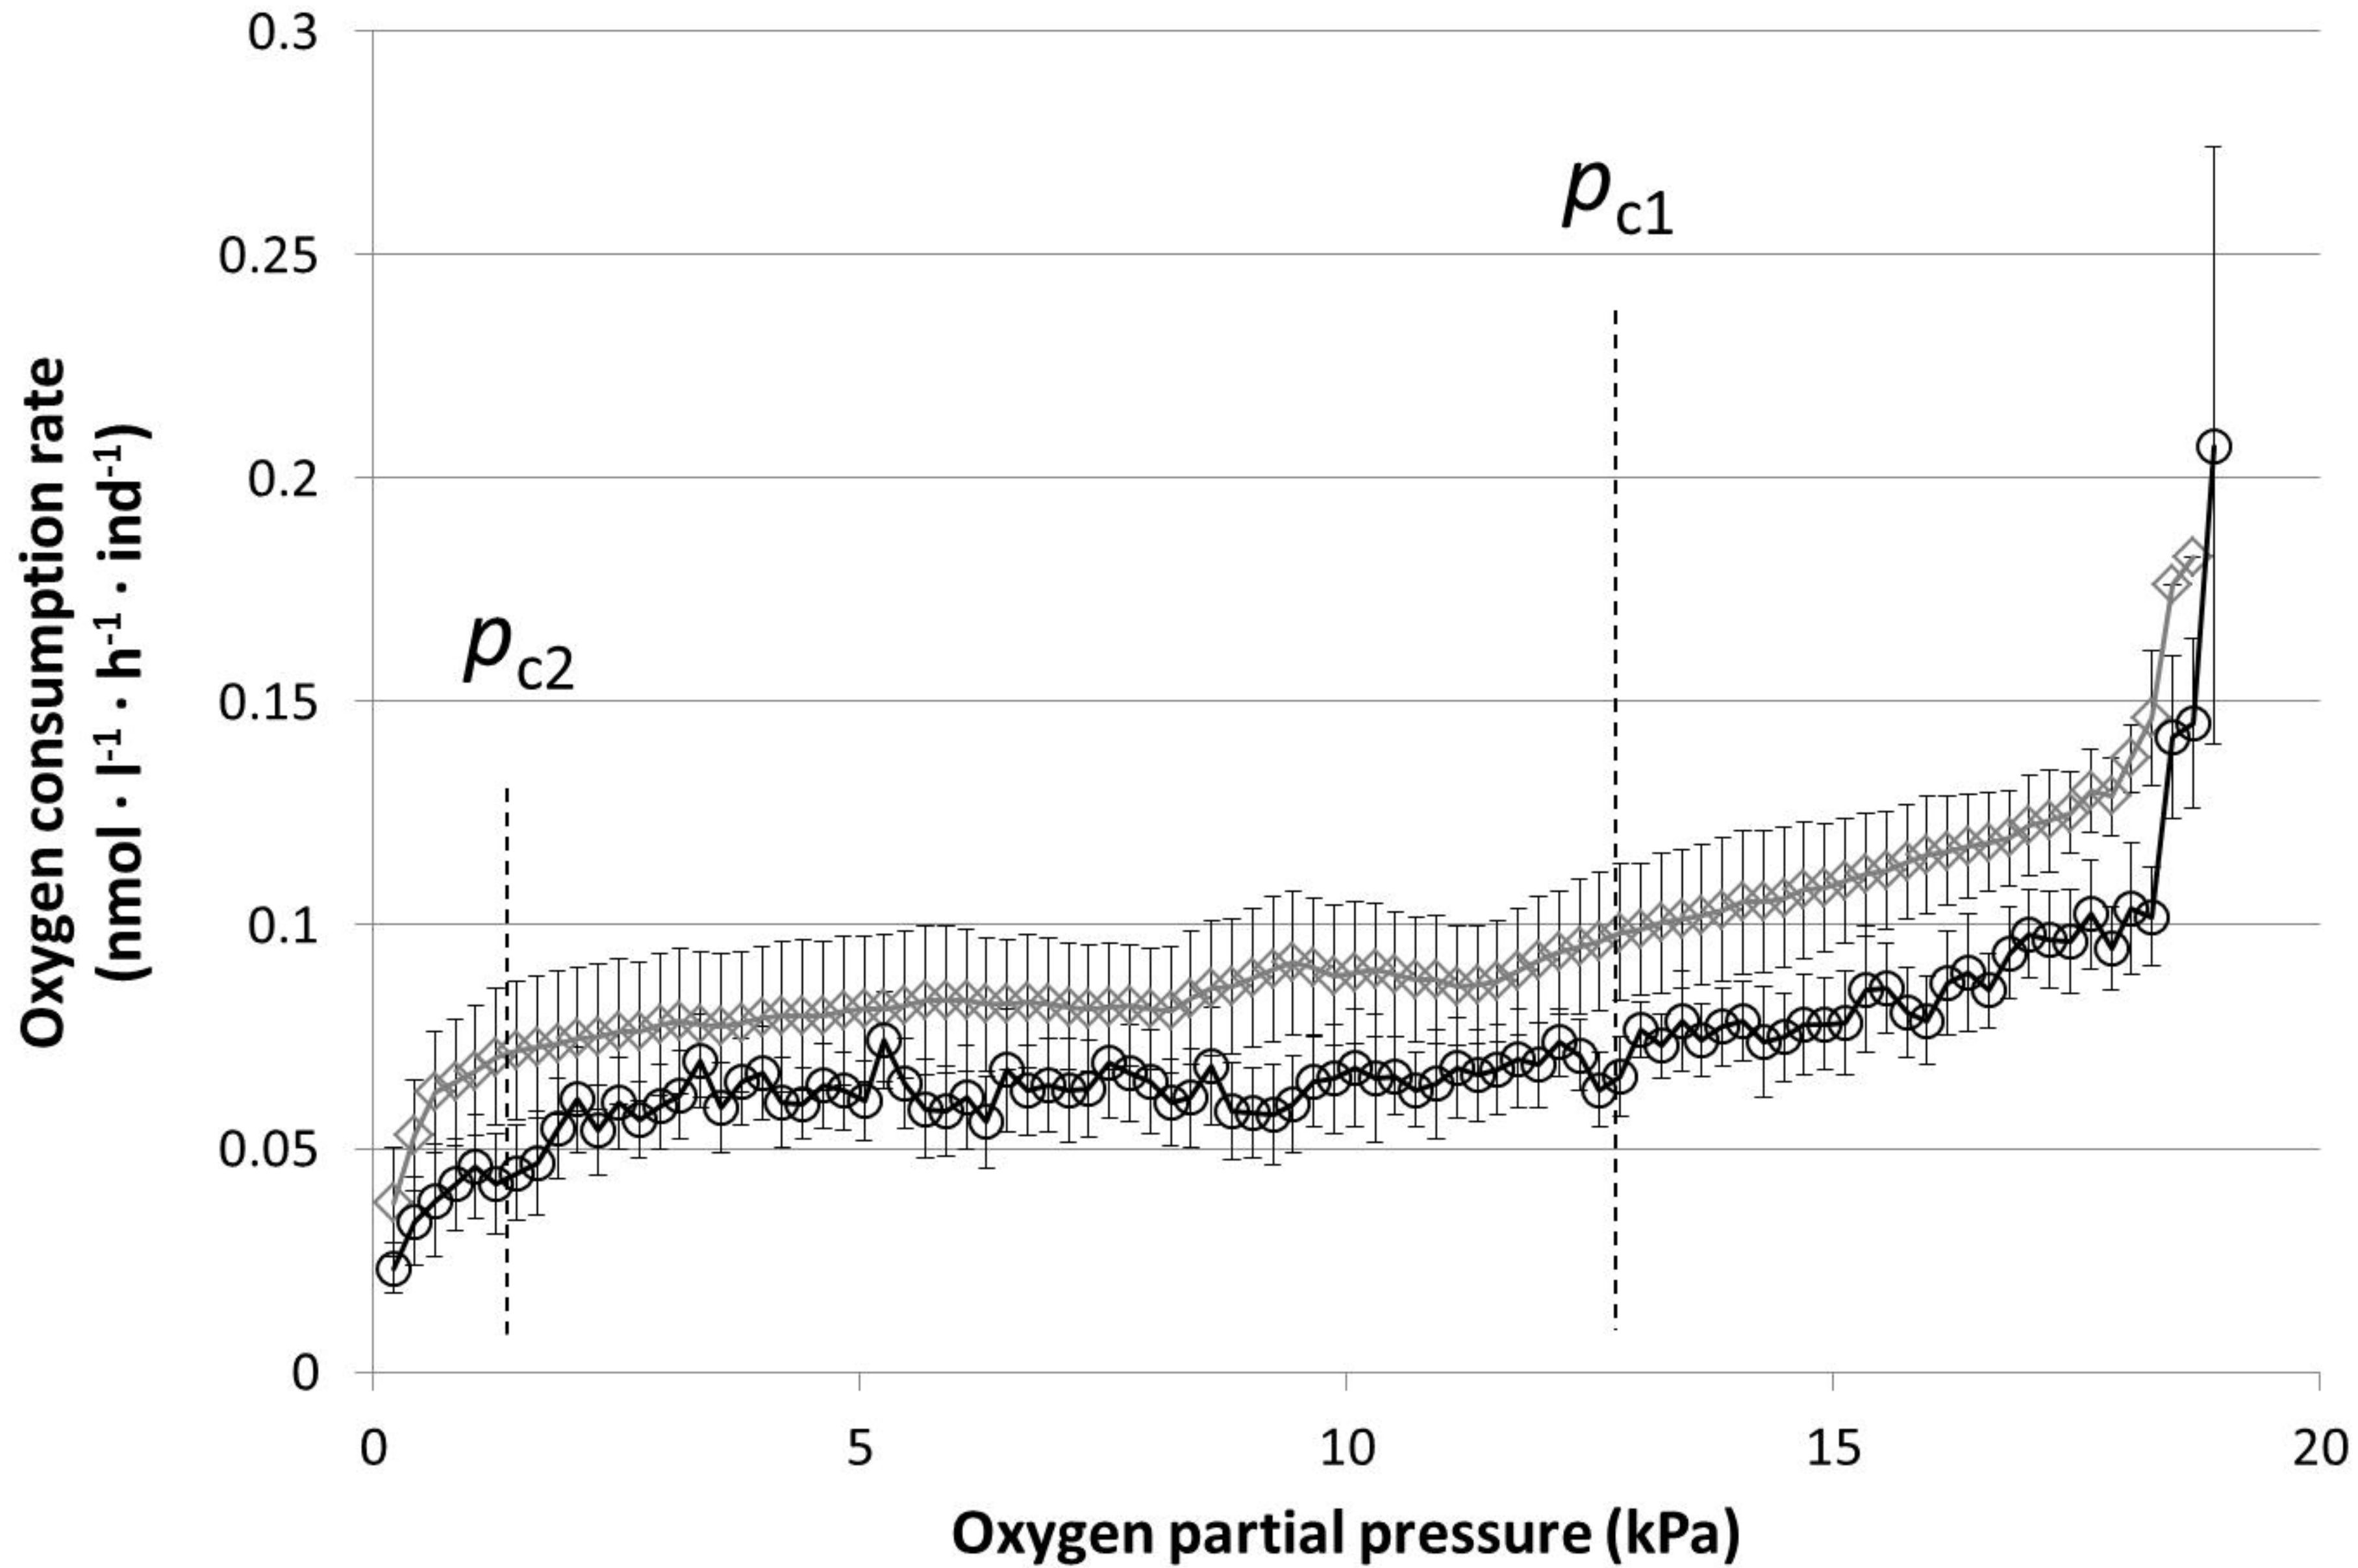

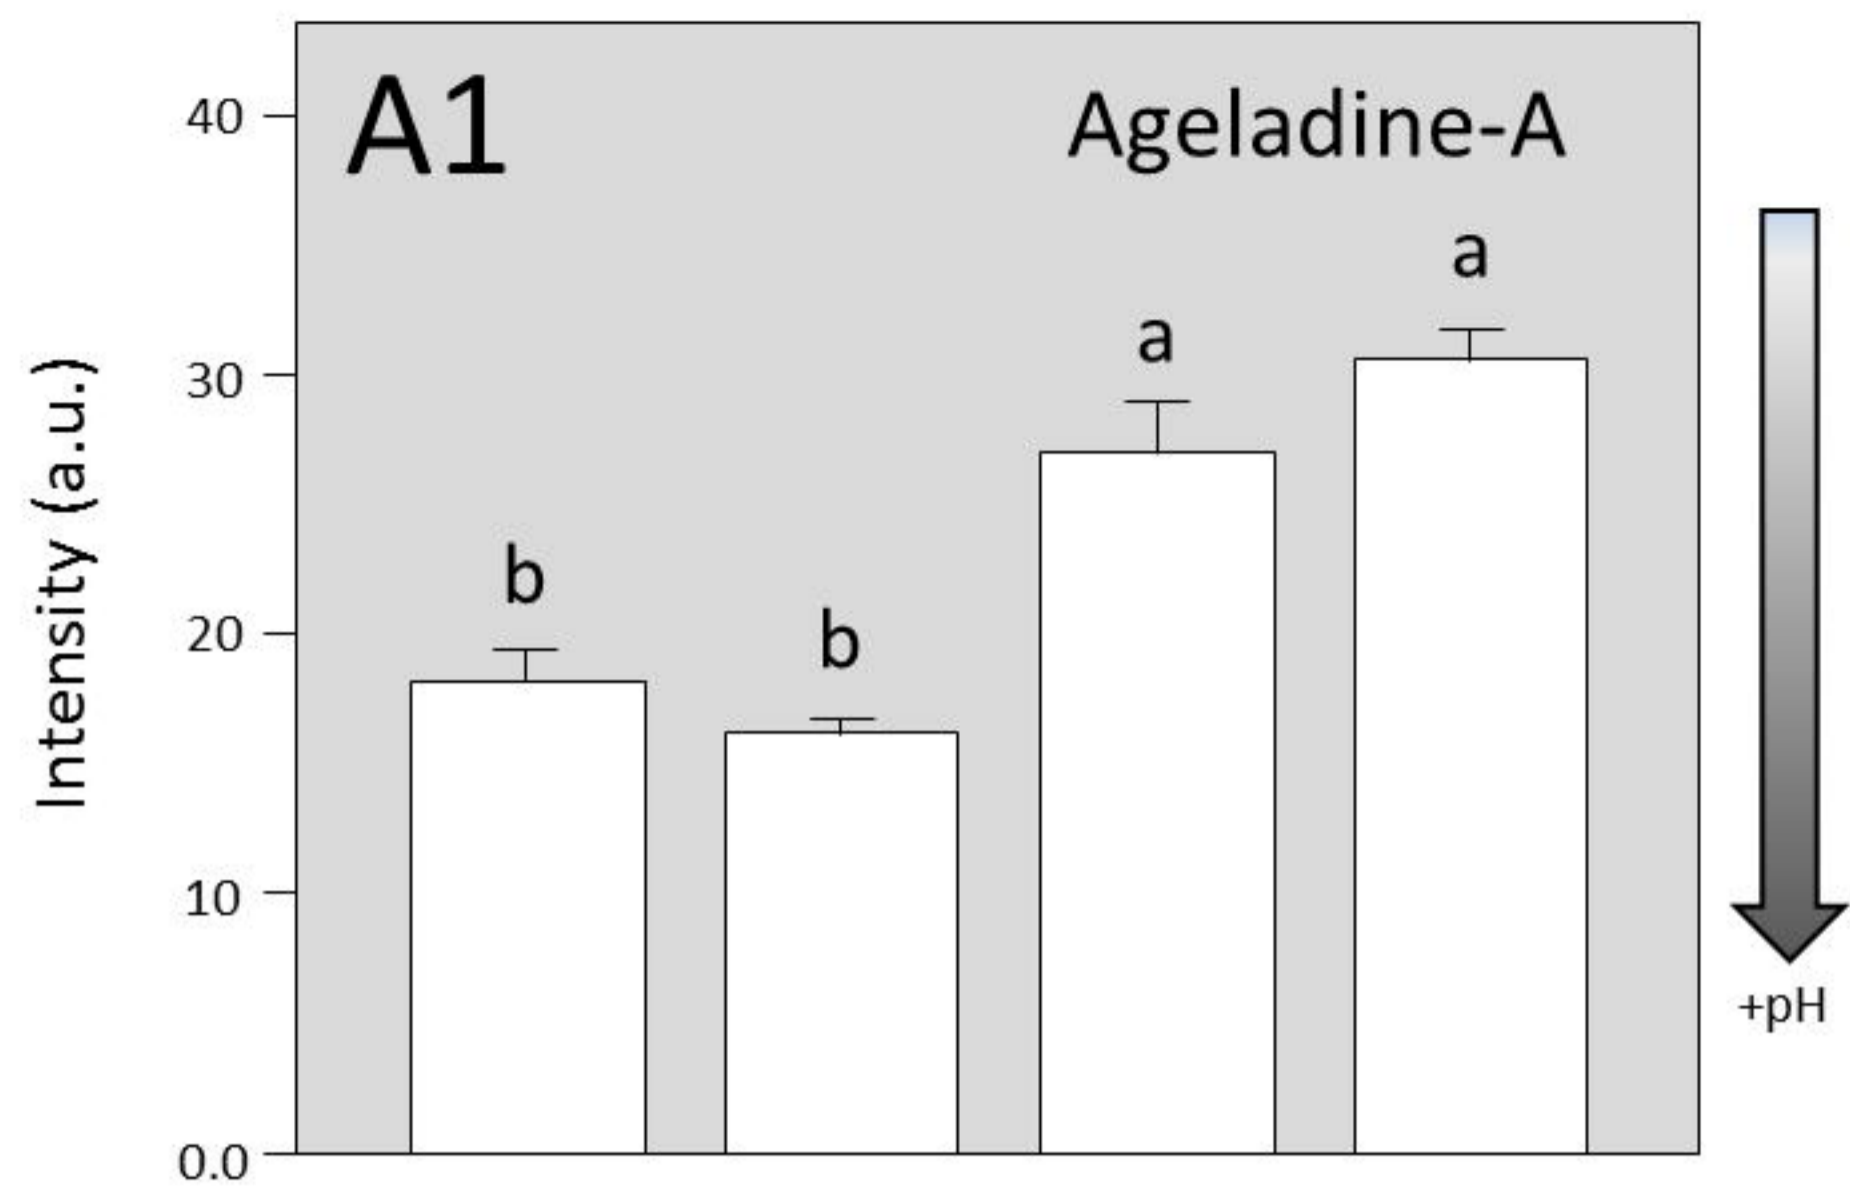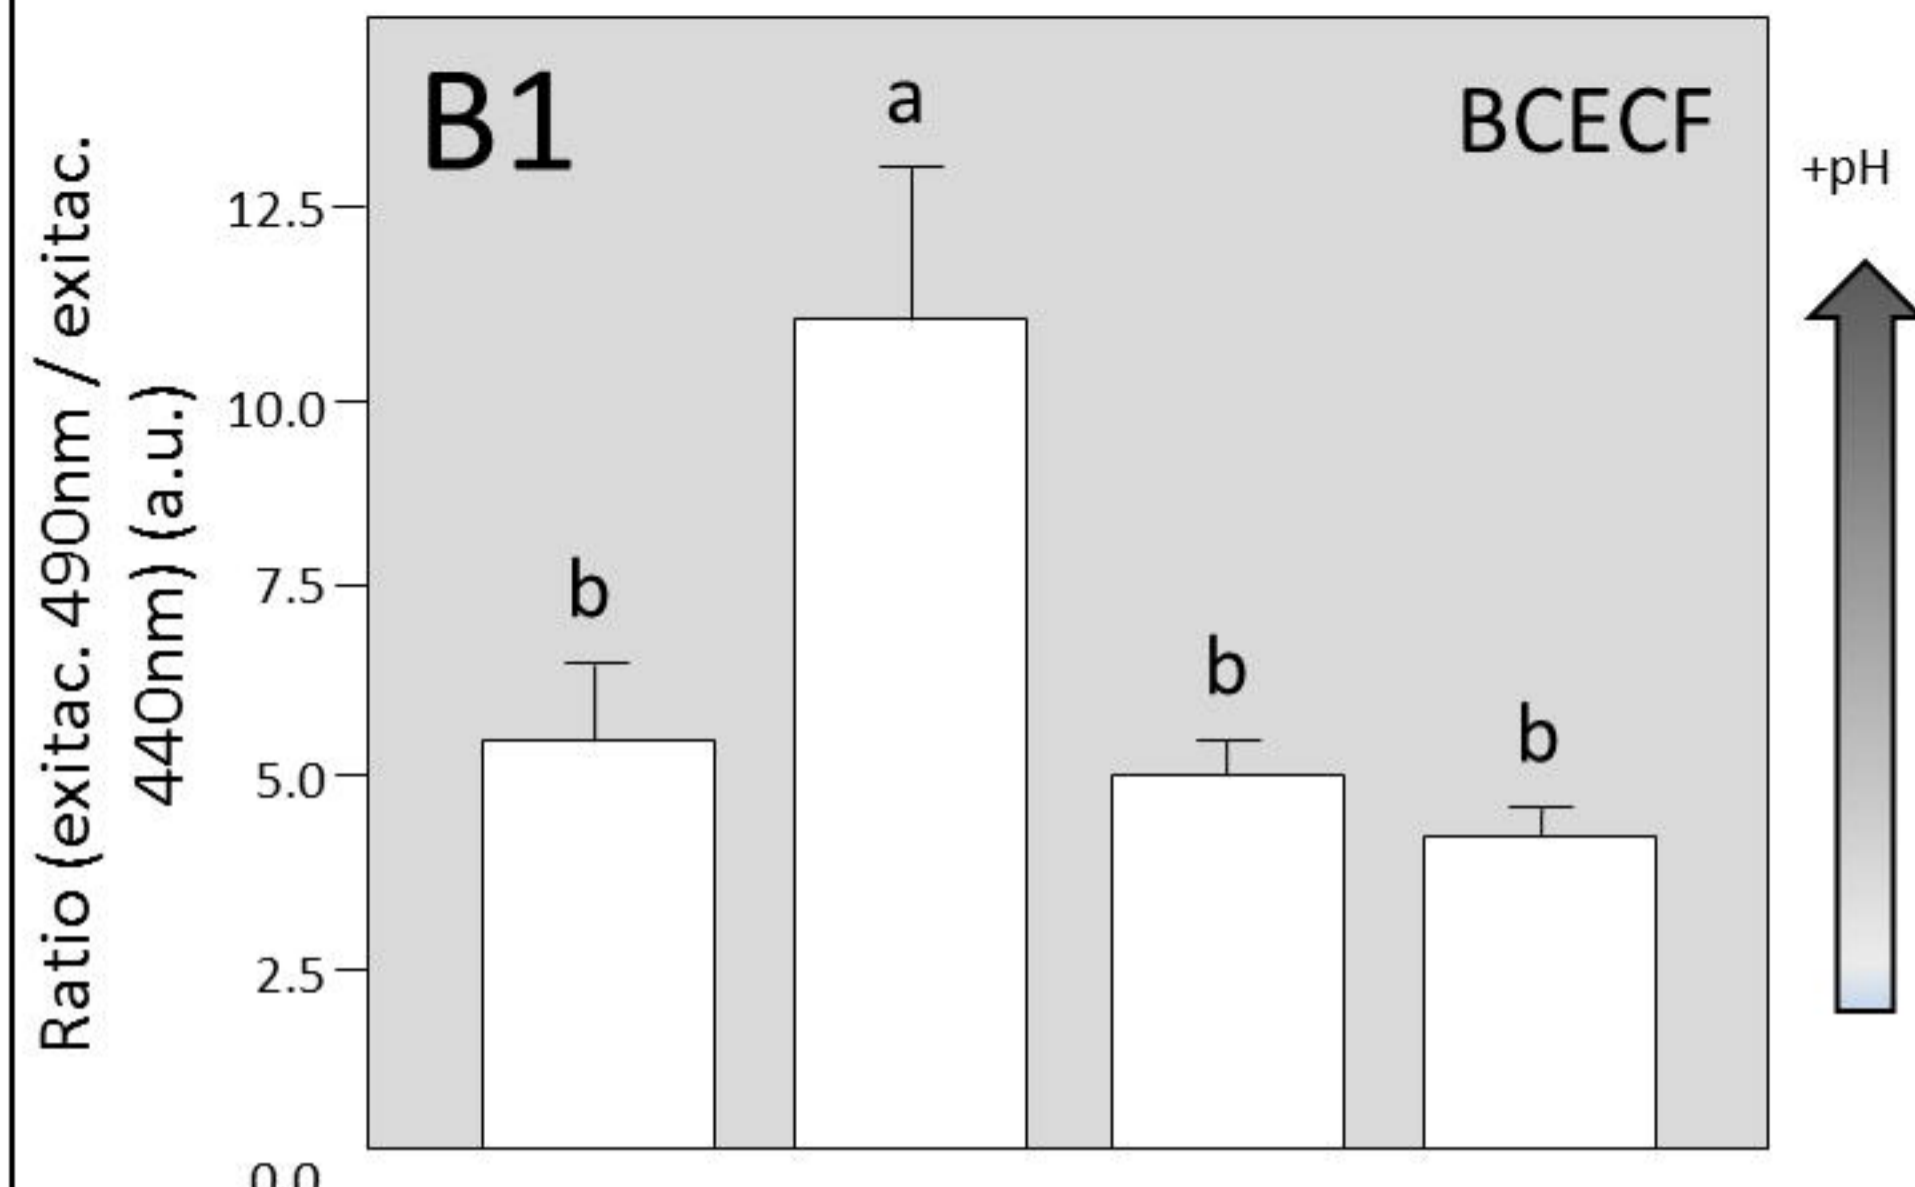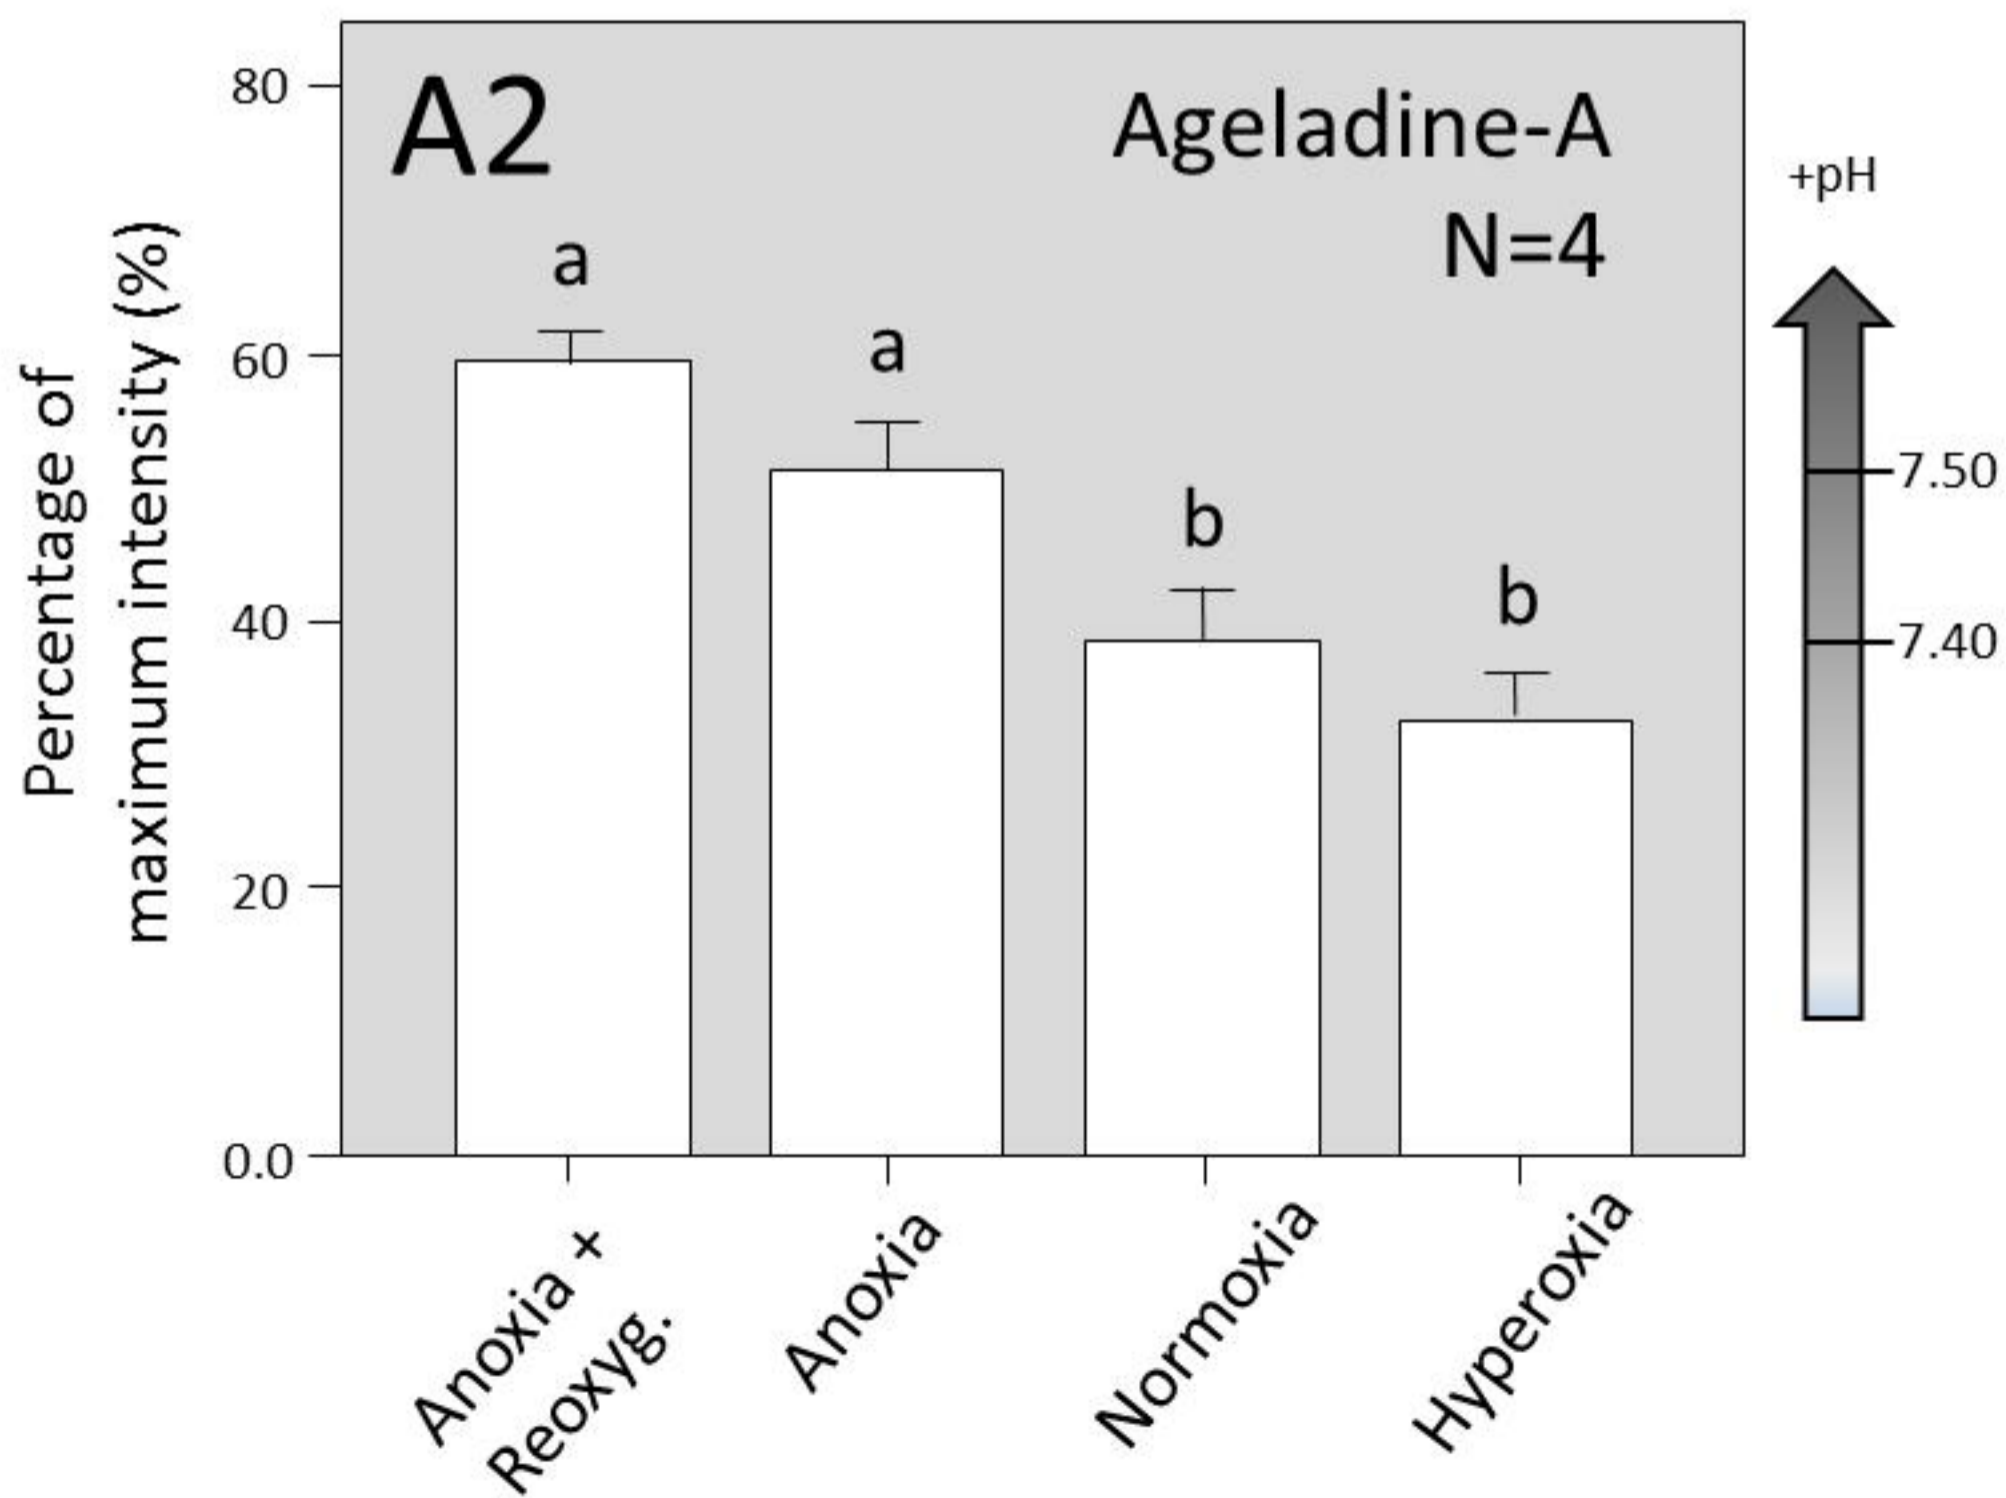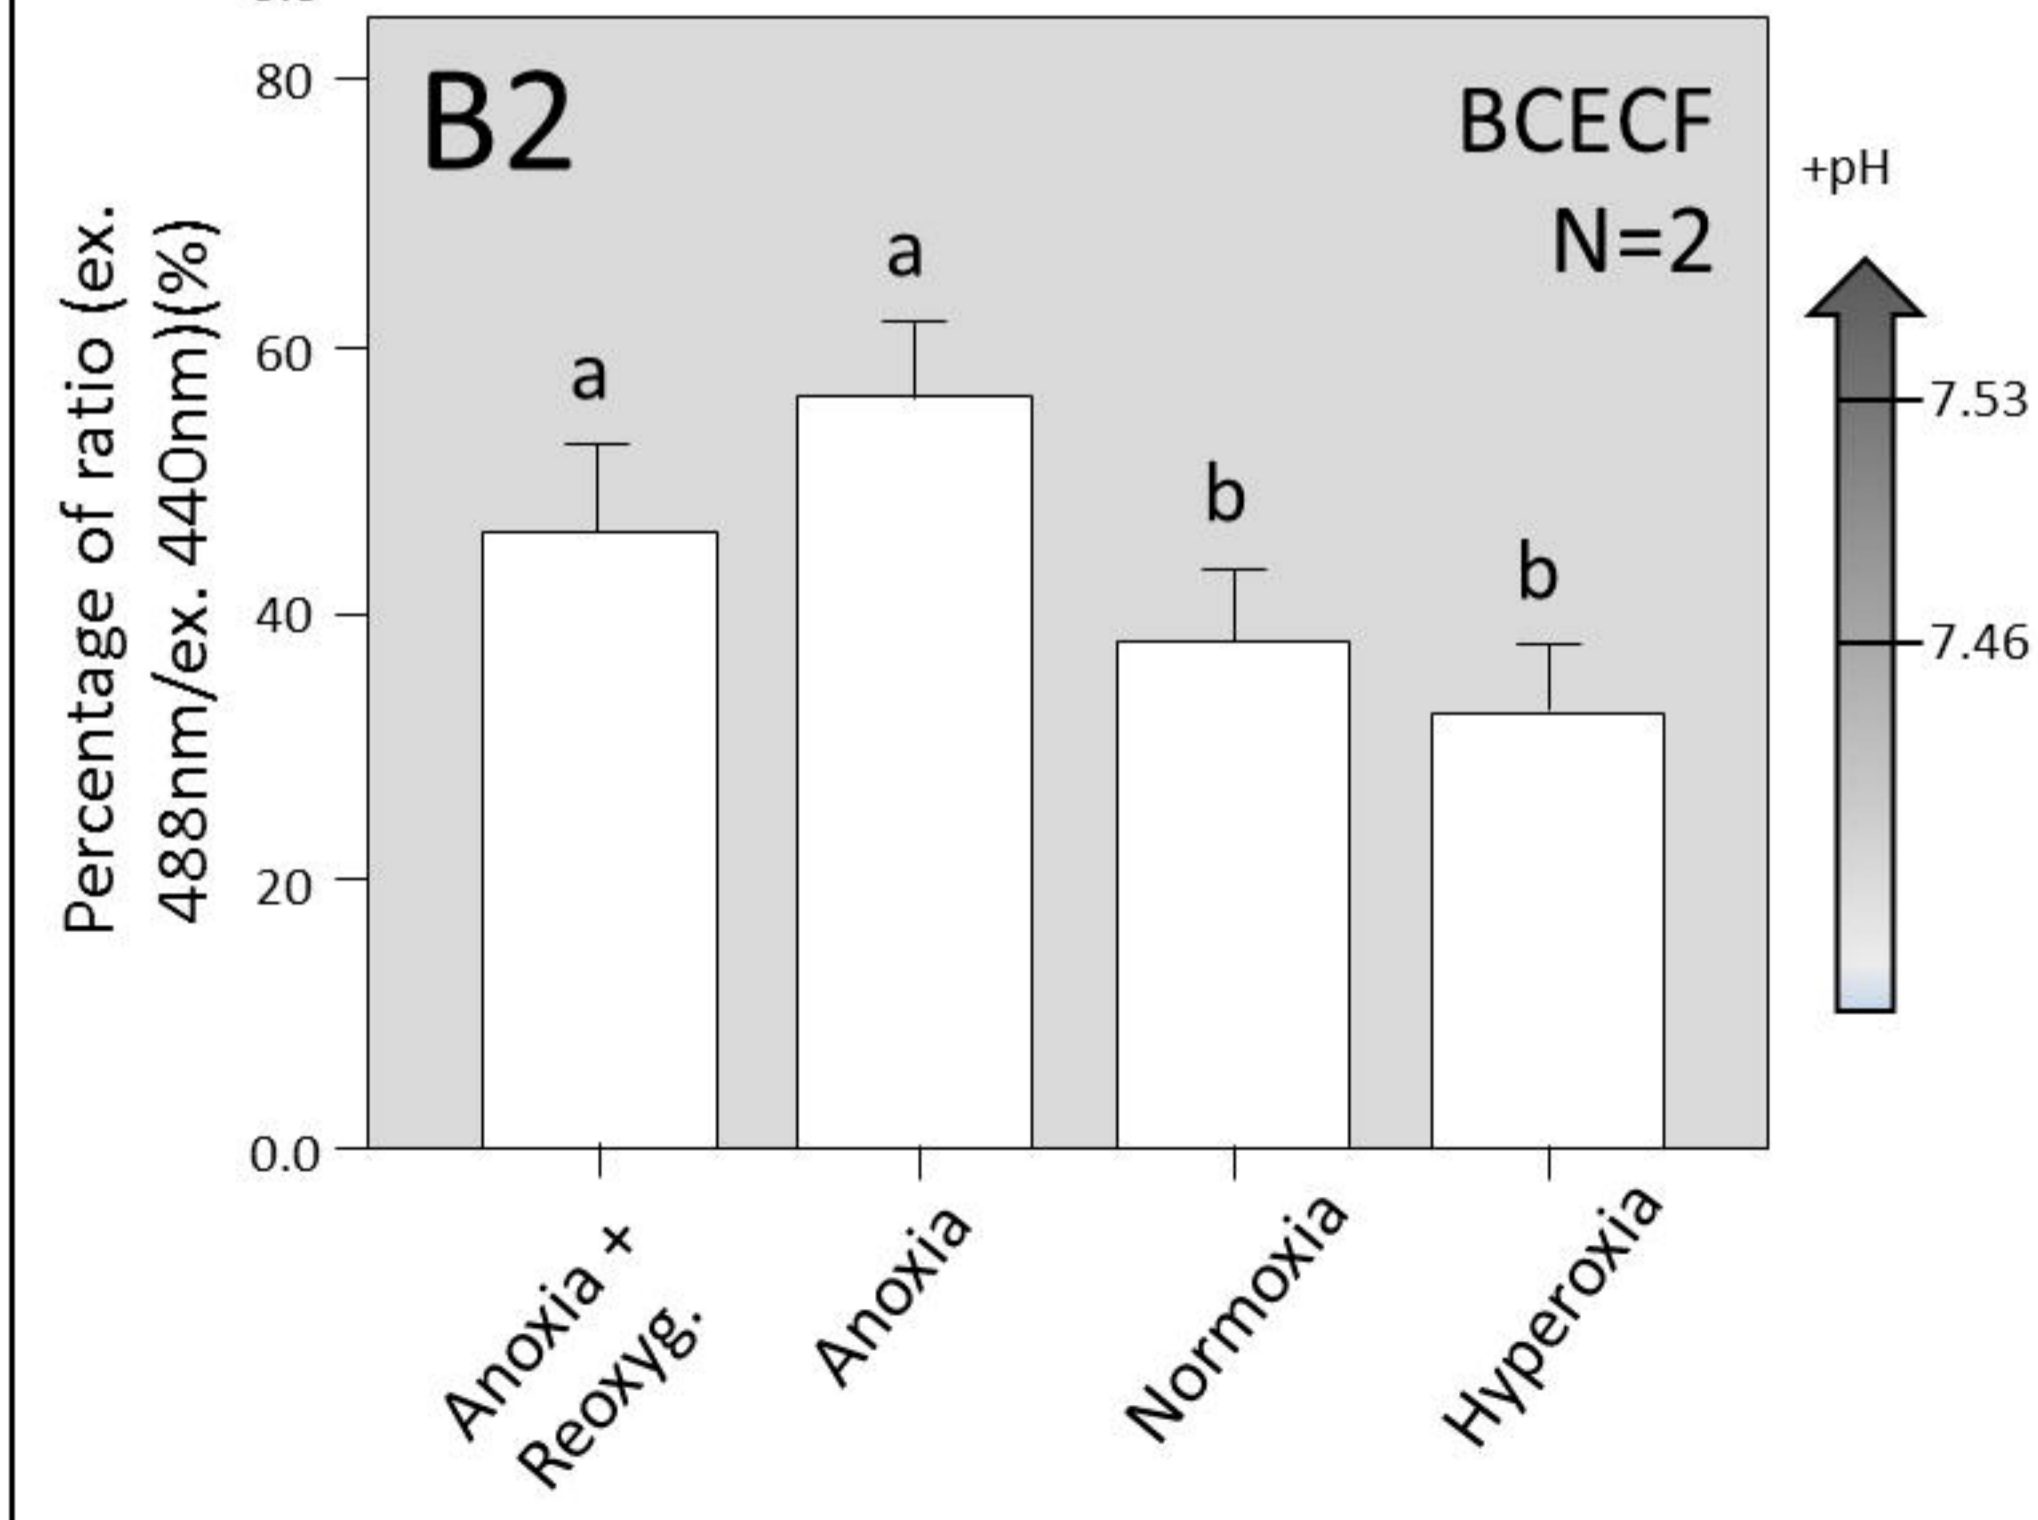



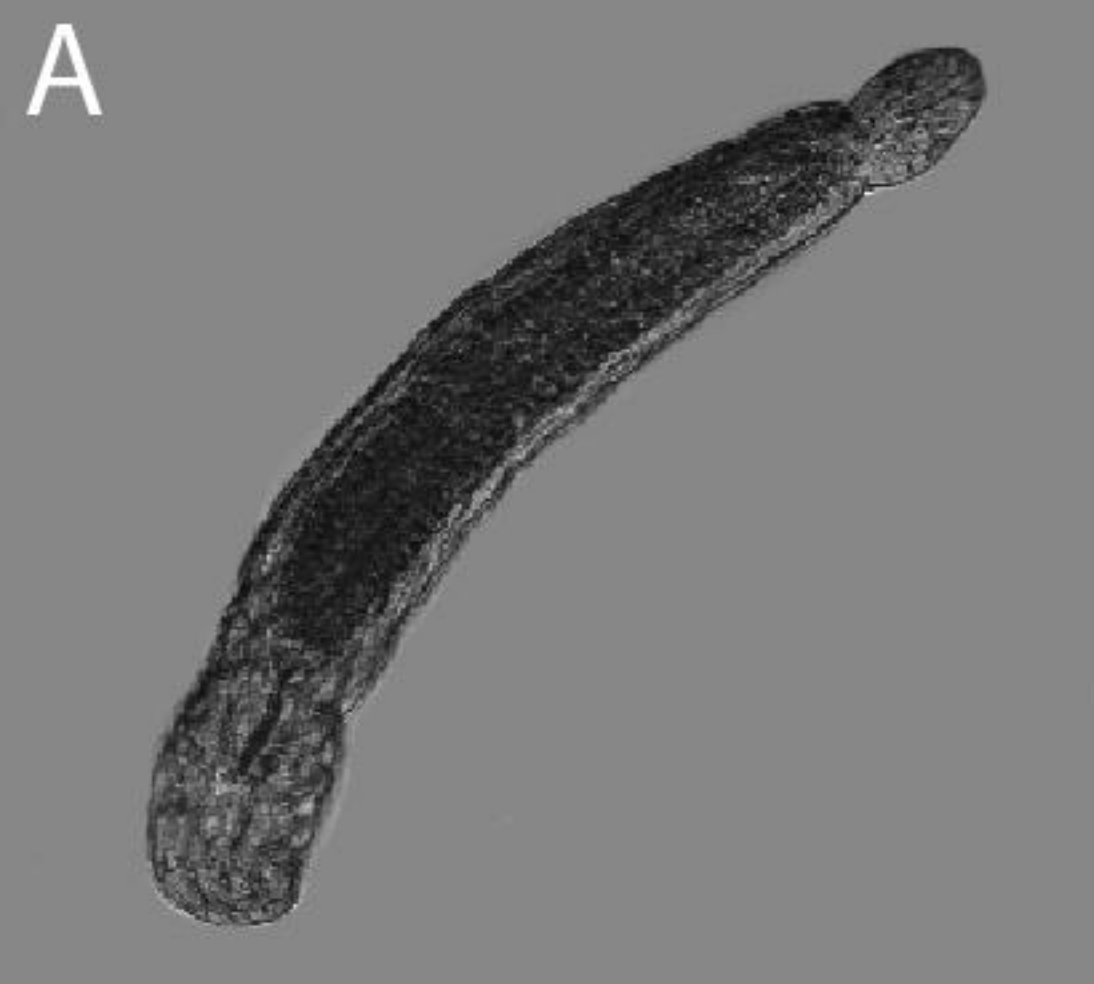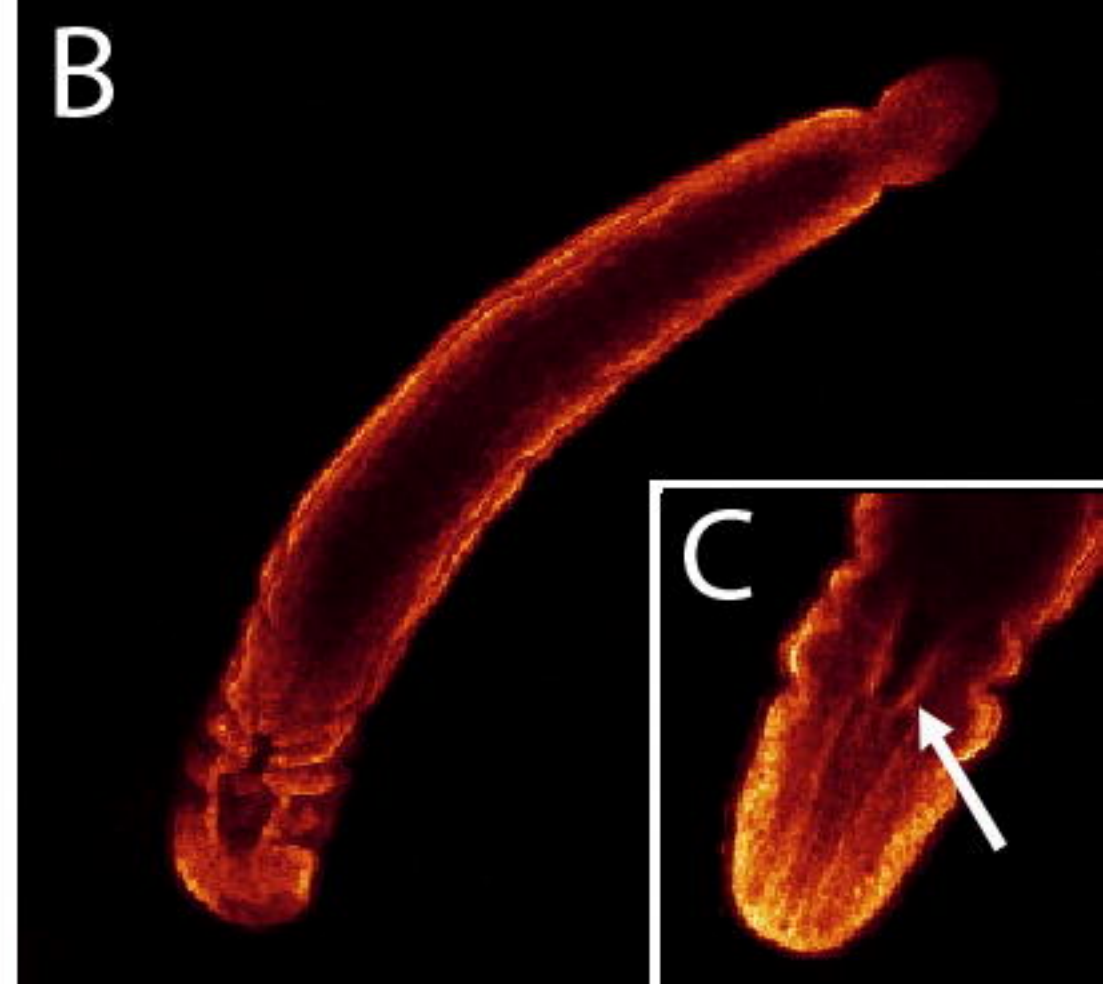

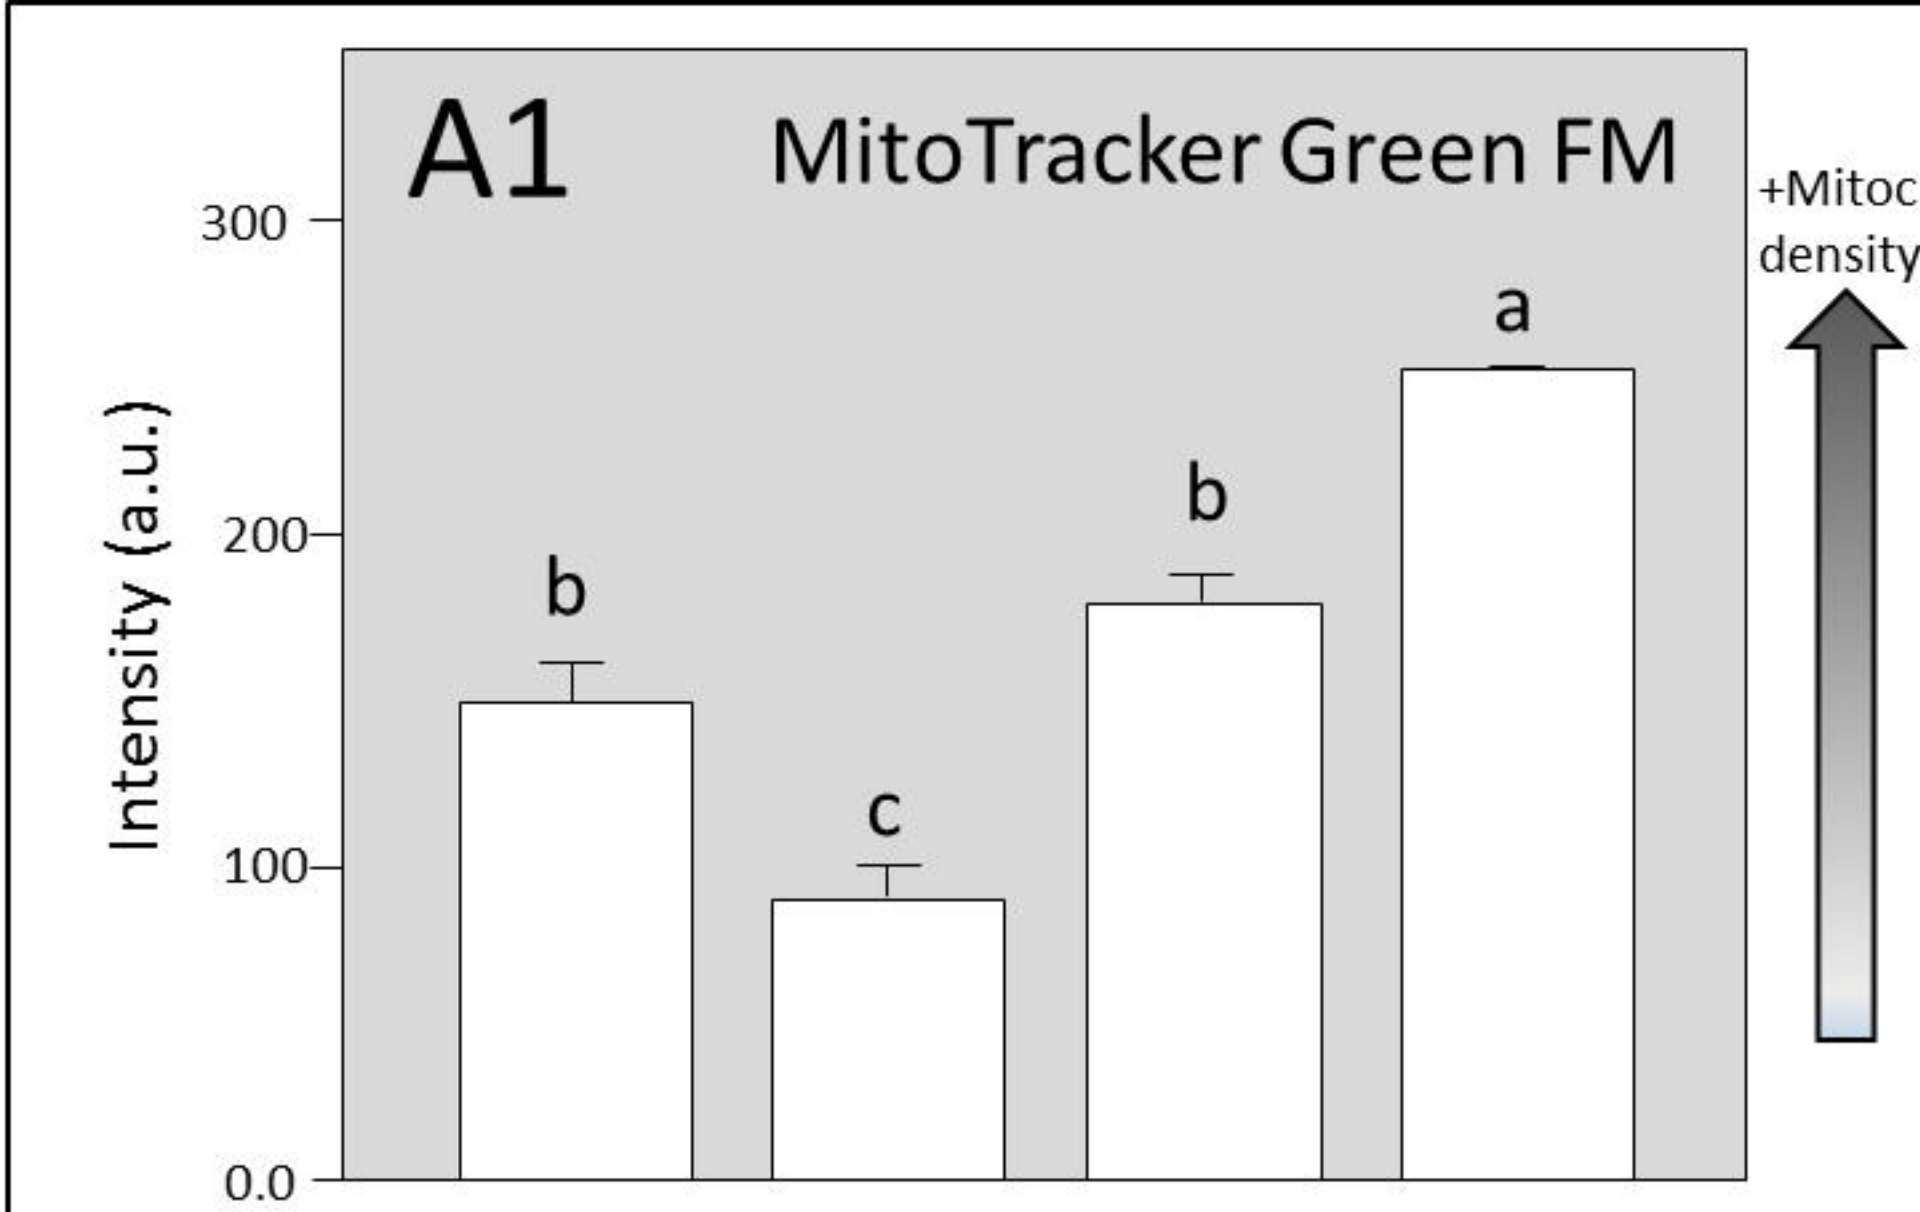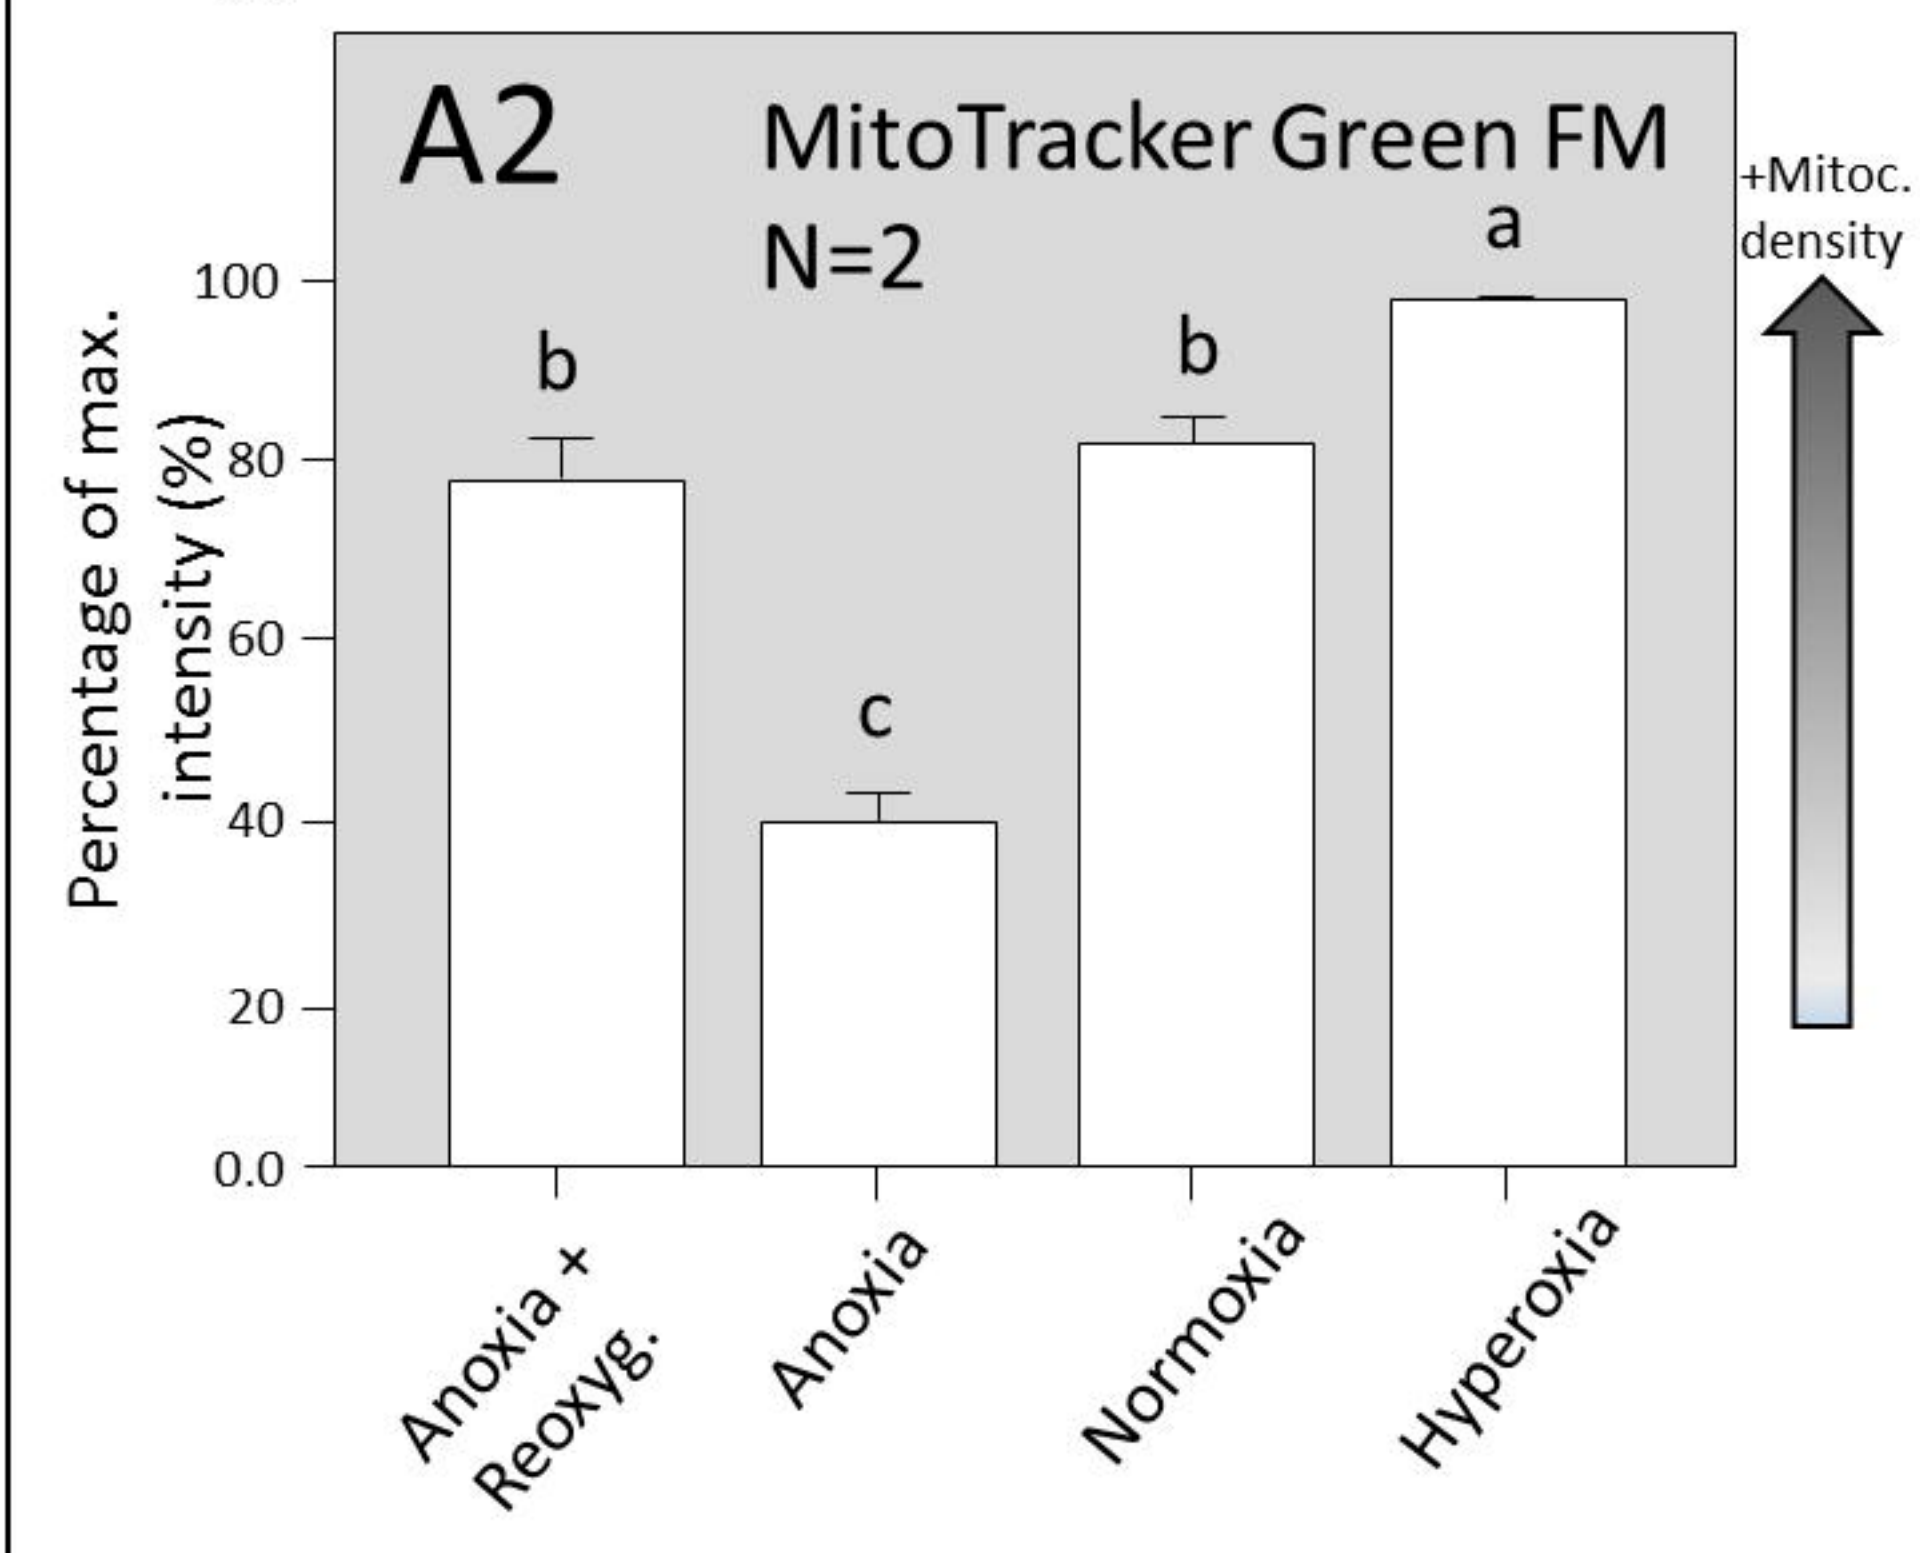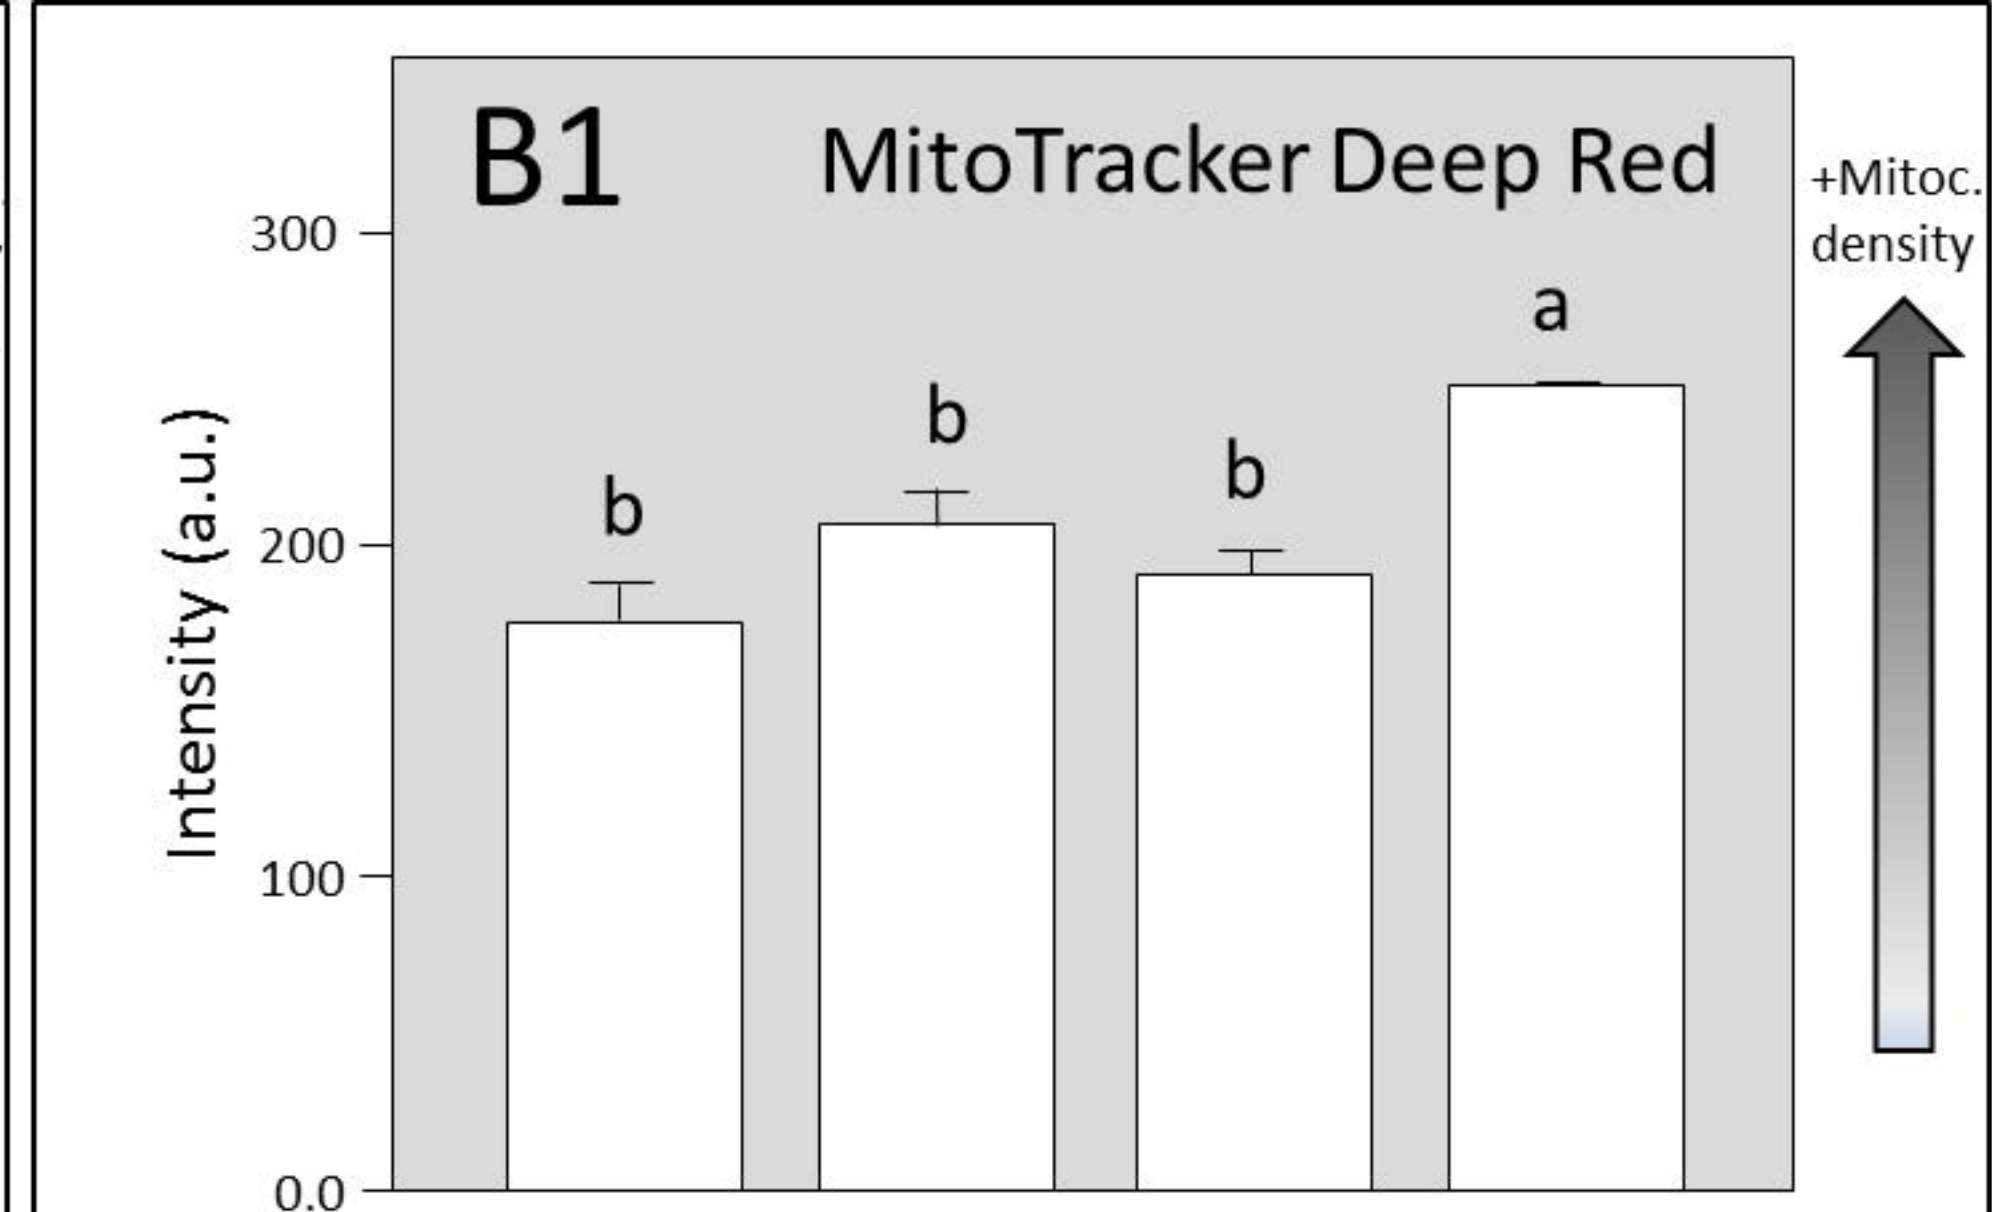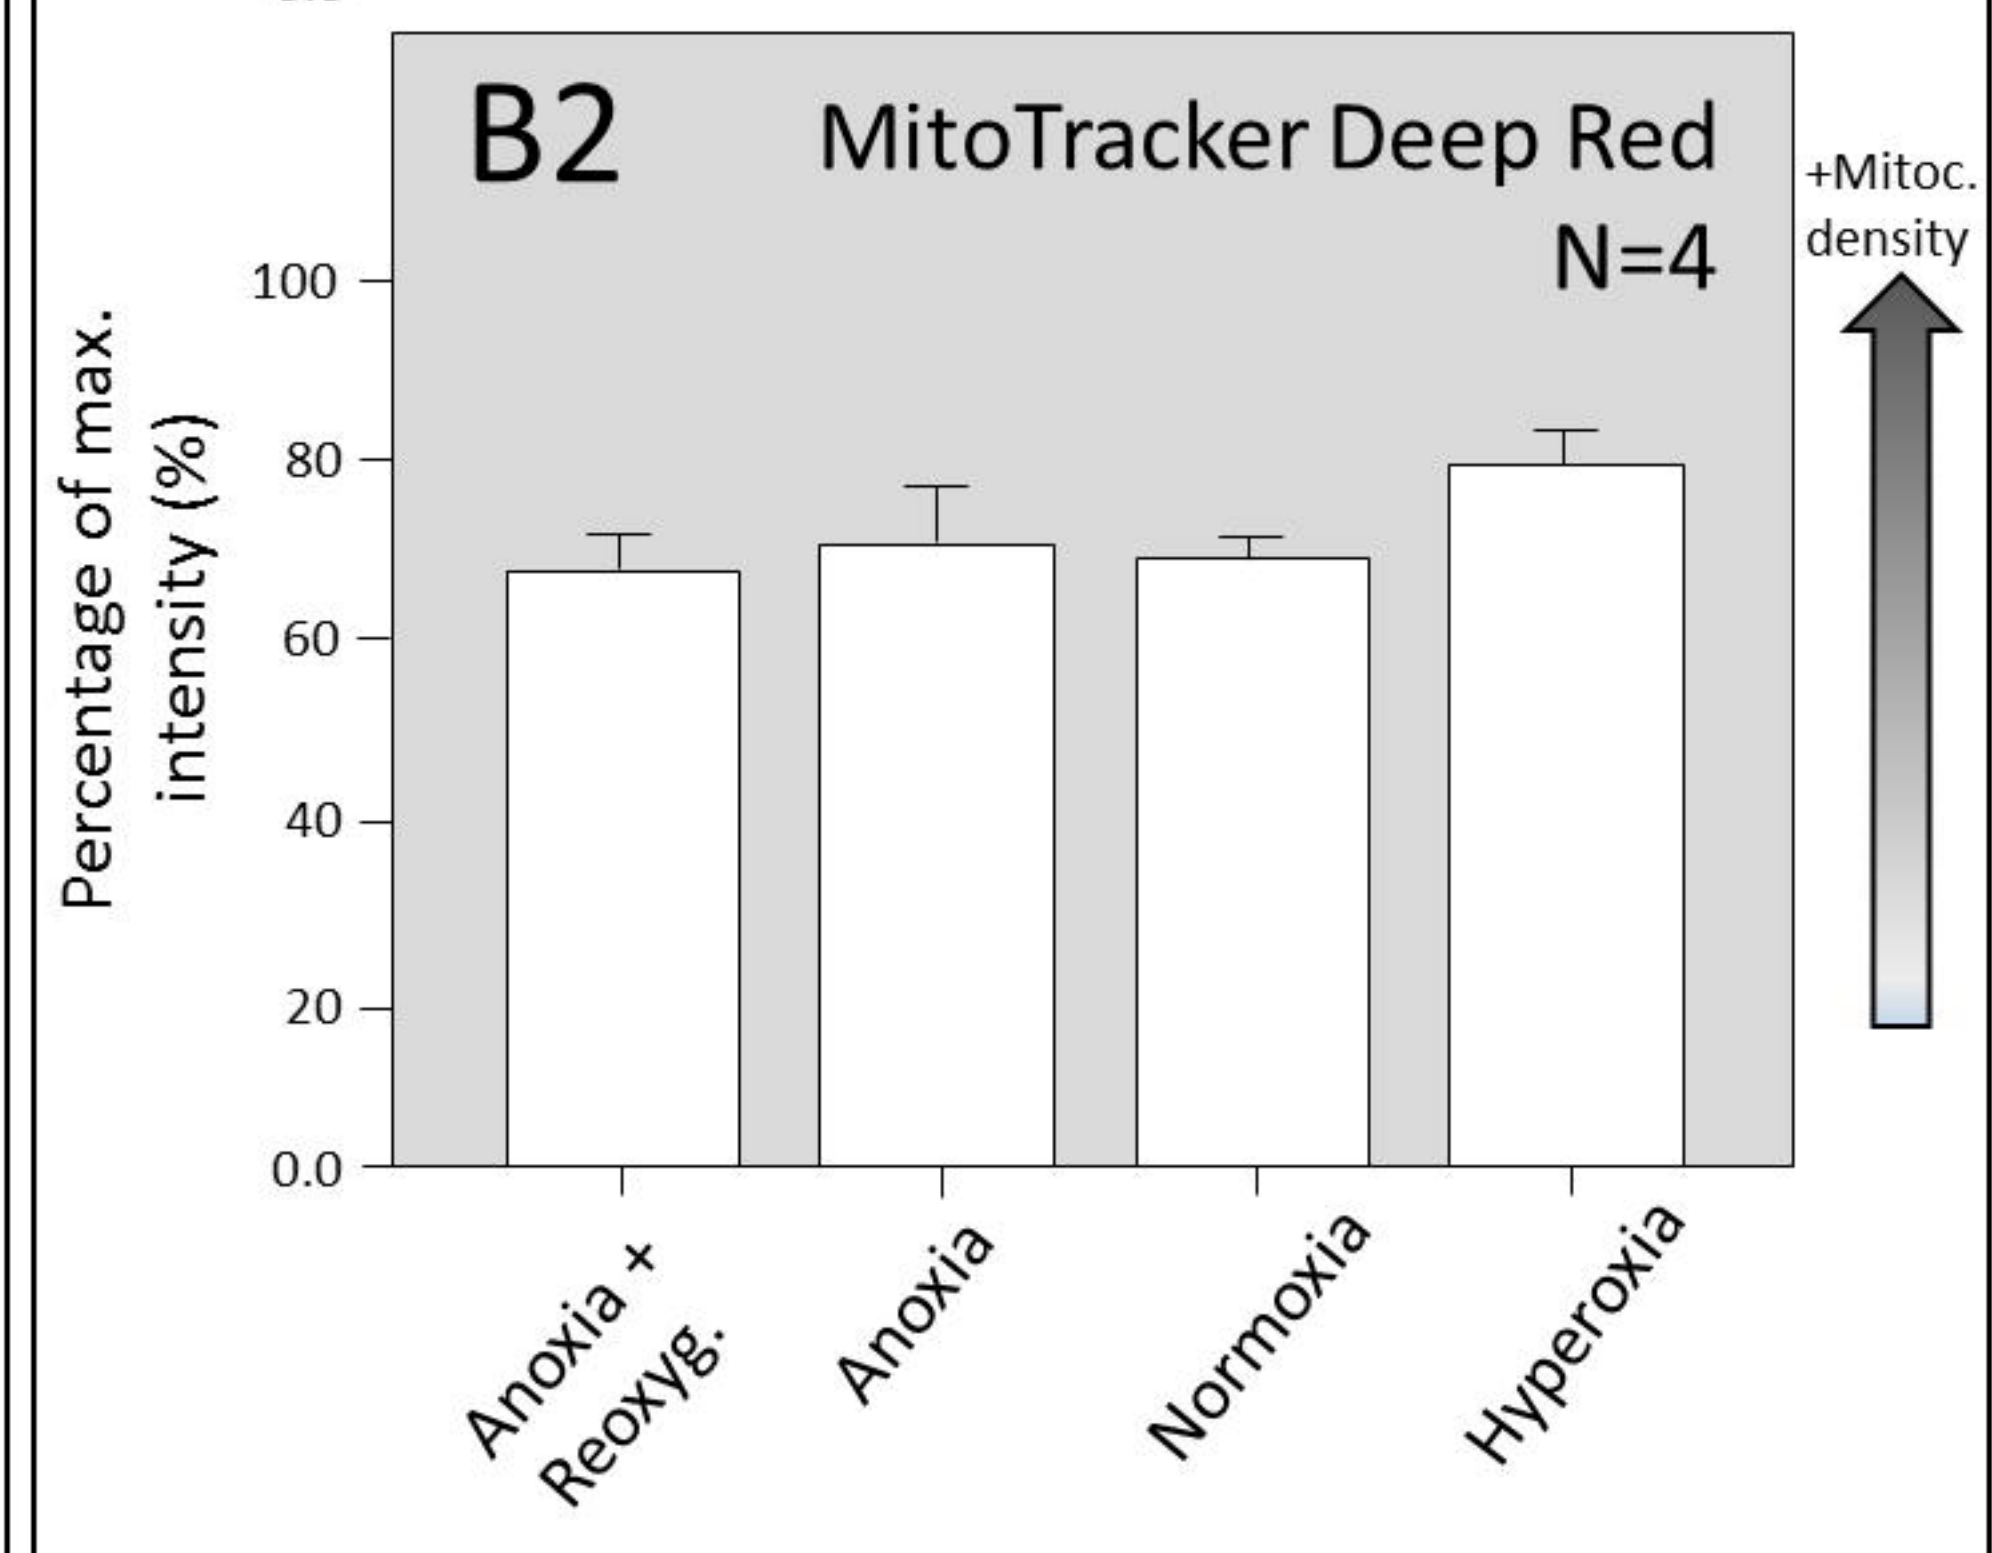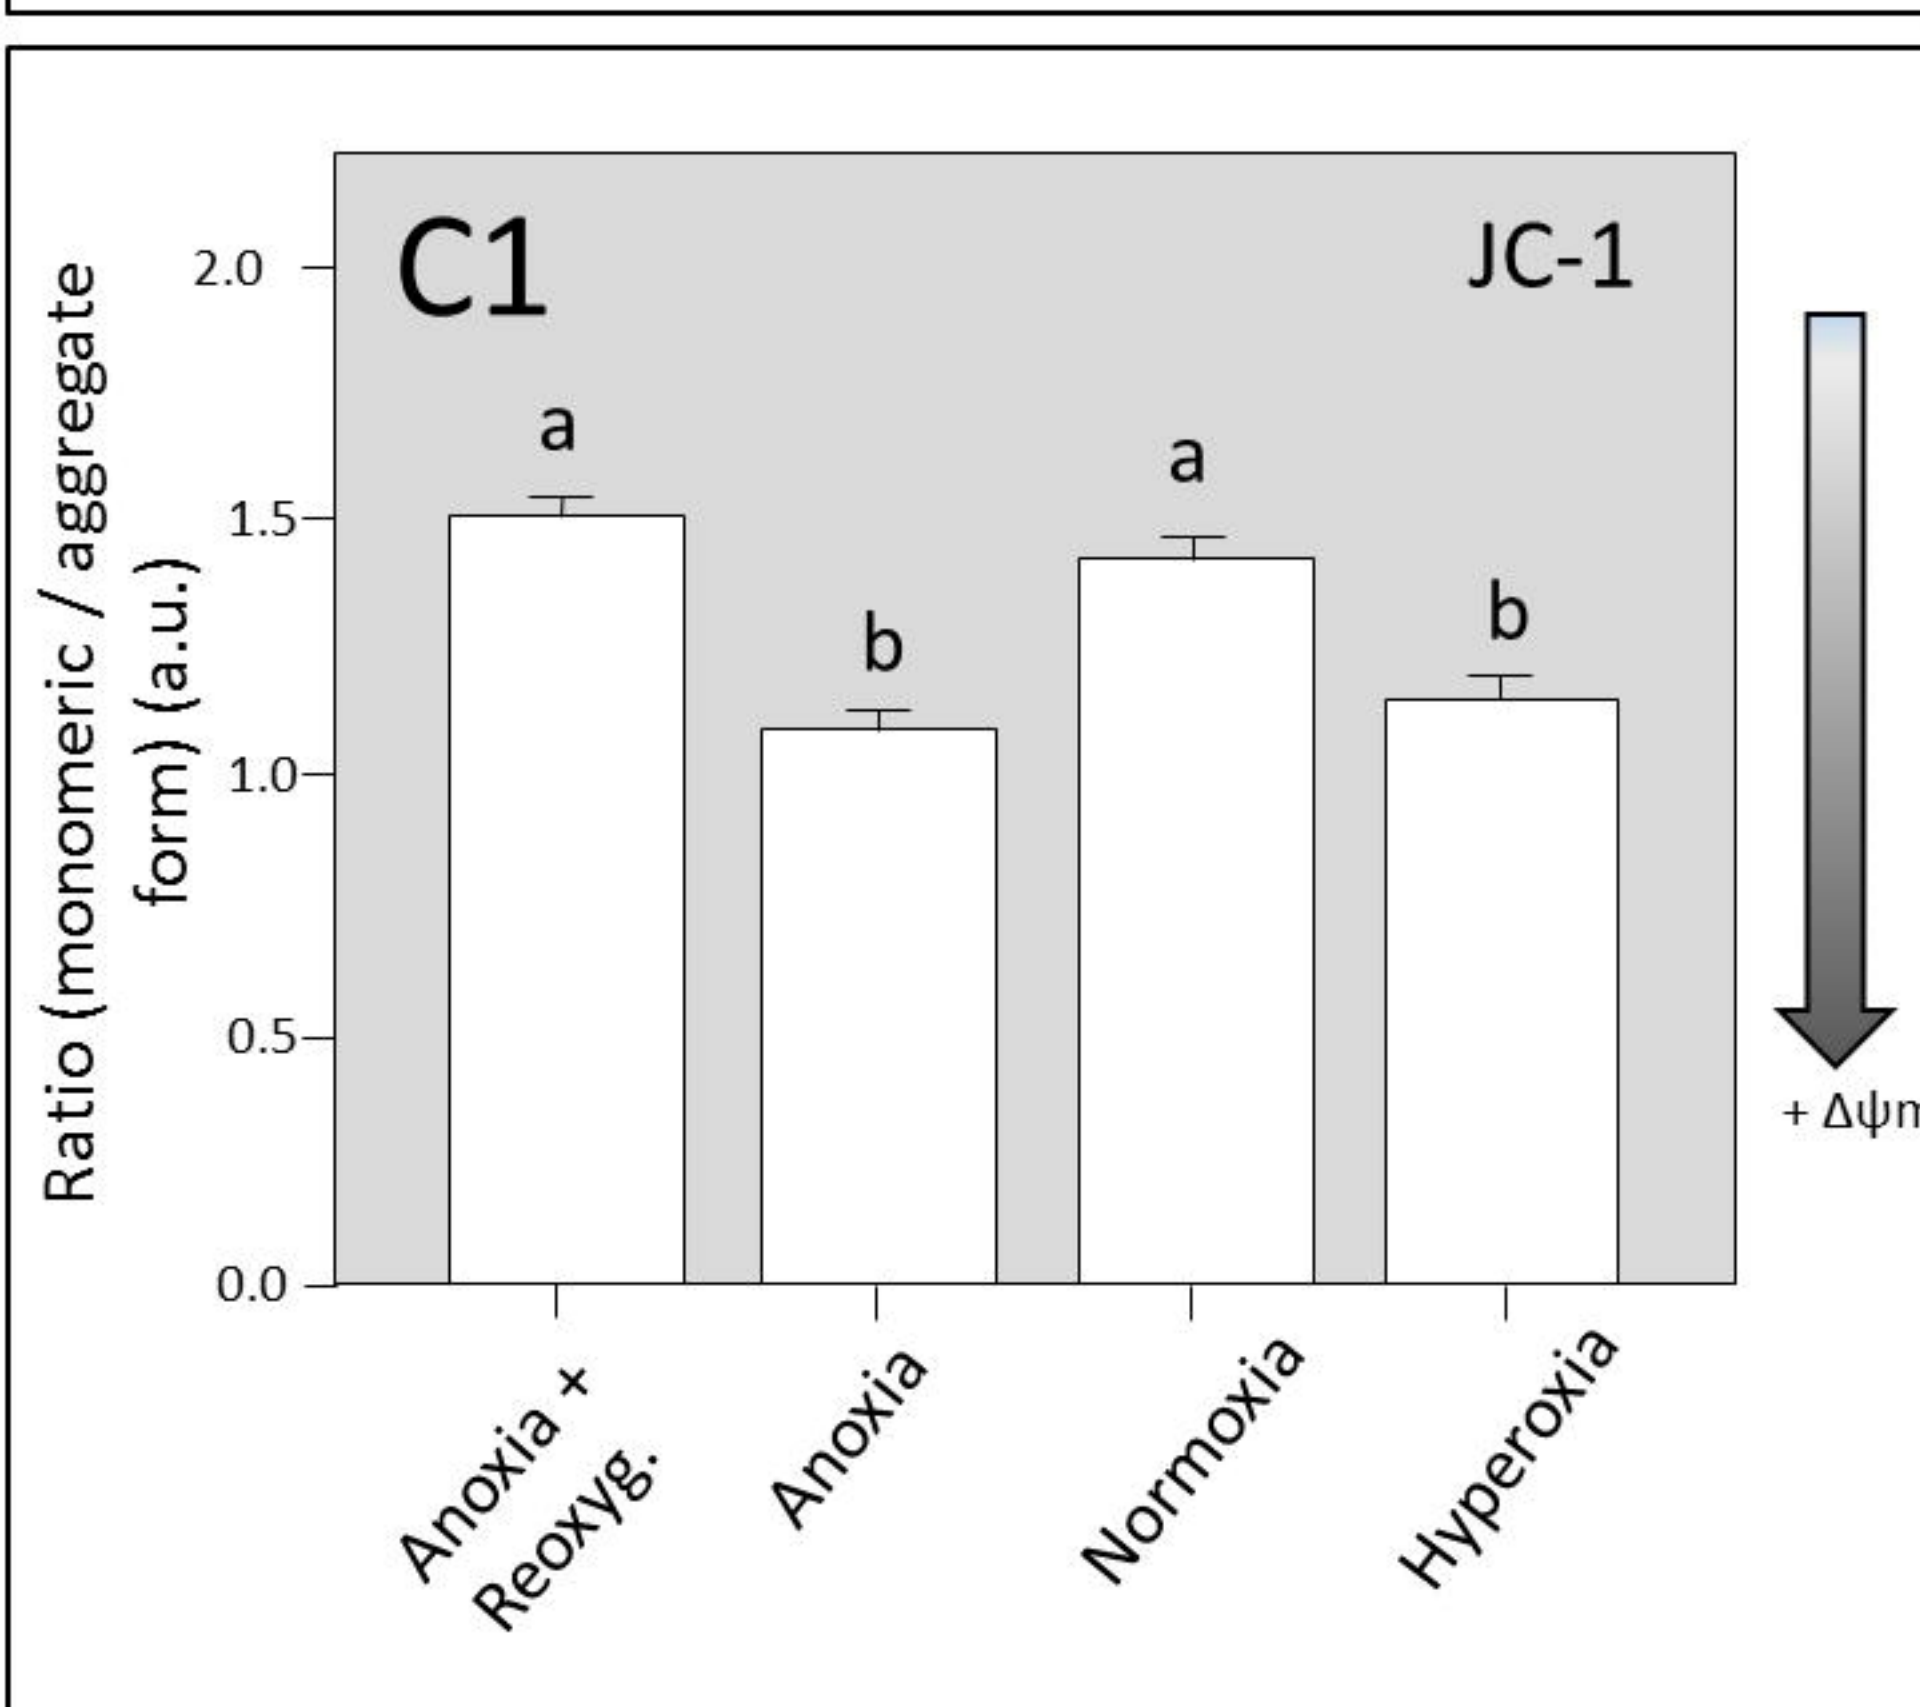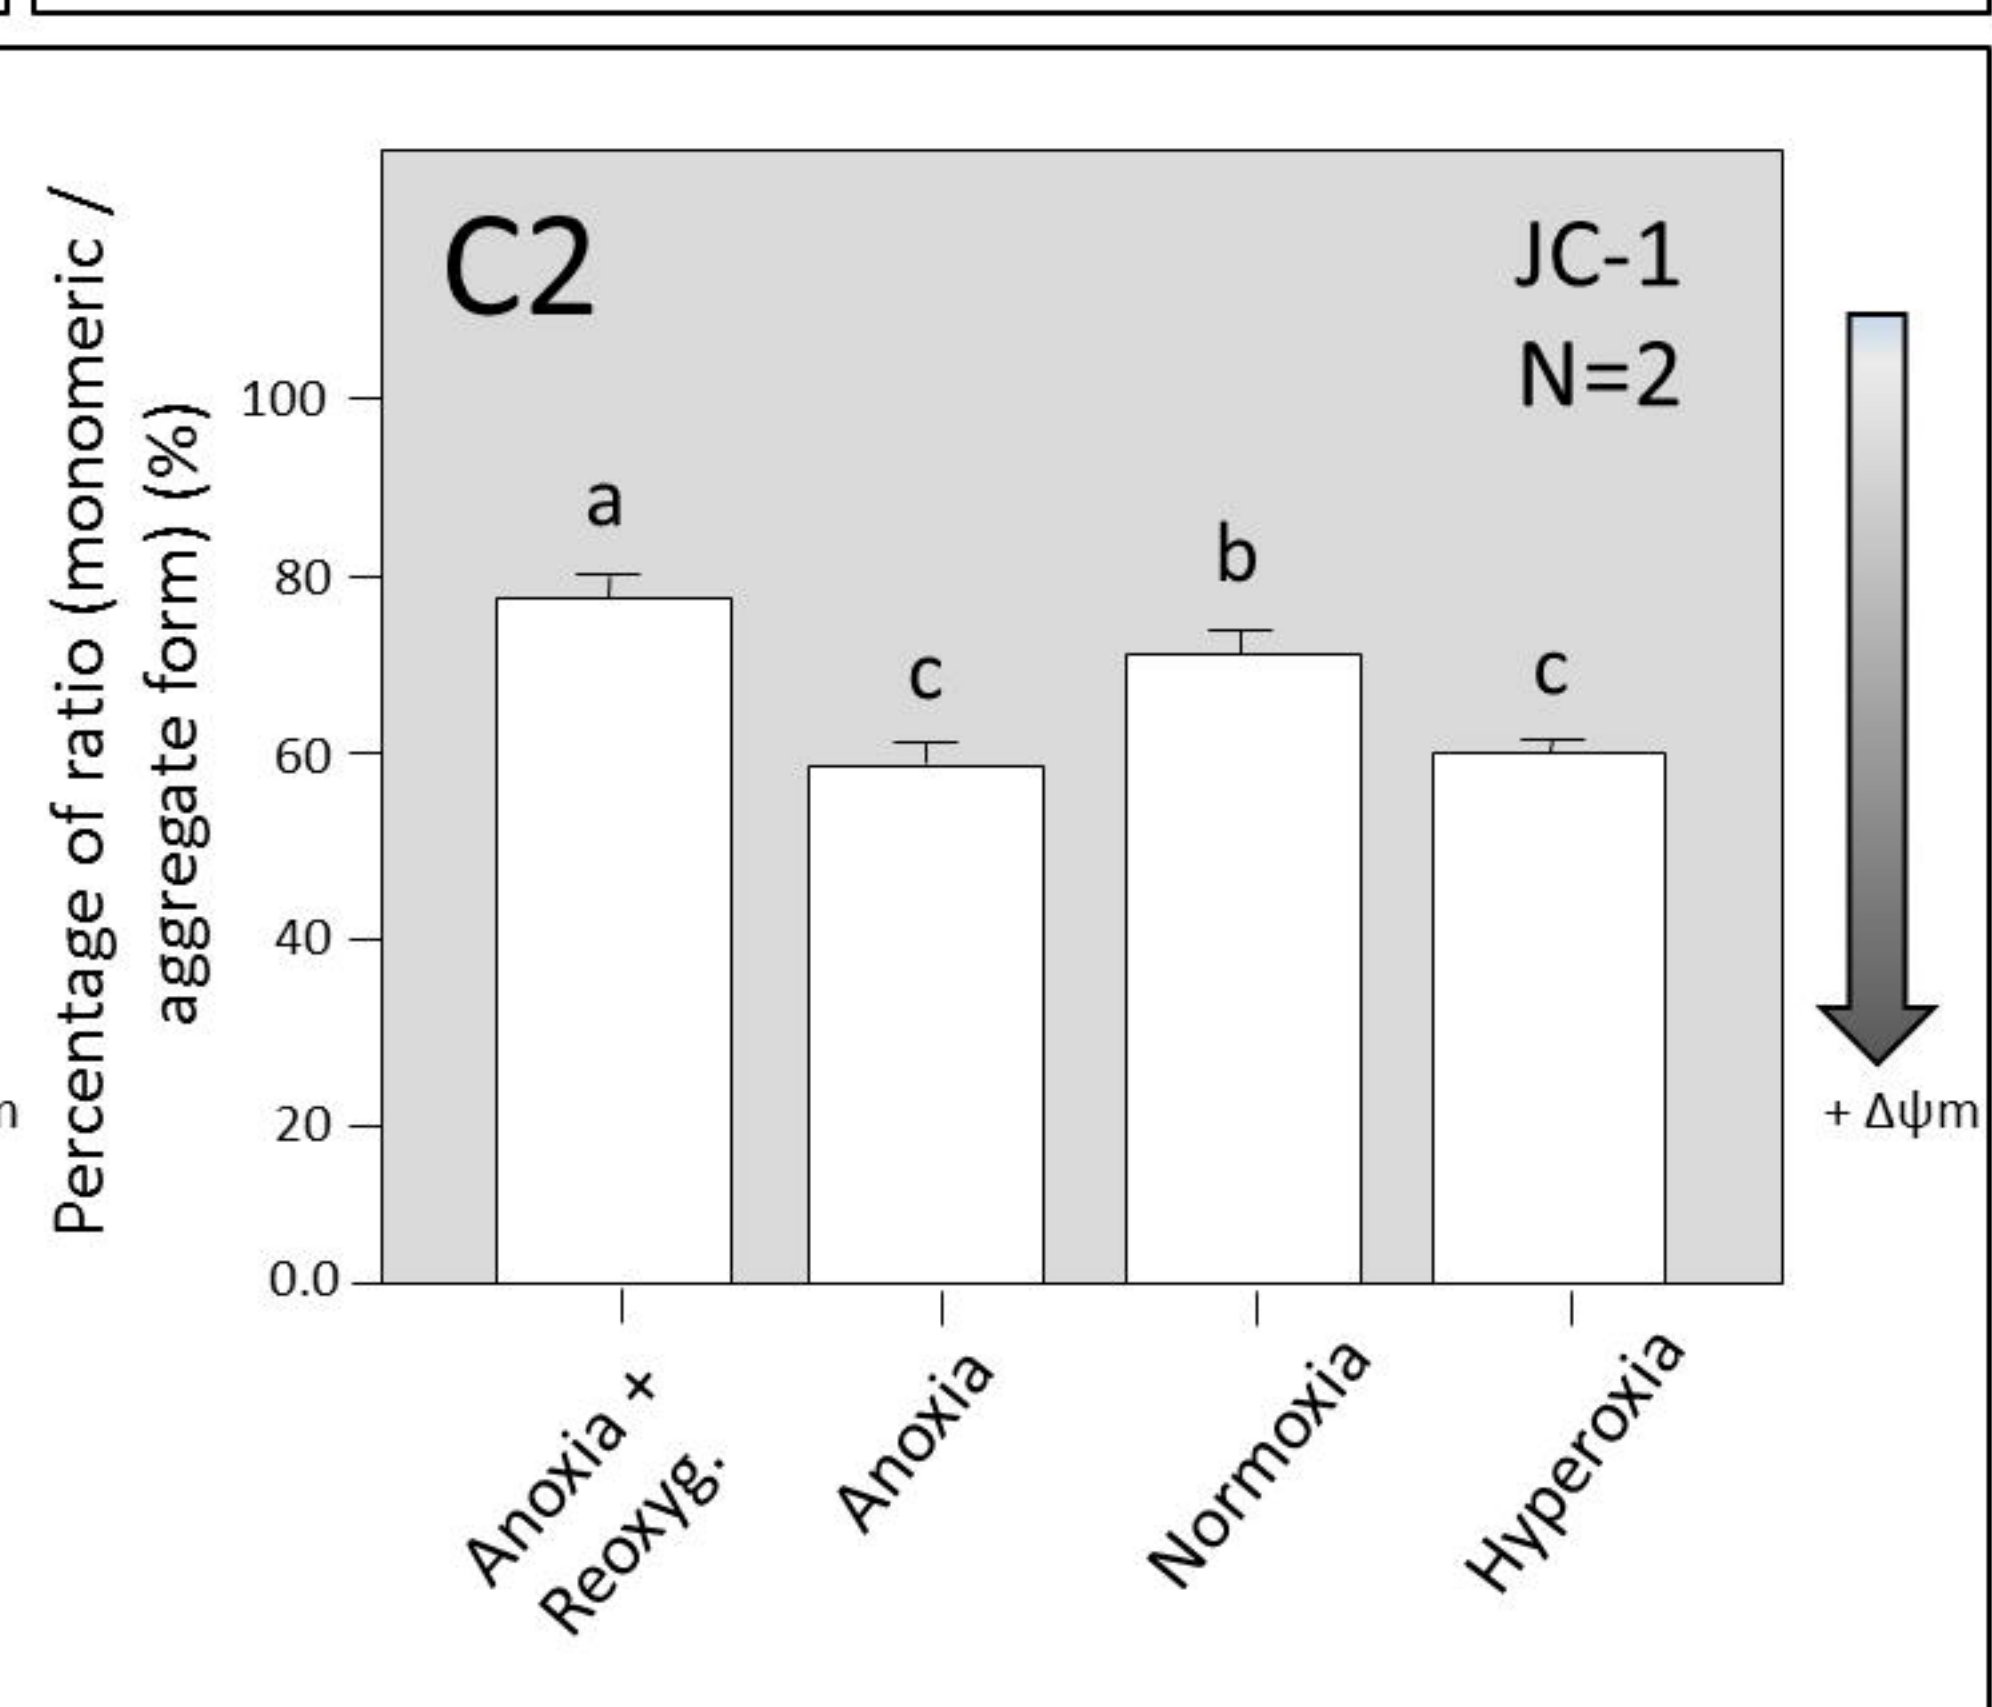

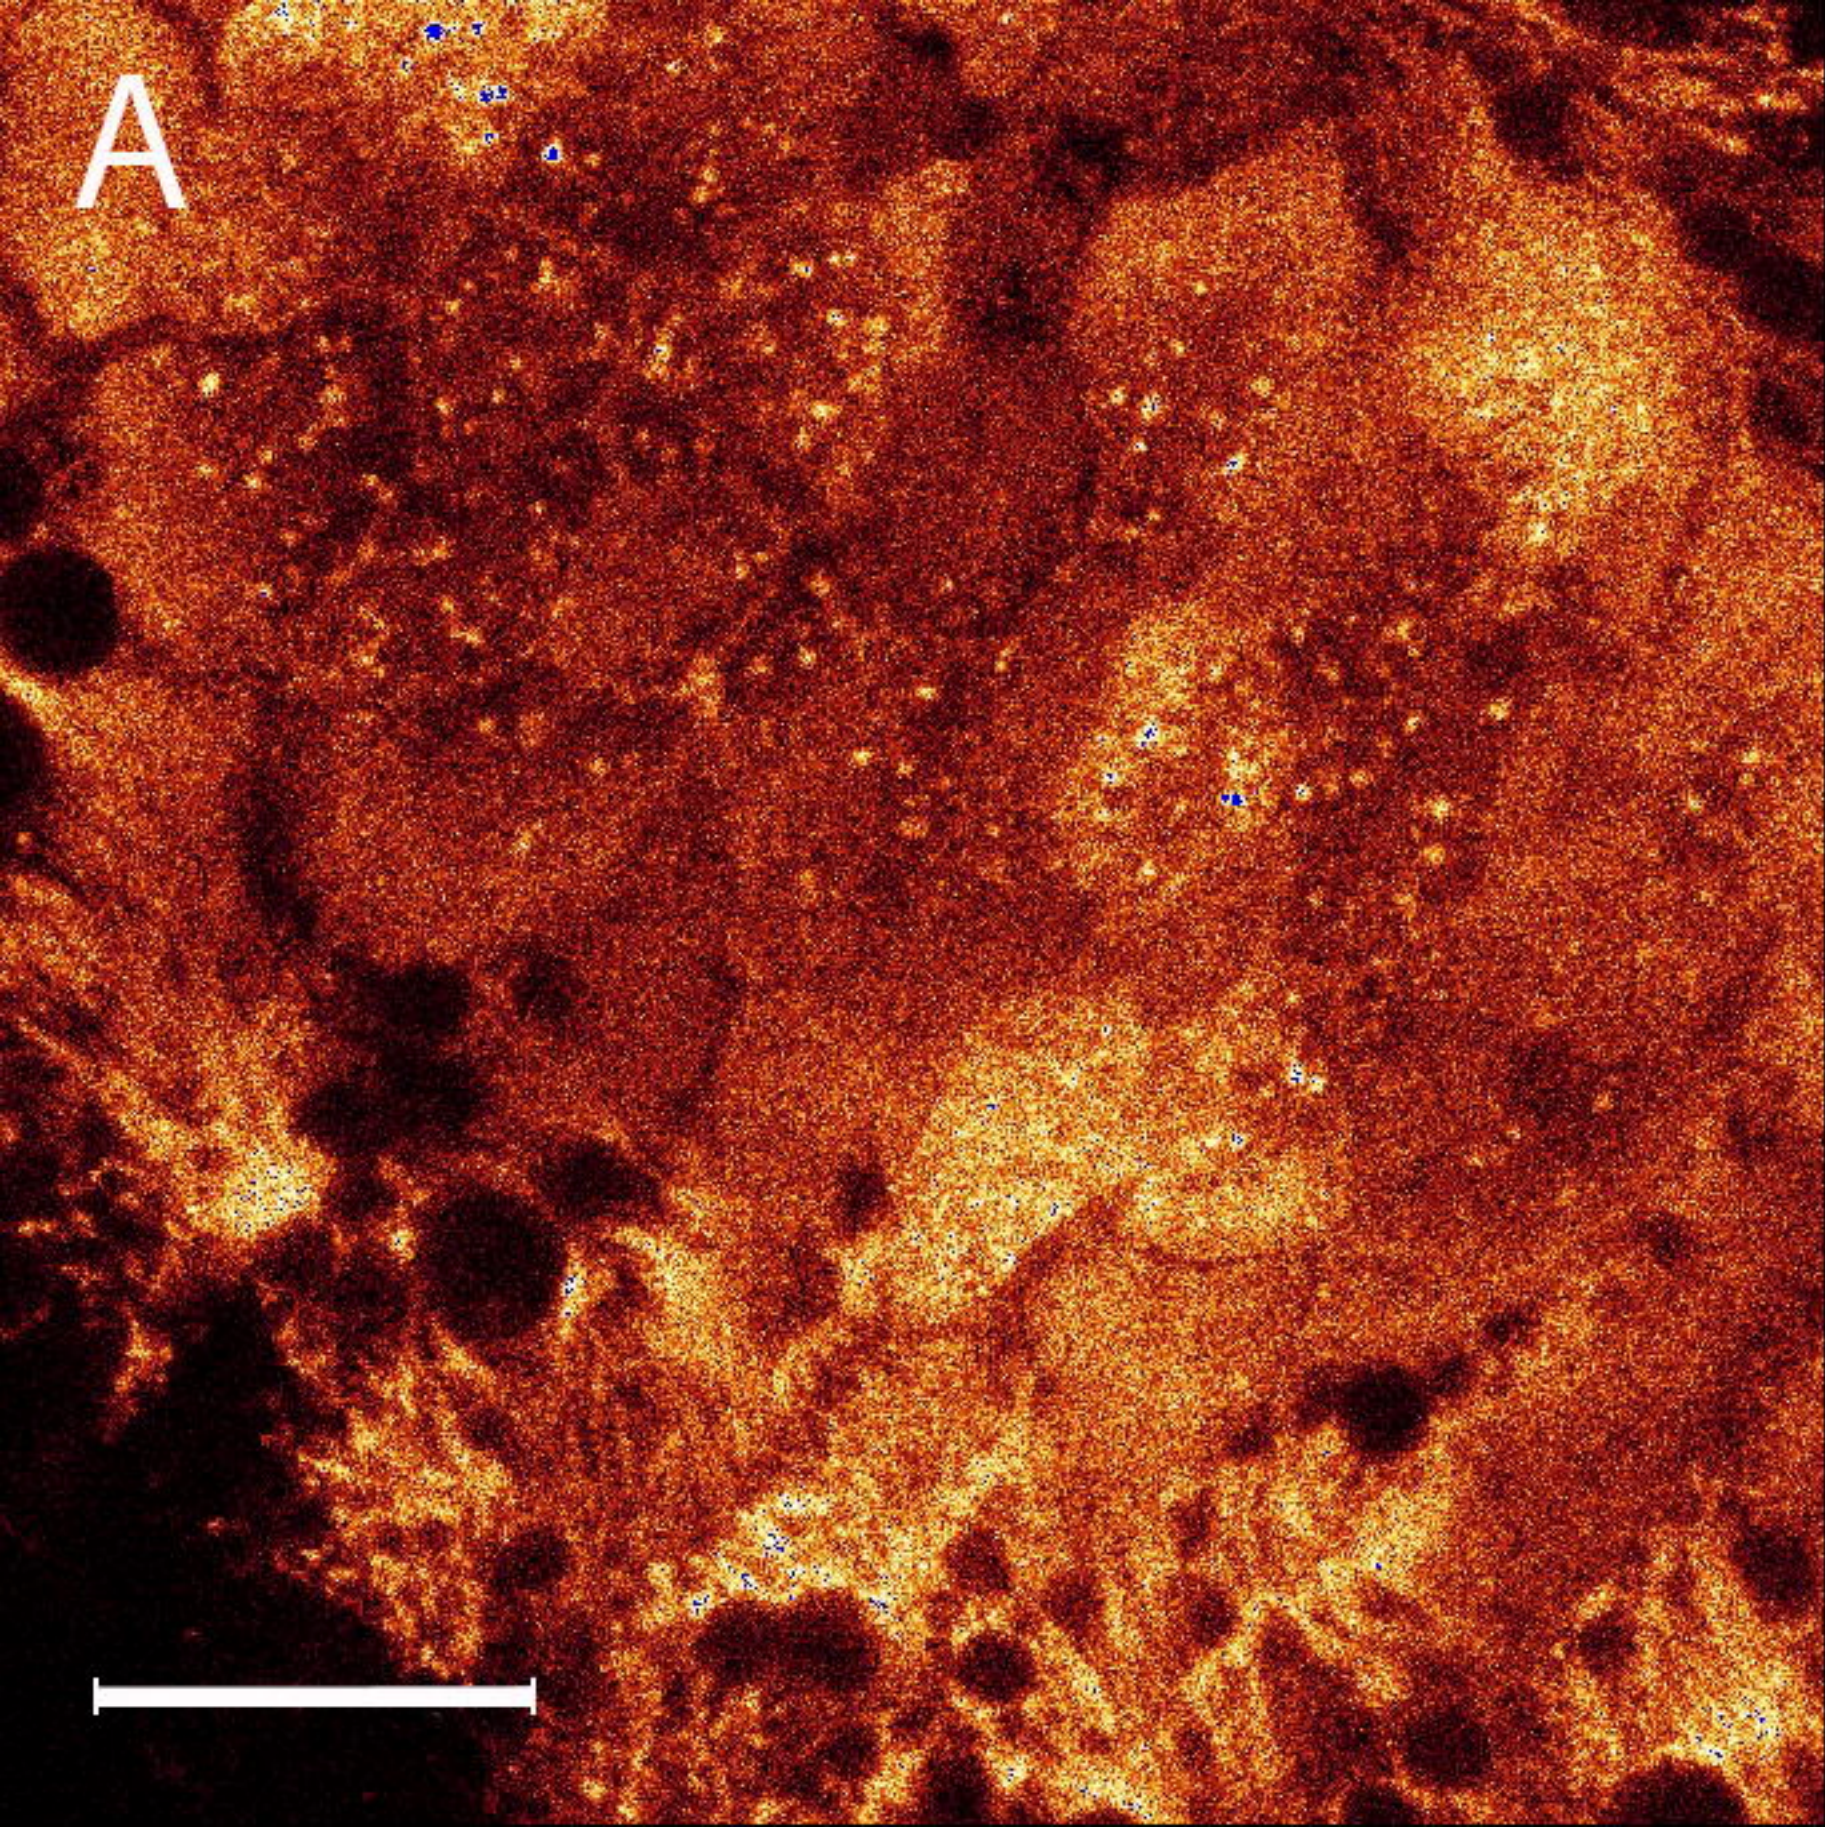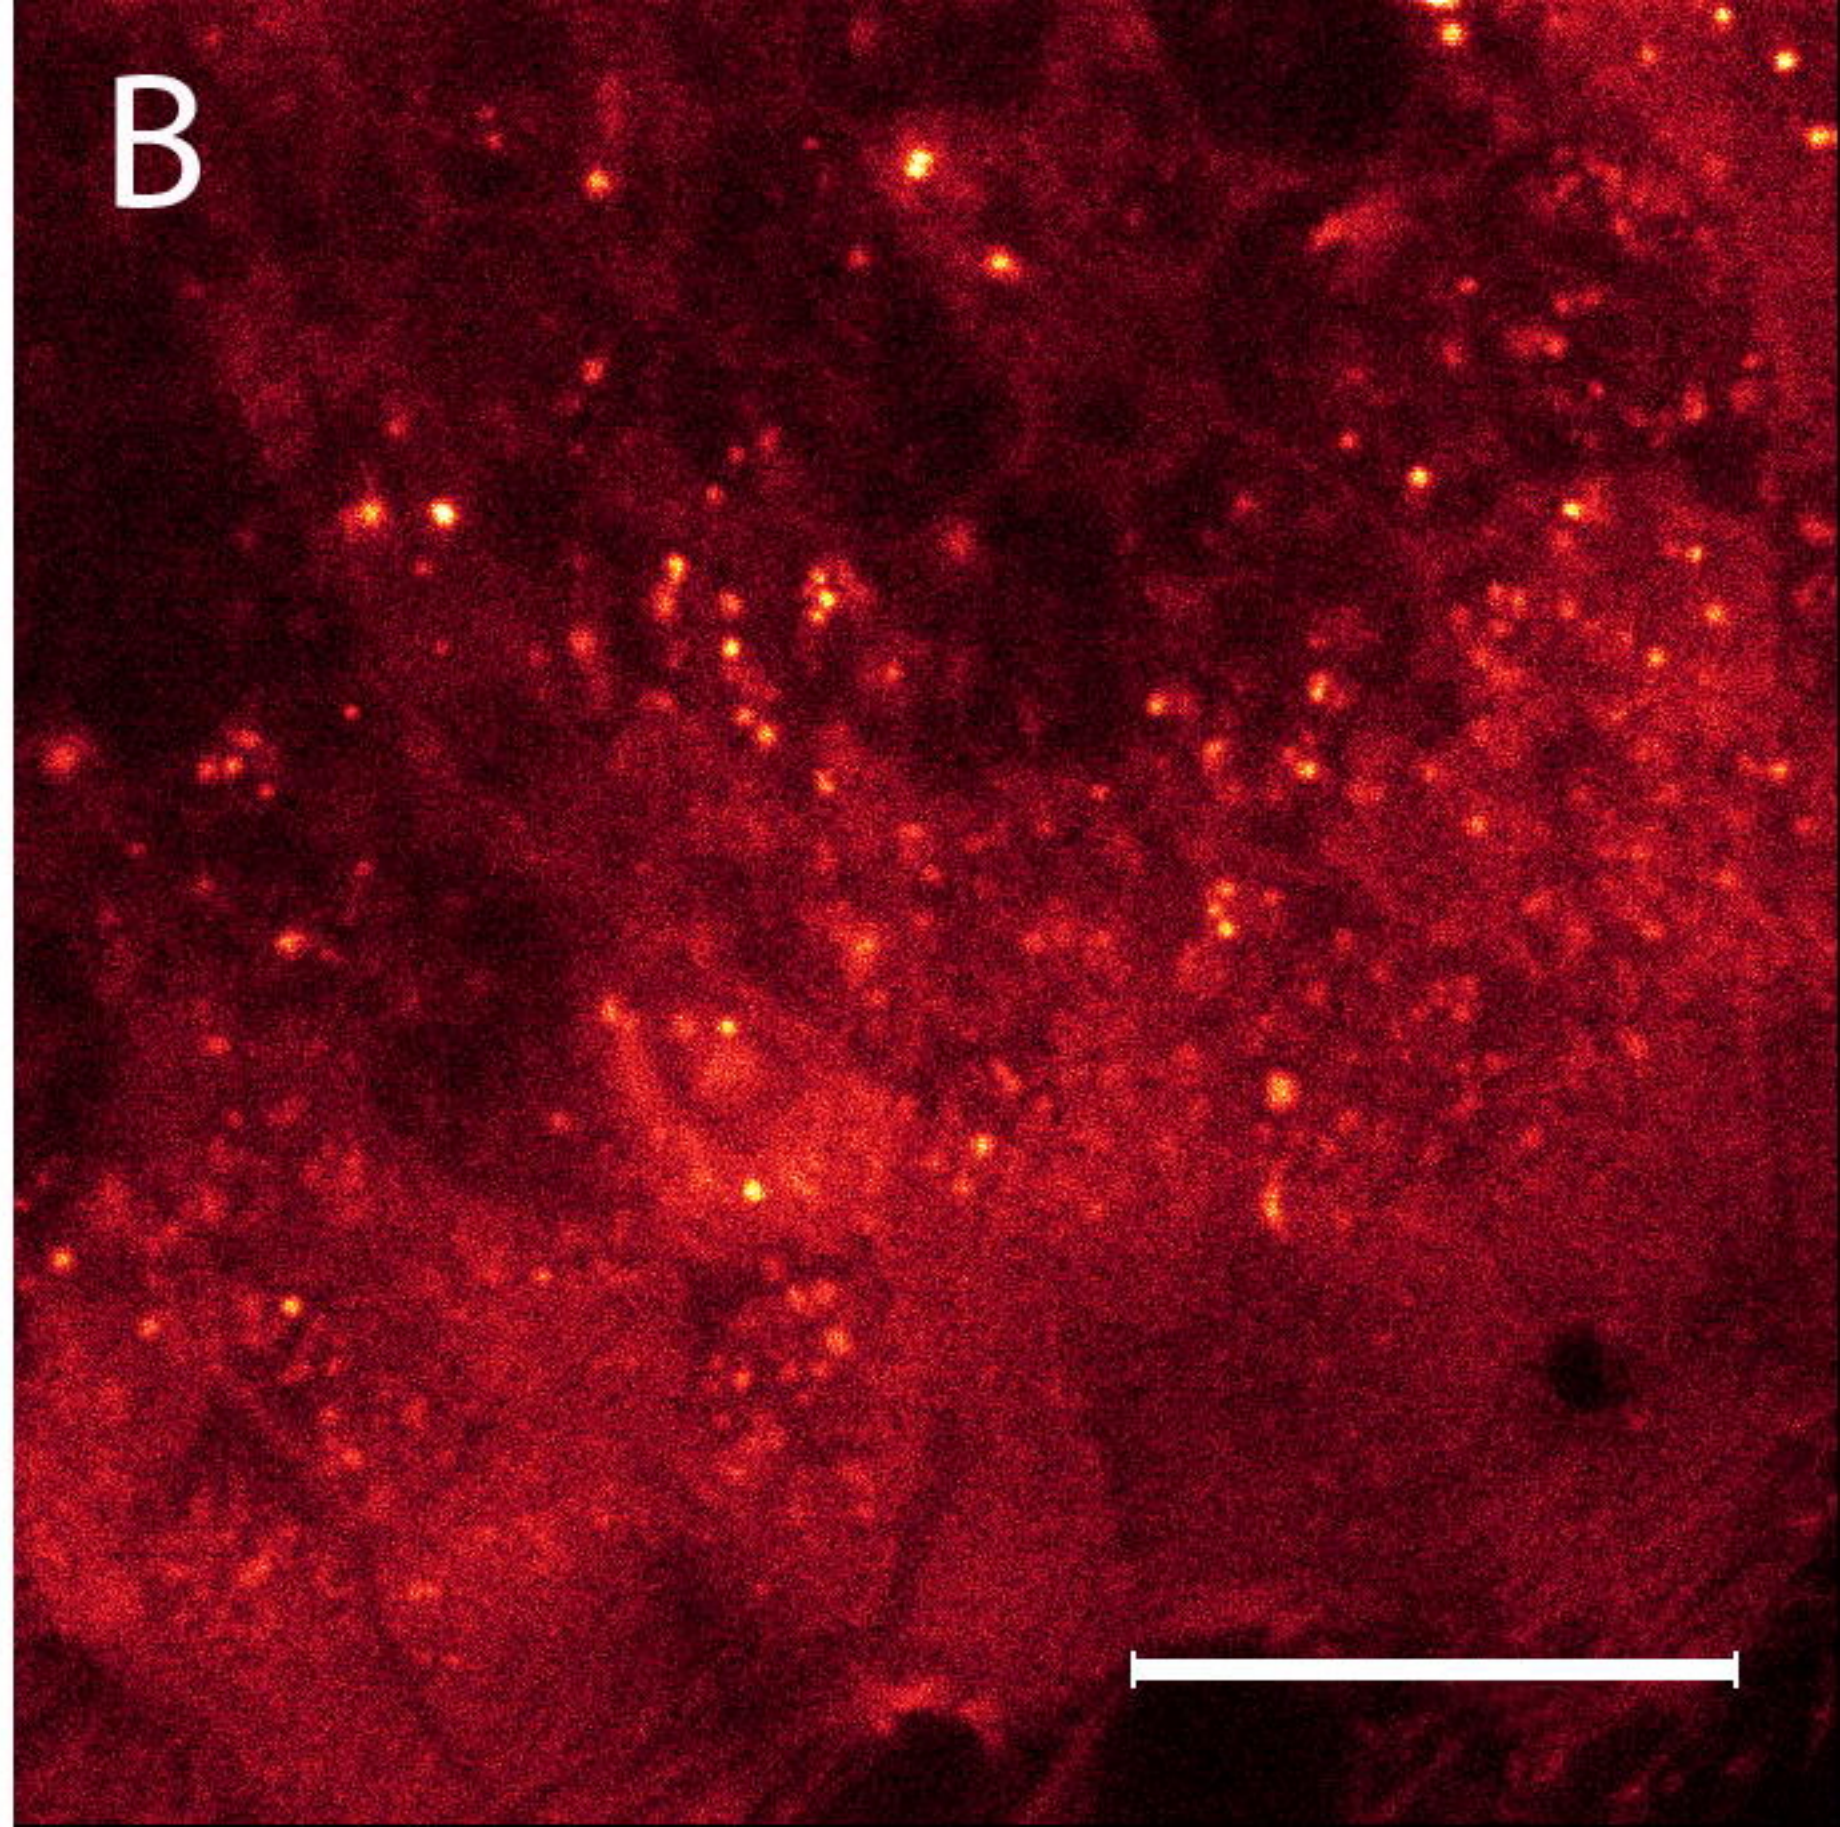

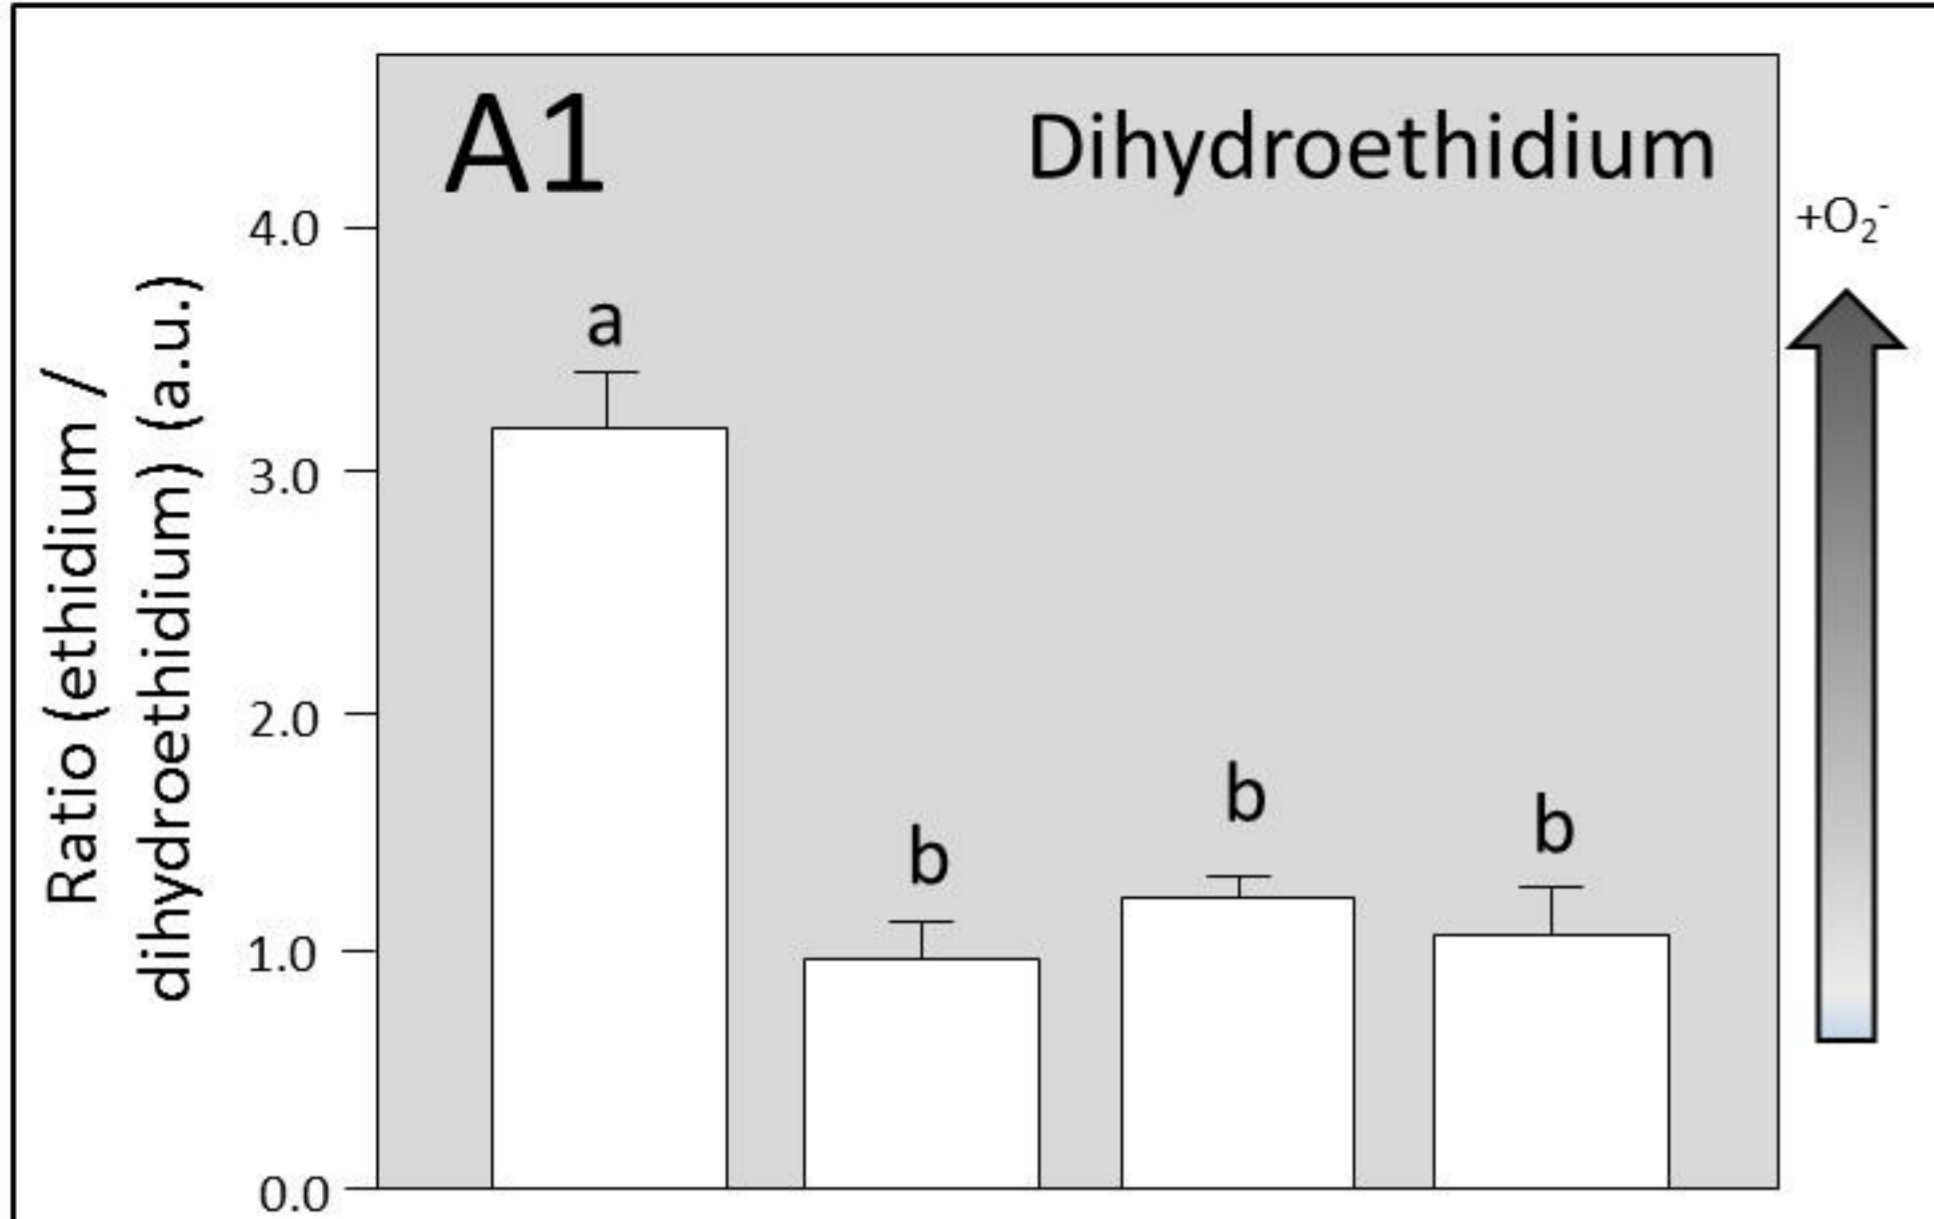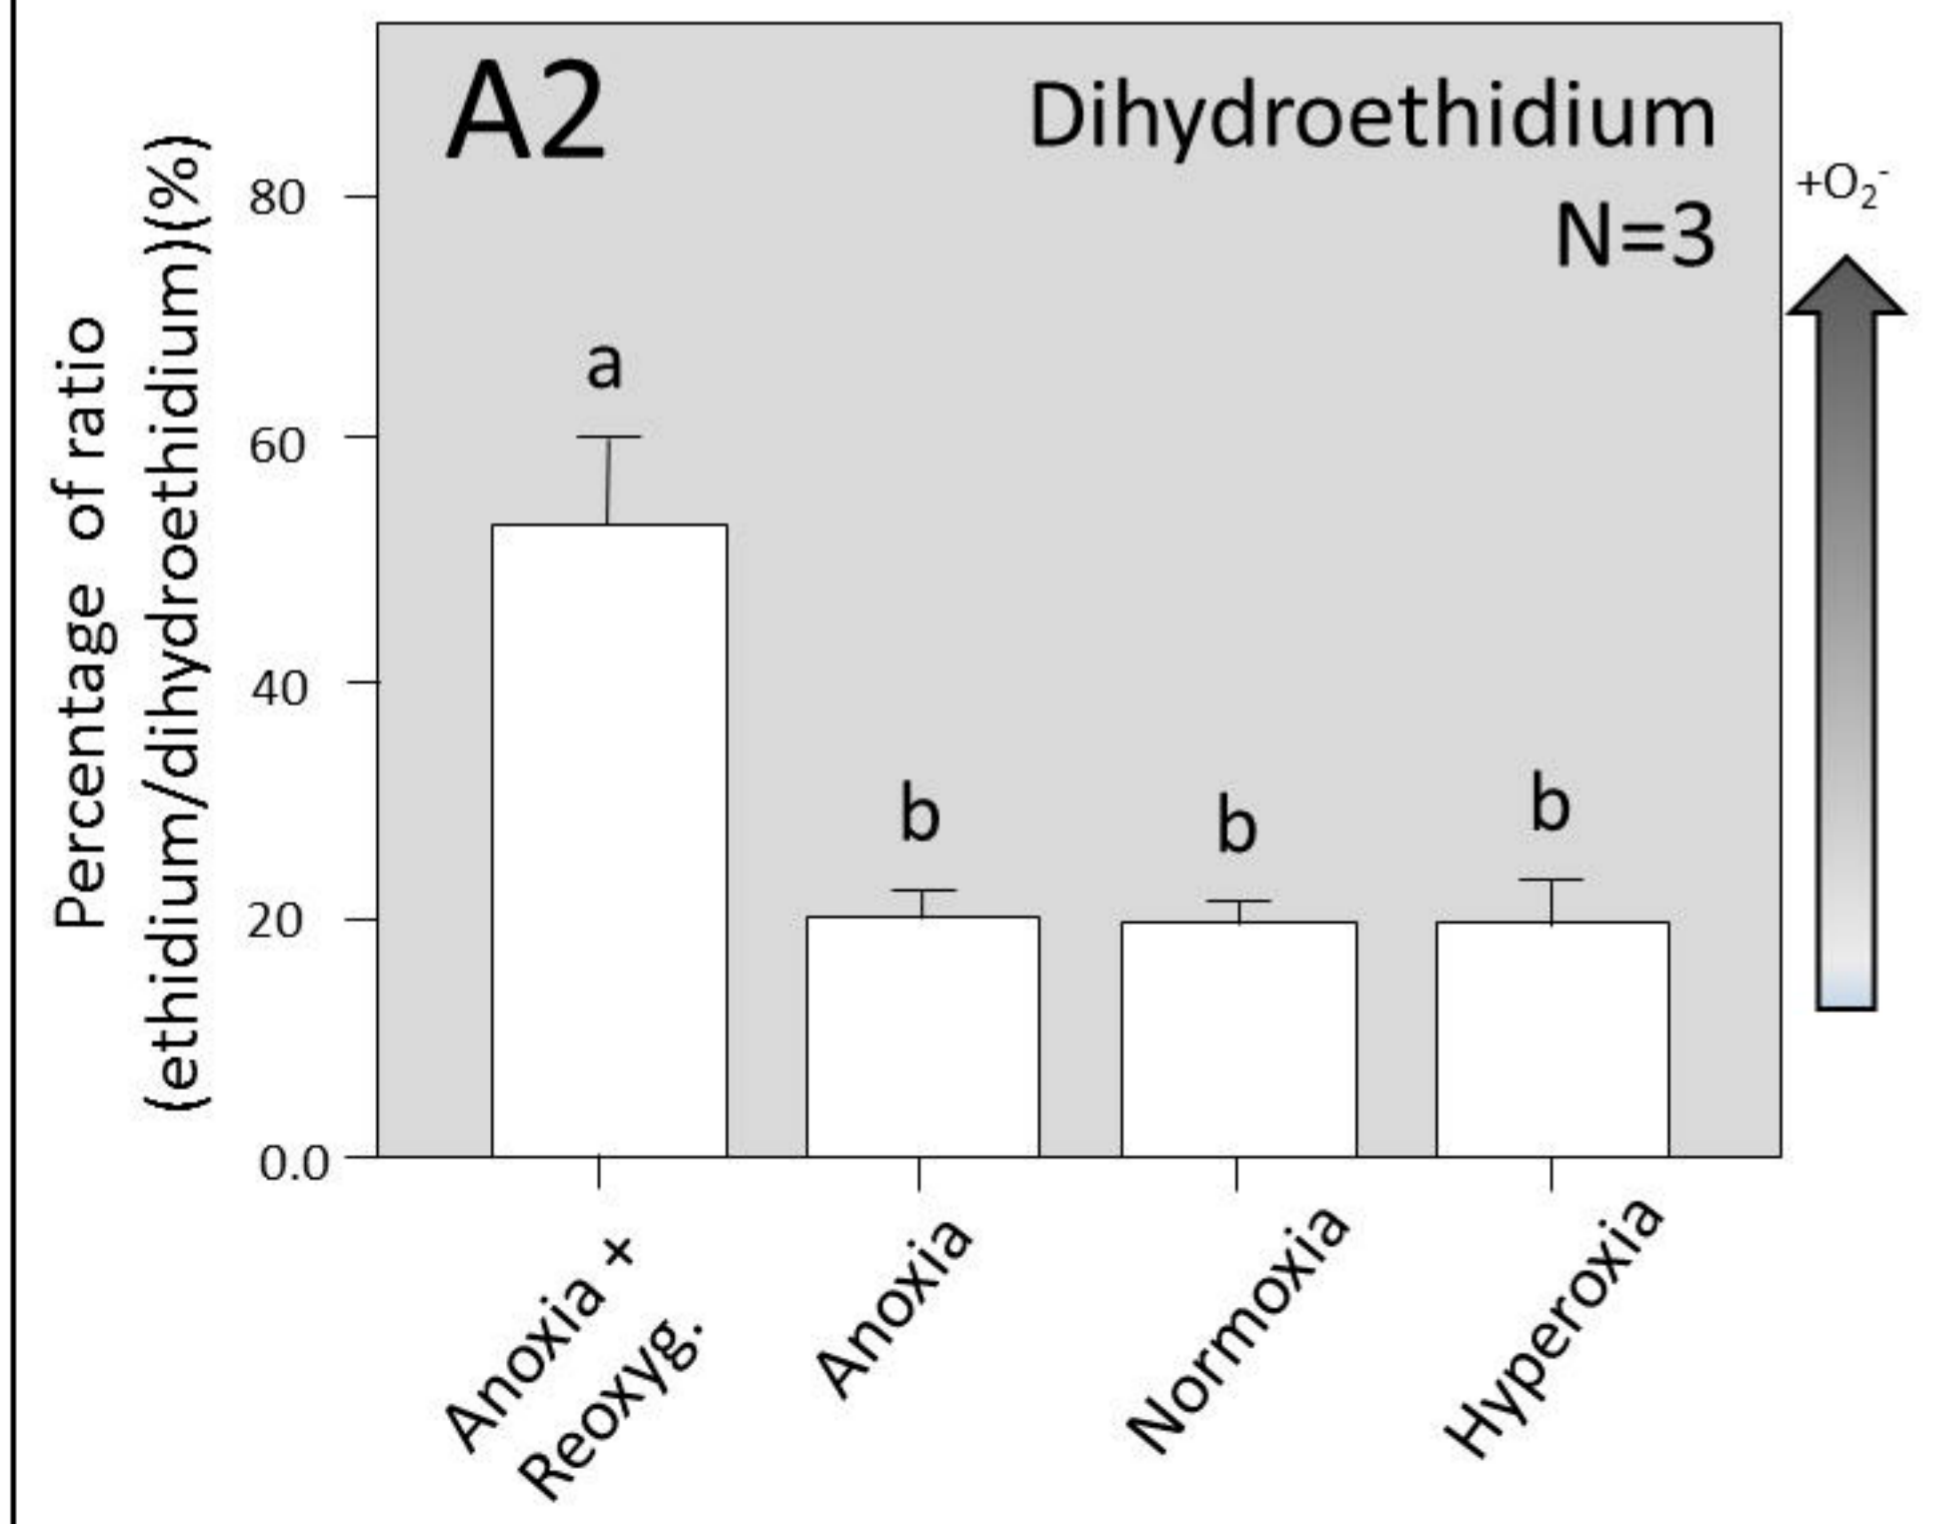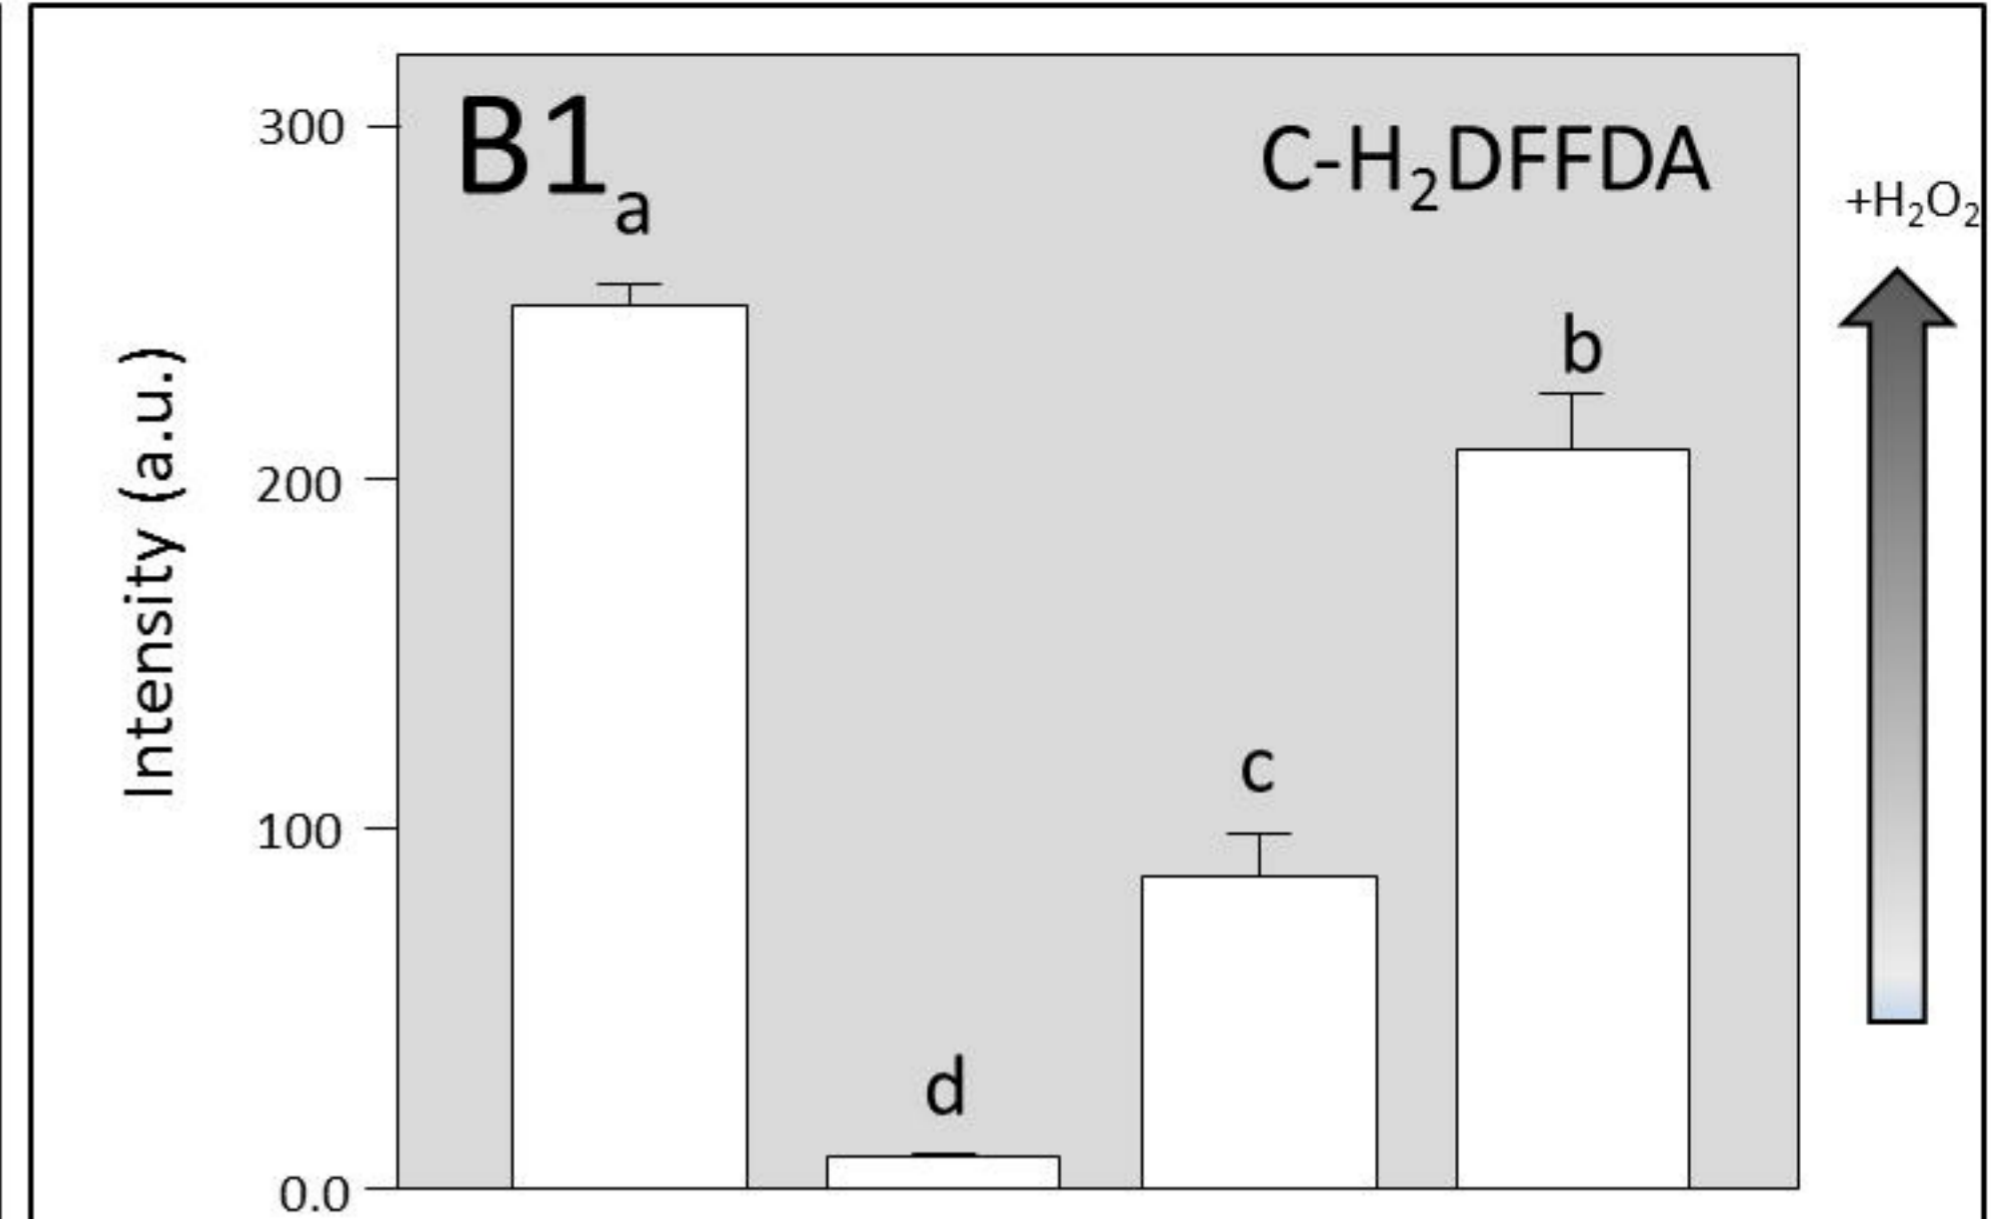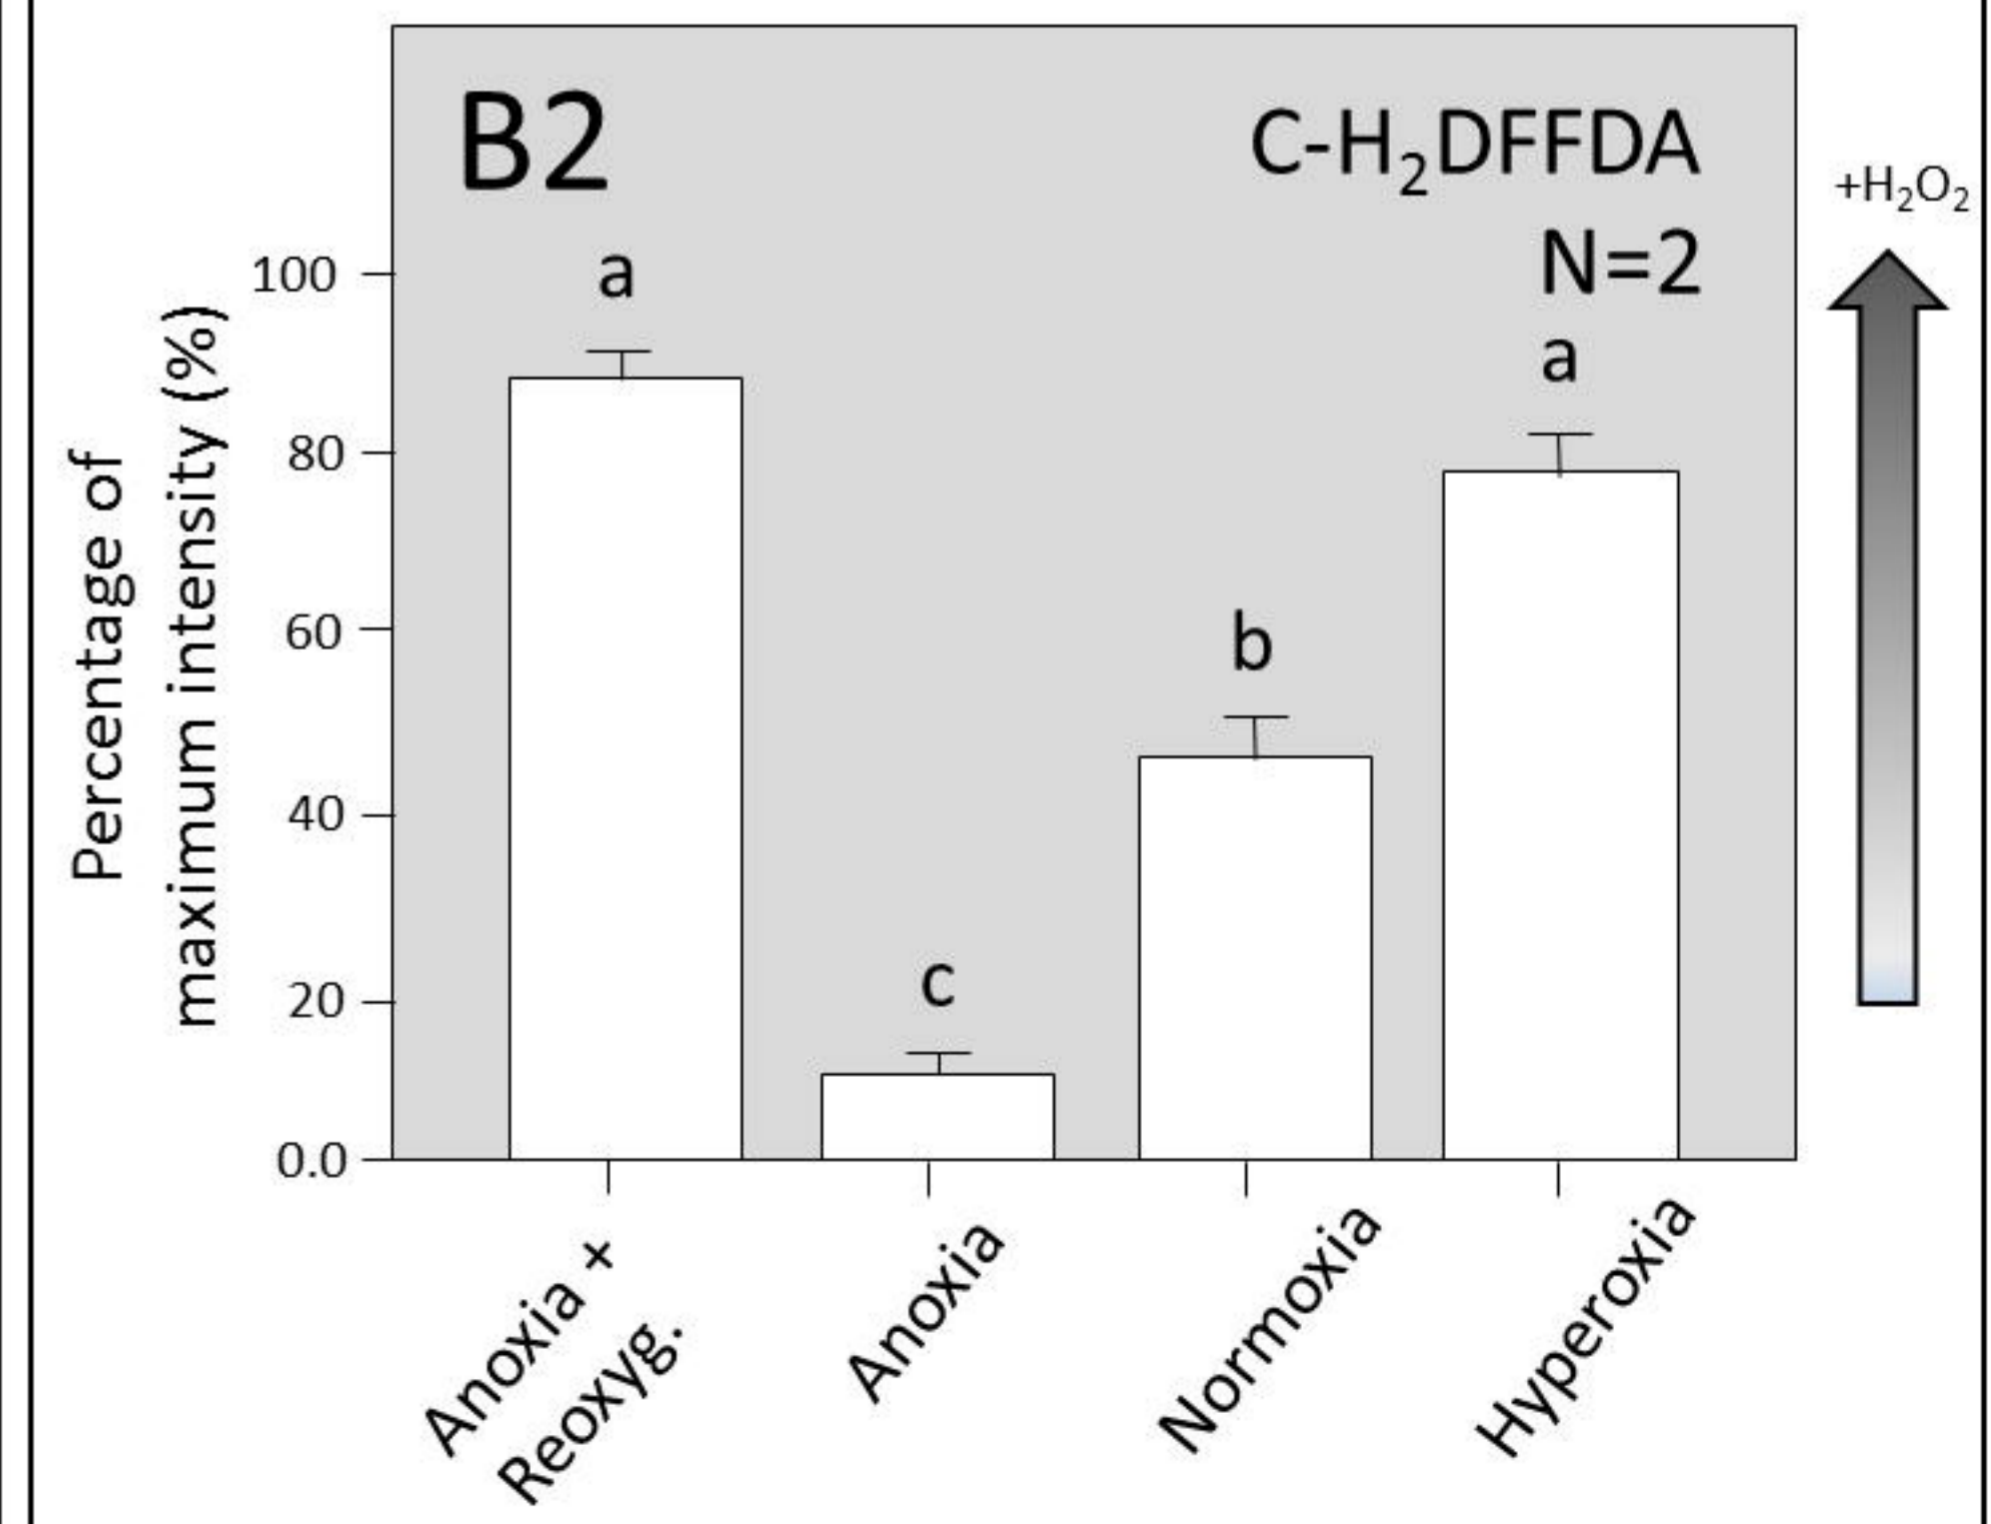

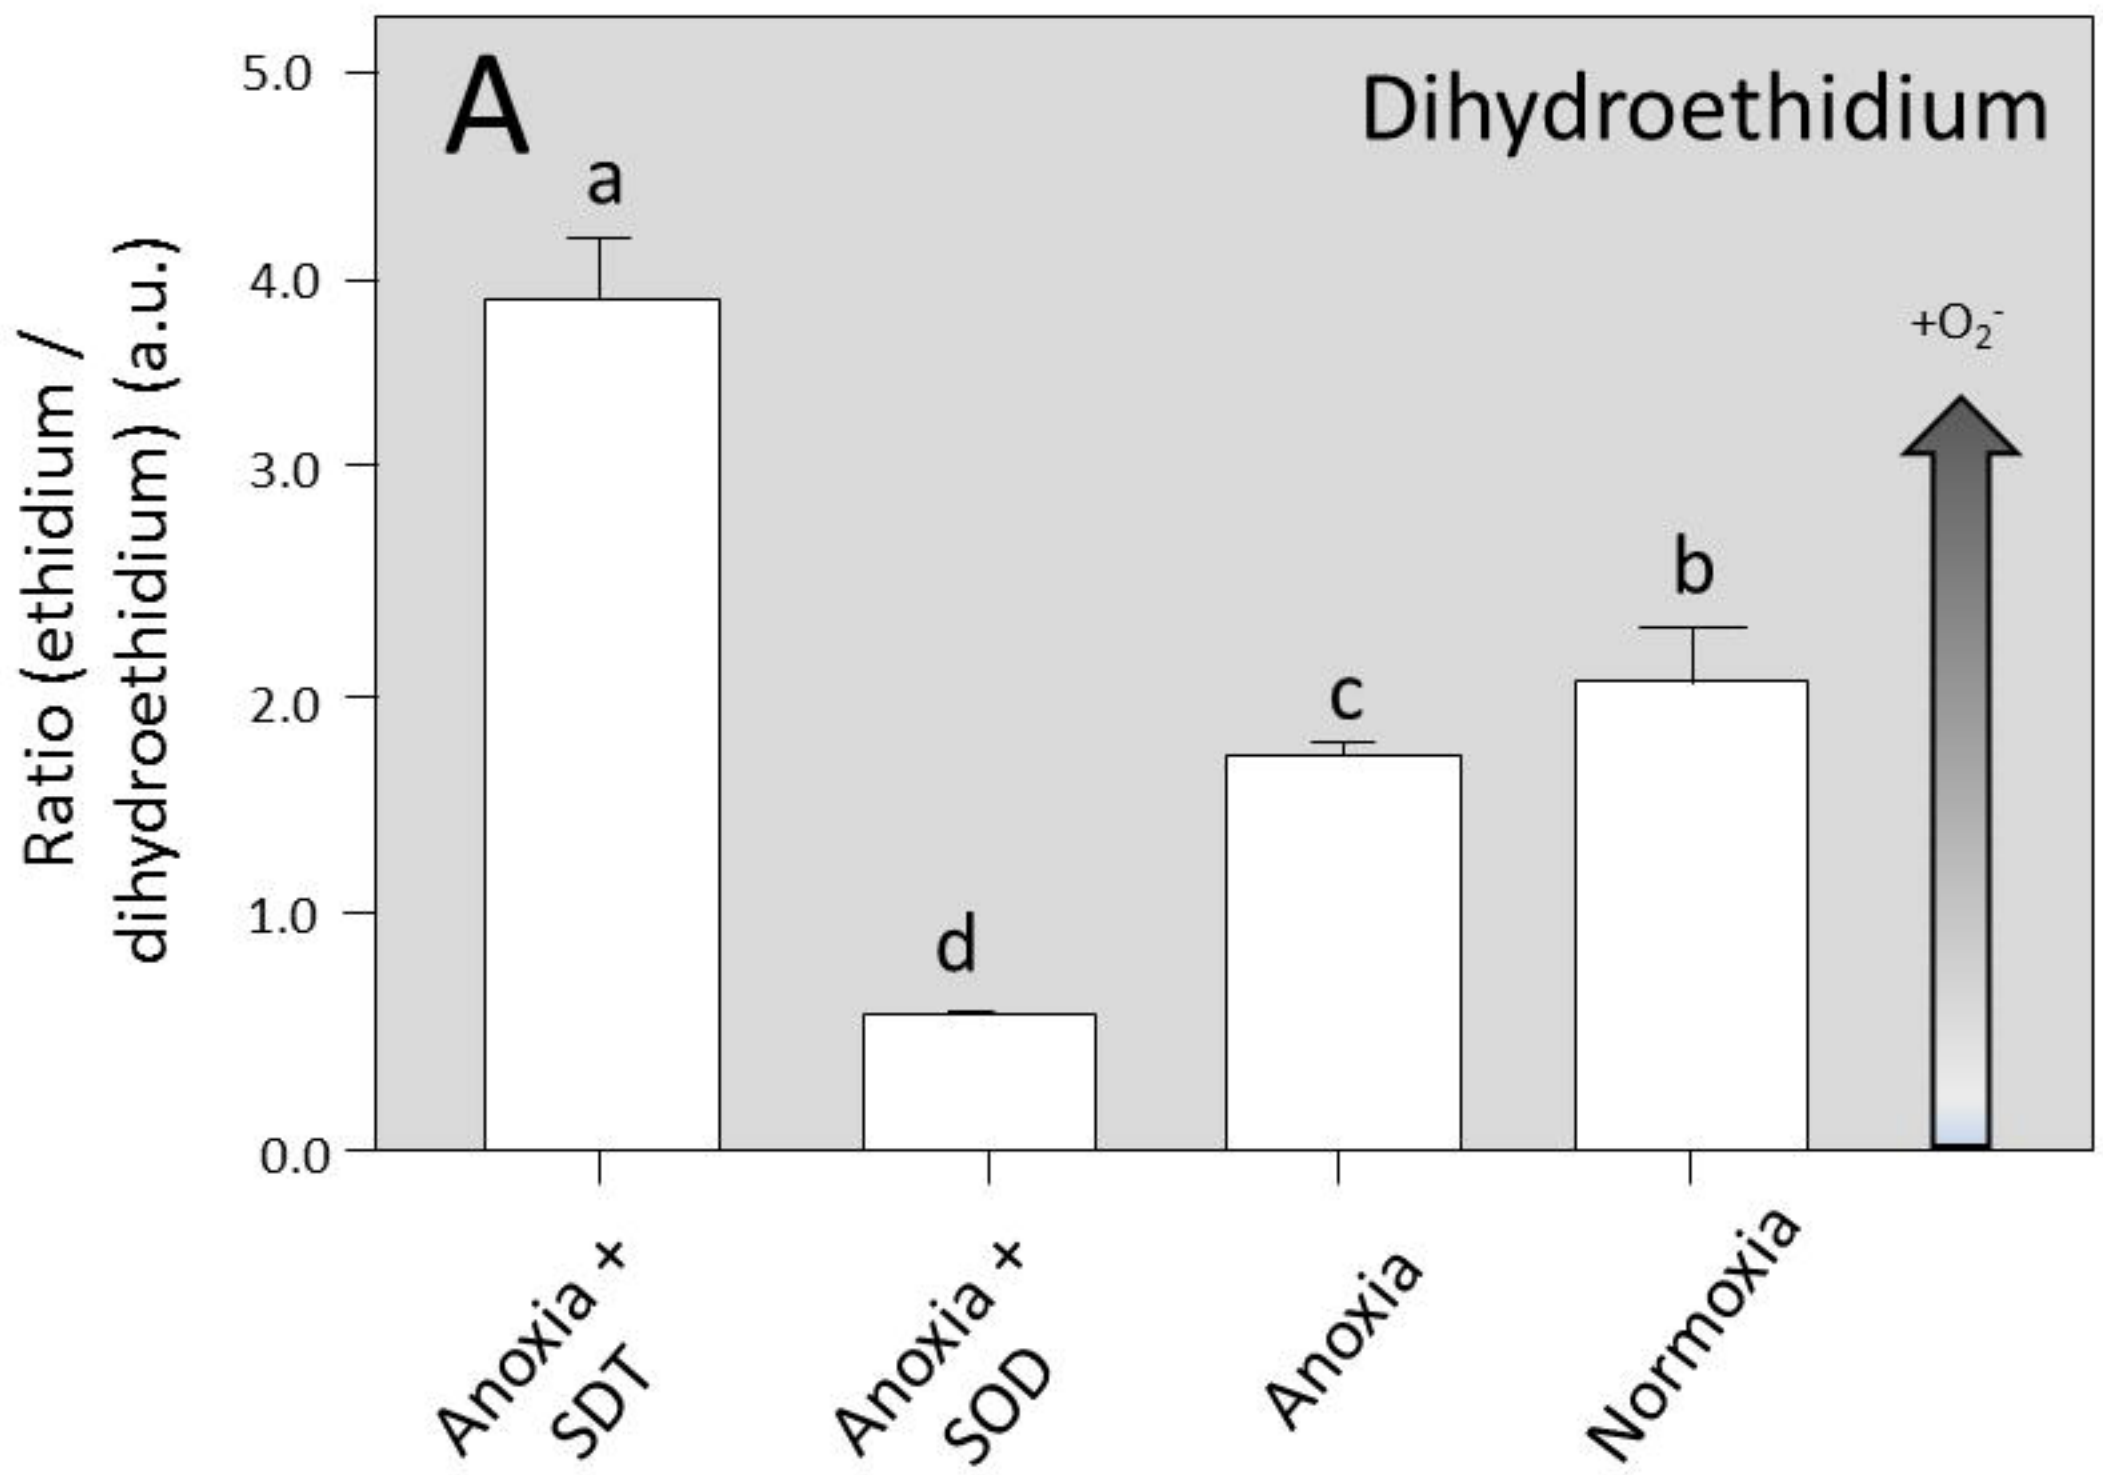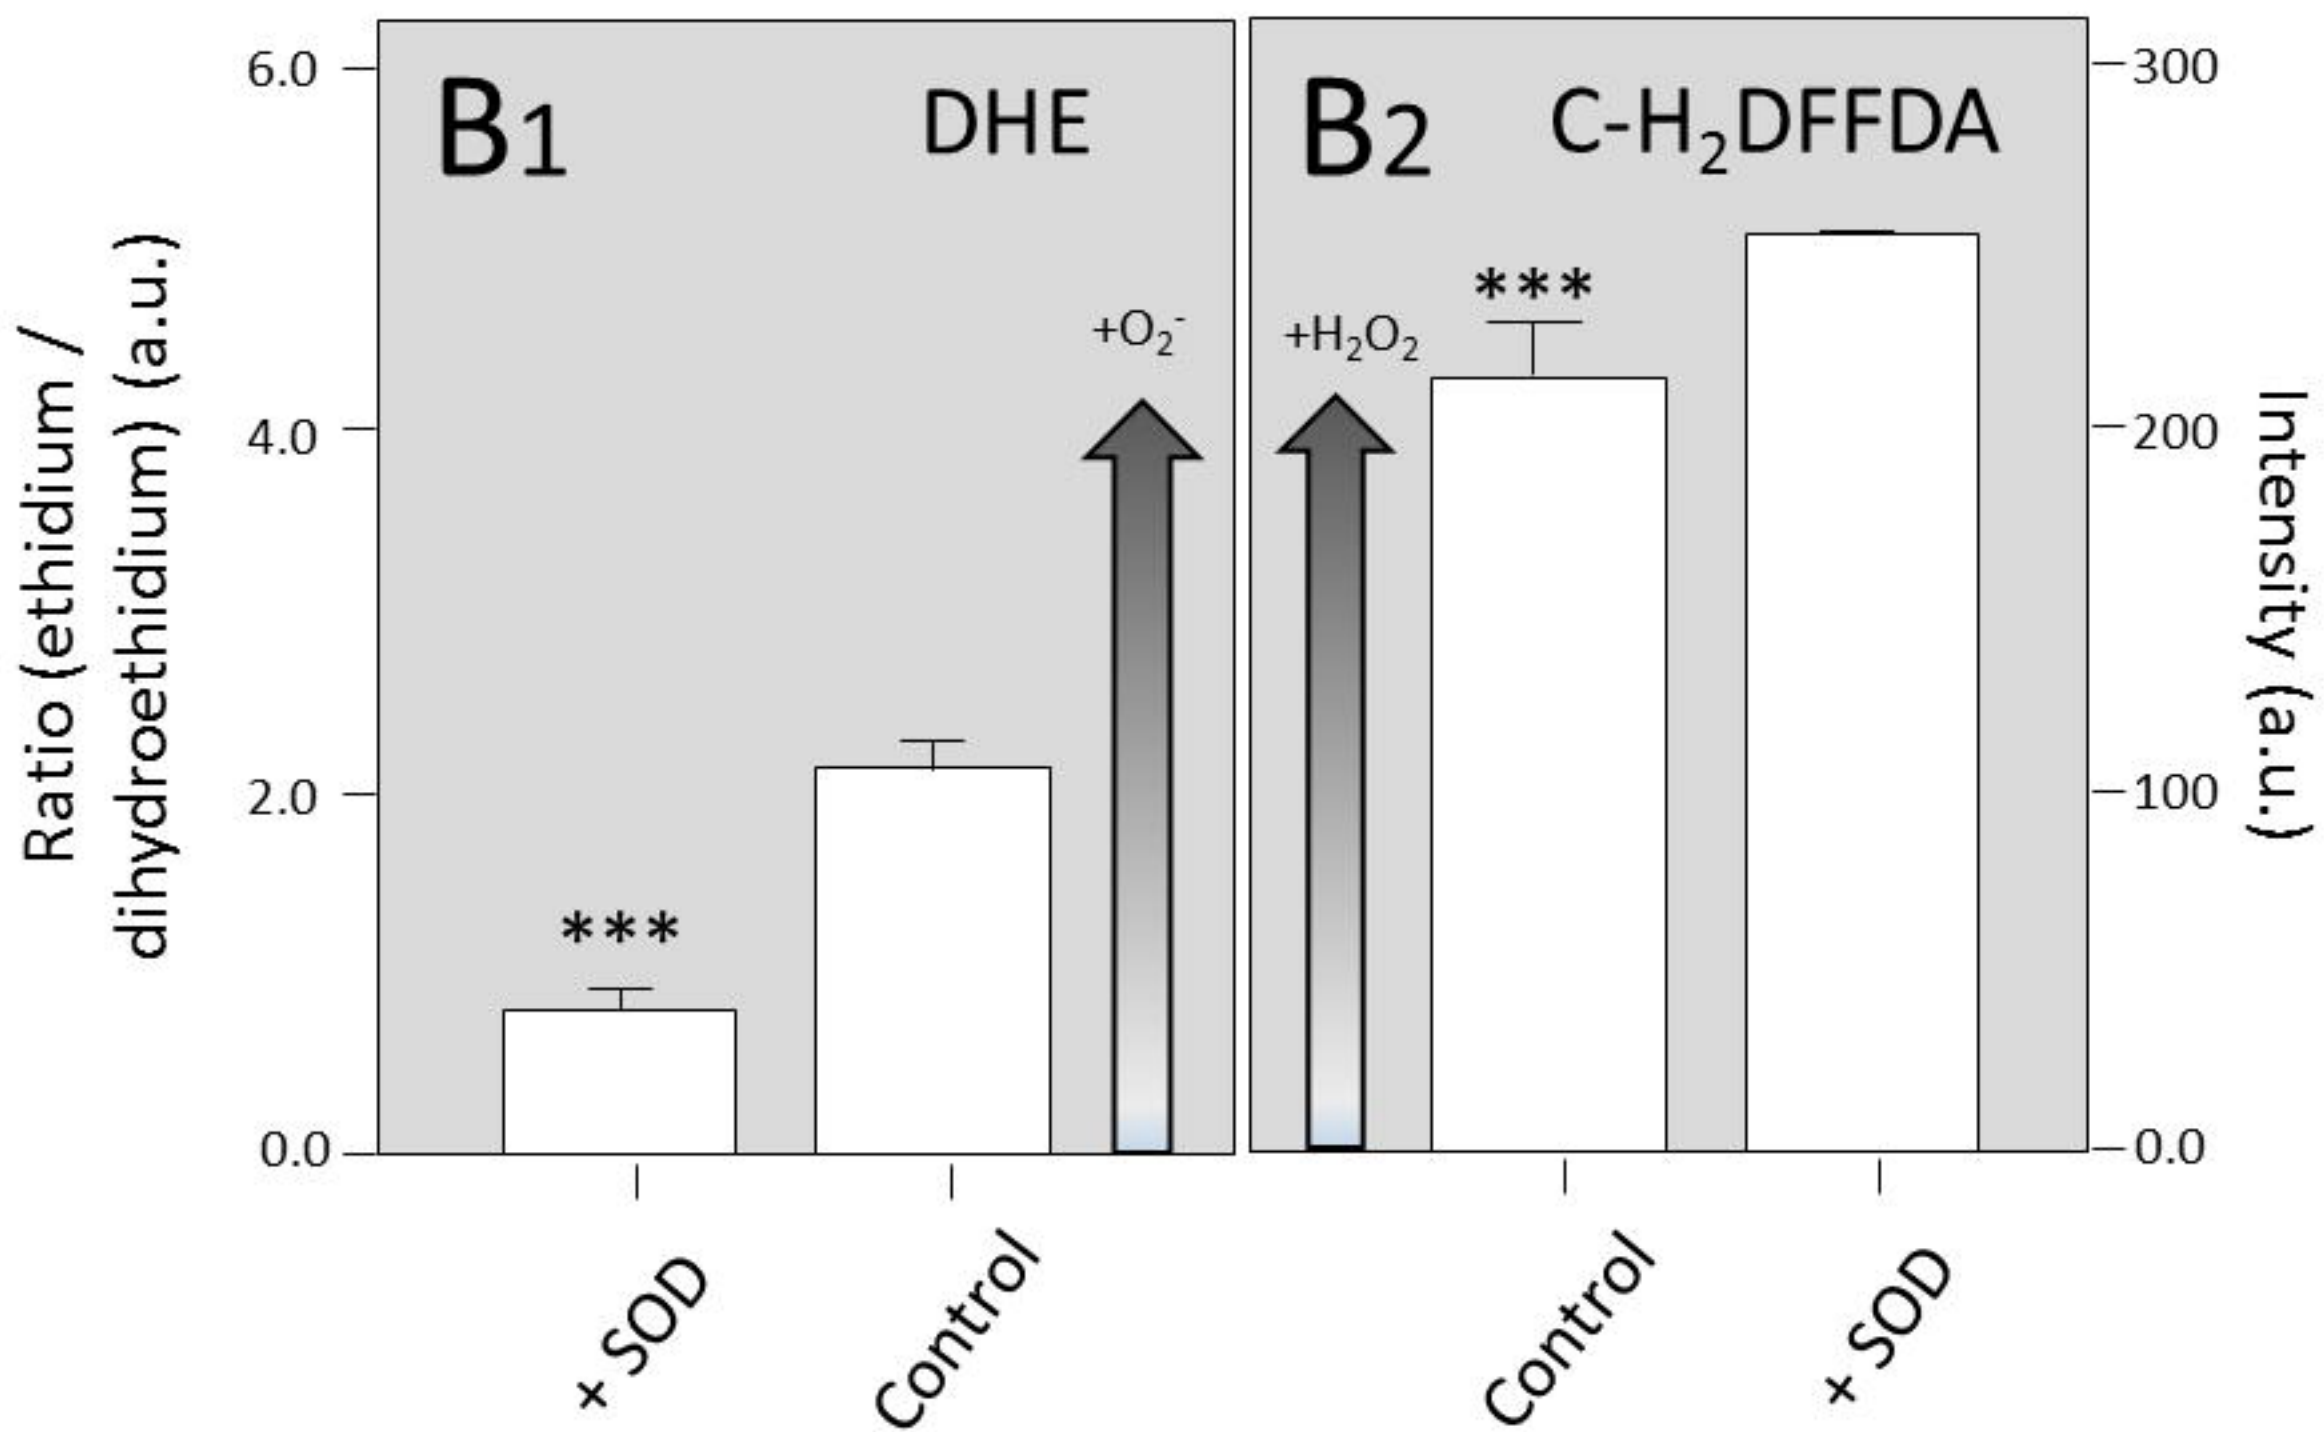

Table 1: Description of the dyes used during the present study:

| <b>Dye</b>                             | <b>Parameter measured</b>                                  | <b>Company/code</b>           | <b>Mechanism of function</b>                                                                                                                                                                                 |
|----------------------------------------|------------------------------------------------------------|-------------------------------|--------------------------------------------------------------------------------------------------------------------------------------------------------------------------------------------------------------|
| Ageladine-A<br>(in DMSO)               | pH                                                         | **                            | Probe which exists as a nearly uncharged monomer under pH of 8.1-8.6. After crossing cellular membranes, becomes charged in the cytosol and acidic compartments of cells.                                    |
| BCECF AM<br>(in DMSO)                  | pH                                                         | Molecular Probes<br>(B-3051)  | Probe which absorption shifts whether it occurs as the basic (phenolate anion) or acidic (protonated) form.                                                                                                  |
| MitoTracker Green FM<br>(in DMSO)      | Mitochondrial density                                      | Molecular Probes<br>(M-7514)  | Non-fluorescent molecule which becomes fluorescent once accumulates in the lipid environment of the mitochondria.                                                                                            |
| MitoTracker Deep Red 633<br>(in DMSO)  | Mitochondrial density                                      | Molecular Probes<br>(M-22426) | Non-fluorescent molecule which becomes fluorescent once accumulates in the lipid environment of the mitochondria.                                                                                            |
| JC-1<br>(in DMSO)                      | Mitochondrial membrane potential                           | Molecular Probes<br>(T-3168)  | This green fluorescent probe exists as a monomer at low $\Delta\psi_m$ . With high $\Delta\psi_m$ values, JC-1 aggregates and shows a red fluorescence.                                                      |
| Dihydroethidium (DHE)<br>(in DMSO)     | $O_2^{\bullet-}$                                           | Molecular Probes<br>(D-23107) | Regularly shows a blue emission when excited with a 355nm laser. When oxidized by the presence of $O_2^{\bullet-}$ , it intercalated with the DNA and shows a red emission when excited with an argon laser. |
| C-H <sub>2</sub> DFFDA<br>(in Ethanol) | H <sub>2</sub> O <sub>2</sub> , HOO• and ONOO <sup>-</sup> | Molecular Probes<br>(C-13293) | Non-fluorescent molecule which is converted to a green-fluorescent form when the acetate groups are removed by intracellular esterases and oxidation occurs in the cell.                                     |

\*\* Synthesized by Peter Karuso, Macquarie University, Sydney.

**Table 2:** Analysis conditions for each of the dyes used during the study.

| Dye                                 | Final conc. used ( $\mu\text{M}$ ) | Incubation time (min) | N ind per batch | N repetitions (total N individuals) | Excitation       |                  | Emission  |           | Calculation                                |
|-------------------------------------|------------------------------------|-----------------------|-----------------|-------------------------------------|------------------|------------------|-----------|-----------|--------------------------------------------|
|                                     |                                    |                       |                 |                                     | $\lambda_1$ (nm) | $\lambda_2$ (nm) | PMT1 (nm) | PMT2 (nm) |                                            |
| Ageladine-A (in DMSO)               | 15                                 | 90                    | 10              | 4 (50)                              | MP(370)          | -                | 420-500   | -         | Maximum Intensity                          |
| BCECF AM (in DMSO)                  | 5.0                                | 90                    | 10              | 2 (20)                              | MP(439)          | 488              | 520-550   | -         | Maximum values ratio $\lambda_2/\lambda_1$ |
| MitoTracker Green FM (in DMSO)      | 0.33                               | 30                    | 10              | 2 (20)                              | 488              | -                | 500-550   | -         | Maximum intensity                          |
| MitoTracker Deep Red 633 (in DMSO)  | 0.33                               | 60                    | 10              | 4 (40)                              | 633              | -                | 640-680   | -         | Maximum intensity                          |
| JC-1 (in DMSO)                      | 5                                  | 60                    | 10              | 2 (20)                              | 488              | 488              | 500-550   | 560-600   | Ratio PMT1/PMT2                            |
| Dihydroethidium (DHE) (in DMSO)     | 3.3                                | 30                    | 10              | 3 (30)                              | MP (355)         | 488              | 400-440   | 620-660   | Ratio PMT2/PMT1                            |
| C-H <sub>2</sub> DFFDA (in Ethanol) | 10.6                               | 30                    | 10              | 2 (20)                              | 488              | -                | 510-550   | -         | Maximum Intensity                          |

MP=Multiphoton laser. Values in parenthesis indicate the effective excitation wavelength.
